# Supplementary material for: Early perceptions and behavioural responses during the COVID-19 pandemic: a cross-sectional survey of UK adults
Source: PubMed Central journal article supplement — BMJ Open. 2021 Jan 4;11(1):e043577. doi: 10.1136/bmjopen-2020-043577 (PMC7783373; doi:10.1136/bmjopen-2020-043577), 2021-01-04
Supplement: bmjopen-2020-043577.draft_revisions.pdf [file bmjopen-2020-043577.draft_revisions.pdf]

# BMJ Open

BMJ Open is committed to open peer review. As part of this commitment we make the peer review history of every article we publish publicly available.

When an article is published we post the peer reviewers' comments and the authors' responses online. We also post the versions of the paper that were used during peer review. These are the versions that the peer review comments apply to.

The versions of the paper that follow are the versions that were submitted during the peer review process. They are not the versions of record or the final published versions. They should not be cited or distributed as the published version of this manuscript.

BMJ Open is an open access journal and the full, final, typeset and author-corrected version of record of the manuscript is available on our site with no access controls, subscription charges or pay-per-view fees (<http://bmjopen.bmj.com>).

If you have any questions on BMJ Open's open peer review process please email [info.bmjopen@bmj.com](mailto:info.bmjopen@bmj.com)

# BMJ Open

## Perceptions and behavioural responses of the general public during the early phase of the COVID-19 pandemic: A cross-sectional survey of UK Adults

|                               |                                                                                                                                                                                                                                                                                                                                                                                                                                                                                                                                                                                                                                                                                                                                                                                                                                                                                                                                                                                                                       |
|-------------------------------|-----------------------------------------------------------------------------------------------------------------------------------------------------------------------------------------------------------------------------------------------------------------------------------------------------------------------------------------------------------------------------------------------------------------------------------------------------------------------------------------------------------------------------------------------------------------------------------------------------------------------------------------------------------------------------------------------------------------------------------------------------------------------------------------------------------------------------------------------------------------------------------------------------------------------------------------------------------------------------------------------------------------------|
| Journal:                      | <i>BMJ Open</i>                                                                                                                                                                                                                                                                                                                                                                                                                                                                                                                                                                                                                                                                                                                                                                                                                                                                                                                                                                                                       |
| Manuscript ID                 | bmjopen-2020-043577                                                                                                                                                                                                                                                                                                                                                                                                                                                                                                                                                                                                                                                                                                                                                                                                                                                                                                                                                                                                   |
| Article Type:                 | Original research                                                                                                                                                                                                                                                                                                                                                                                                                                                                                                                                                                                                                                                                                                                                                                                                                                                                                                                                                                                                     |
| Date Submitted by the Author: | 07-Aug-2020                                                                                                                                                                                                                                                                                                                                                                                                                                                                                                                                                                                                                                                                                                                                                                                                                                                                                                                                                                                                           |
| Complete List of Authors:     | Atchison, Christina; Imperial College London, Patient Experience Research Centre, School of Public Health<br>Bowman, Leigh; Imperial College London, MRC Centre for Global Infectious Disease Analysis and Abdul Latif Jameel Institute for Disease and Emergency Analytics (J-IDEA), School of Public Health<br>Vrinten, Charlotte; Imperial College London, Centre for Health Economics & Policy Innovation, Department of Economics & Public Policy, Imperial College Business School<br>Redd, Rozlyn; Imperial College London, Patient Experience Research Centre, School of Public Health<br>Pristerà, Philippa ; Imperial College London, Patient Experience Research Centre, School of Public Health<br>Eaton, Jeffrey; Imperial College London, MRC Centre for Global Infectious Disease Analysis and Abdul Latif Jameel Institute for Disease and Emergency Analytics (J-IDEA), School of Public Health<br>Ward, Helen; Imperial College London, Patient Experience Research Centre, School of Public Health |
| Keywords:                     | COVID-19, EPIDEMIOLOGY, Public health < INFECTIOUS DISEASES, INFECTIOUS DISEASES                                                                                                                                                                                                                                                                                                                                                                                                                                                                                                                                                                                                                                                                                                                                                                                                                                                                                                                                      |
|                               |                                                                                                                                                                                                                                                                                                                                                                                                                                                                                                                                                                                                                                                                                                                                                                                                                                                                                                                                                                                                                       |

SCHOLARONE™  
Manuscripts

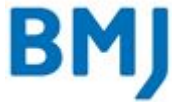

I, the Submitting Author has the right to grant and does grant on behalf of all authors of the Work (as defined in the below author licence), an exclusive licence and/or a non-exclusive licence for contributions from authors who are: i) UK Crown employees; ii) where BMJ has agreed a CC-BY licence shall apply, and/or iii) in accordance with the terms applicable for US Federal Government officers or employees acting as part of their official duties; on a worldwide, perpetual, irrevocable, royalty-free basis to BMJ Publishing Group Ltd ("BMJ") its licensees and where the relevant Journal is co-owned by BMJ to the co-owners of the Journal, to publish the Work in this journal and any other BMJ products and to exploit all rights, as set out in our [licence](#).

The Submitting Author accepts and understands that any supply made under these terms is made by BMJ to the Submitting Author unless you are acting as an employee on behalf of your employer or a postgraduate student of an affiliated institution which is paying any applicable article publishing charge ("APC") for Open Access articles. Where the Submitting Author wishes to make the Work available on an Open Access basis (and intends to pay the relevant APC), the terms of reuse of such Open Access shall be governed by a Creative Commons licence – details of these licences and which [Creative Commons](#) licence will apply to this Work are set out in our licence referred to above.

Other than as permitted in any relevant BMJ Author's Self Archiving Policies, I confirm this Work has not been accepted for publication elsewhere, is not being considered for publication elsewhere and does not duplicate material already published. I confirm all authors consent to publication of this Work and authorise the granting of this licence.

1  
2  
3 **Perceptions and behavioural responses of the general public during the early phase of the**  
4 **COVID-19 pandemic: A cross-sectional survey of UK Adults**  
5  
6  
7

8 Christina J Atchison<sup>1</sup>, Leigh Bowman<sup>2</sup>, Charlotte Vrinten<sup>3</sup>, Rozlyn Redd<sup>1</sup>, Philippa Pristerà<sup>1</sup>,  
9 Jeffrey W Eaton<sup>2</sup>, Helen Ward<sup>1,2</sup>  
10  
11

12  
13 1 Patient Experience Research Centre, School of Public Health, Imperial College London, UK

14 2 MRC Centre for Global Infectious Disease Analysis and Abdul Latif Jameel Institute for  
15 Disease and Emergency Analytics (J-IDEA), School of Public Health, Imperial College London,  
16 UK  
17  
18

19 3 Centre for Health Economics & Policy Innovation, Department of Economics & Public  
20 Policy, Imperial College Business School, Imperial College London, UK  
21  
22  
23

24  
25 **Corresponding author:**

26 Dr Christina J Atchison, Principal Academic Clinical Fellow

27 [christina.atchison11@imperial.ac.uk](mailto:christina.atchison11@imperial.ac.uk)

28 Patient Experience Research Centre (PERC), Imperial College London, St Mary's Campus,  
29 Norfolk Place, Paddington, London W2 1PG  
30

31 ORCID ID: <https://orcid.org/0000-0001-8304-7389>  
32

33  
34 Dr Leigh Bowman, Teaching Fellow in Public Health

35 [leigh.bowman@imperial.ac.uk](mailto:leigh.bowman@imperial.ac.uk)  
36

37 Dr Charlotte Vrinten, Research Associate

38 [c.vrinten@imperial.ac.uk](mailto:c.vrinten@imperial.ac.uk)  
39

40 Dr Rozlyn Redd, Research Associate

41 [r.redd@imperial.ac.uk](mailto:r.redd@imperial.ac.uk)  
42

43 Dr Philippa Pristerà, Research Associate

44 [p.pristera@imperial.ac.uk](mailto:p.pristera@imperial.ac.uk)  
45

46 Dr Jeffrey W Eaton, Senior Lecturer

47 [jeffrey.eaton@imperial.ac.uk](mailto:jeffrey.eaton@imperial.ac.uk)  
48

49 Prof. Helen Ward, Professor of Public Health

50 [h.ward@imperial.ac.uk](mailto:h.ward@imperial.ac.uk)  
51  
52  
53  
54  
55  
56  
57

58 **Keywords:** COVID-19, novel coronavirus, epidemic, behavioural response, risk perceptions  
59  
60

**ABSTRACT**

**Objective:** To examine risk perceptions and behavioural responses of the UK adult population during the early phase of the COVID-19 epidemic in the UK.

**Design:** A cross-sectional survey

**Setting:** Conducted with a nationally representative sample of UK adults within 48 hours of the UK Government advising the public to stop non-essential contact with others and all unnecessary travel.

**Participants:** 2,108 adults living in the UK aged 18 years and over. Data were collected between March 17 and 18 2020.

**Main outcome measures:** Descriptive statistics for all survey questions, including the number of respondents and the weighted percentages. Logistic regression was used to identify sociodemographic variation in: (1) adoption of social-distancing measures, (2) ability to work from home, and (3) willingness and (4) ability to self-isolate.

**Results** Overall, 1,992 (94.2%) respondents reported taking at least one preventive measure: 85.8% washed their hands with soap more frequently; 56.5% avoided crowded areas and 54.5% avoided social events. Adoption of social-distancing measures was higher in those aged over 70 compared to younger adults aged 18 to 34 years (aOR:1.9; 95% CI:1.1 to 3.4). Those with the lowest household income were six times less likely to be able to work from home (aOR:0.16; 95% CI:0.09 to 0.26) and three times less likely to be able to self-isolate (aOR:0.31; 95% CI:0.16 to 0.58). Ability to self-isolate was also lower in black and minority ethnic groups (aOR:0.47; 95% CI:0.27 to 0.82). Willingness to self-isolate was high across all respondents.

**Conclusions** The ability to adopt and comply with certain NPIs is lower in the most economically disadvantaged in society. Governments must implement appropriate social and economic policies to mitigate this. By incorporating these differences in NPIs among socio-economic subpopulations into mathematical models of COVID-19 transmission dynamics, our modelling of epidemic outcomes and response to COVID-19 can be improved.

**Keywords:** COVID-19, novel coronavirus, epidemic, pandemic, behavioural response, risk perceptions

## Article Summary

### Strengths and limitations of this study

- Nationally representative sample of the UK adult population
- Quick data collection during a rapidly evolving public health emergency
- Timeliness in relation to changing government response and recommendations
- The online approach excludes those without internet access
- Collecting self-report data are generally subject to limitations including honesty, introspective ability and interpretation of the questions.

For peer review only

## Introduction

On 31 December 2019, Chinese authorities notified the World Health Organisation (WHO) of an outbreak of pneumonia in Wuhan City, which was later classified as a new disease: COVID-19 [1]. Following identification of cases in countries outside China, on 30 January 2020, WHO declared the outbreak of COVID-19 a “Public Health Emergency of International Concern”[1]. In the UK, the first cases of COVID-19 were diagnosed at the end of January 2020, and community transmission was reported a few weeks later [2,3]. Government measures to control the epidemic were first announced on 22 January 2020 and included travel advice, information for those returning from affected countries, testing of suspected cases, isolation and contact tracing. This was followed in early February by a public health information campaign advising people to adopt hygiene measures to protect themselves and others, including more frequent handwashing with soap and water, using hand sanitiser if soap and water are not available, and covering mouth and nose with a tissue or sleeve when coughing or sneezing [4]. Then, on 3 March 2020, the UK Government published its action plan setting out the UK-wide response to the novel coronavirus. The UK Government’s response outlined measures in four key areas: containing the outbreak, delaying its spread, mitigating the impact, and research to improve diagnostics and treatment [5].

On March 16 2020, five days after the WHO declared the outbreak of COVID-19 a pandemic, the UK Prime Minister announced a shift to the delay phase of the UK response with measures aimed at suppressing the spread of the infection in the population through non-pharmaceutical interventions (NPIs), including social distancing of the whole population, isolation of cases for 7 days and quarantine of their household members for 14 days [6]. The public was advised to stop non-essential contact with others and all unnecessary travel: including working from home where possible and avoiding pubs, theatres, restaurants and other social venues [6]. This shift in response was prompted by a mathematical modelling study which showed that a combination of social distancing of the entire population, home isolation of cases and household quarantine of their family members (and possible school and university closure) was required to suppress transmission to a level that would enable the NHS to cope with the surge in cases requiring hospital admission and ventilation [7].

The effect of NPIs to reduce transmission rates is dependent on compliance with public health advice on social distancing. In the initial stages of the UK epidemic, this advice was voluntary, and not enforced by the government. This was criticised due to concern that

1  
2  
3 measures may not have the desired impact if a significant proportion of the population were  
4 unable or unwilling to comply. As such, this study aimed to assess reported behaviour and  
5 intention to comply with the NPIs, as recommended by the UK Government at the time of  
6 the survey. Preliminary findings were shared with the Scientific Advisory Group for  
7 Emergencies (SAGE), which advises the UK Government's response to COVID-19 [8].  
8  
9  
10  
11  
12

## 13 **Methods**

### 14 **Study design and sample**

15 A cross-sectional survey of a nationally representative sample of the UK adult (aged 18 years  
16 and over) population was conducted between March 17 and 18 2020, which followed the UK  
17 Government's 16 March announcement to increase social distancing measures by advising  
18 the public to stop non-essential contact with others and all unnecessary travel [6].  
19  
20  
21  
22  
23

24 The online survey was administered by YouGov, a market research company, to members of  
25 its UK panel of 800,000+ individuals as part of their omnibus survey [9]. A sample of 2,108  
26 adults was achieved through YouGov's non-probabilistic active sampling method [9]. Emails  
27 were sent to panellists from the base sample, randomly selecting panellists with particular  
28 characteristics to achieve quotas that matched the proportions of people with those  
29 characteristics in the UK 2011 census data [10]. The responding sample was weighted to be  
30 representative of the UK adult population.  
31  
32  
33  
34  
35  
36  
37

### 38 **Survey Instrument**

39 The questionnaire was adapted from a survey used in a similar study conducted in Hong  
40 Kong [11]. The questionnaire had four components: (1) socio-demographic characteristics,  
41 (2) risk perceptions towards COVID-19, (3) preventive behaviours, and (4) willingness and  
42 ability to self-isolate.  
43  
44  
45  
46  
47

48 *Socio-demographic characteristics* consisted of sex, age, ethnicity, marital status, caring  
49 responsibilities, UK area of residence, and socio-economic status (SES). SES was assessed  
50 using five indicators: education level, employment status, household income, savings, and  
51 household tenure.  
52  
53  
54

55 *Risk perceptions towards COVID-19* were measured by perceived susceptibility and  
56 perceived severity. Susceptibility was measured by asking respondents about perceived  
57  
58  
59  
60



1  
2  
3 likelihood of being infected with COVID-19 under the UK Government's current preventive  
4 measures. Severity was measured by asking respondents about perceived seriousness of  
5 symptoms if they were infected with COVID-19.  
6  
7  
8  
9

10 *Preventive behaviours* included information on perceived effectiveness and actual adoption  
11 of preventive behaviours (to protect oneself and others), to prevent both contracting  
12 COVID-19 and onward transmission, and were collected under three categories: (1) hygiene  
13 practices (wearing a face mask, washing hands more frequently with soap and water, using  
14 hand sanitiser more regularly, disinfecting the home, covering nose and mouth when  
15 sneezing or coughing) (2) travel avoidance (travel to affected countries and travel to areas  
16 inside and outside the UK, regardless of whether they were affected) (3) social distancing  
17 (avoiding public transport, social events, going out in general, going to hospital or other  
18 healthcare settings, crowded places, and contact with people who have a fever or  
19 respiratory symptoms).  
20  
21  
22  
23  
24  
25  
26  
27

28 *Willingness and ability to self-isolate* if asked by a healthcare professional were measured  
29 using two questions developed for this survey. At the time the survey was conducted, Public  
30 Health England's operational definition of 'self-isolation' was "*if you have symptoms of*  
31 *coronavirus infection (COVID-19), however mild, do not leave your home (even to buy food or*  
32 *essentials) or have any visitors for 7 days from when your symptoms started. This includes*  
33 *not going to work, school or other public places, and avoiding public transport or taxis. Self-*  
34 *isolation is the same as voluntary quarantine.*"[12]  
35  
36  
37  
38  
39  
40

41 We worked with YouGov to optimise question clarity and ease of understanding for the UK  
42 population.  
43  
44  
45

46 The survey instrument is freely available to download from the School of Public Health,  
47 Imperial College London COVID-19 resources webpage: [https://www.imperial.ac.uk/mrc-  
48 global-infectious-disease-analysis/covid-19/covid-19-resources/](https://www.imperial.ac.uk/mrc-global-infectious-disease-analysis/covid-19/covid-19-resources/)  
49  
50  
51

### 52 **Data Collection**

53 Data were collected between 1630 GMT on 17 March 2020 and 1030 GMT on 18 March  
54 2020. Participants identified for the sample were sent an email with a survey link. YouGov  
55 returned the anonymised data set to the Imperial College London research team for analysis.  
56  
57  
58  
59  
60

## Data Analysis

Analyses were conducted in Stata 15 and SPSS version 25.

Descriptive statistics for all variables present the number of respondents and the weighted percentages.

Logistic regression was used to identify sociodemographic variation in: (1) adoption of social-distancing measures, (2) ability to work from home, and (3) willingness and (4) ability to self-isolate. Adoption of social distancing measures was proxied by respondents reporting to have avoided crowded places and social events to protect themselves or others from COVID-19.

Variables that appeared to be associated ( $p < 0.20$ ) in the unadjusted analyses were considered in the adjusted analyses. Adjusted odds ratios (aOR) and 95% confidence intervals (CI) were estimated. Associations with a  $p$ -value  $< 0.05$  in the adjusted analyses were considered to be statistically significant.

We tested for collinearity between education level, employment status, household income, savings, and household tenure. For these categorical variables, collinearity was measured by examining bivariate relationships using Pearson's Chi-squared tests. Where collinearity was detected we ran separate adjusted regression analyses for those variables, using only other explanatory variables in those models that were not strongly correlated.

## Patient and Public Involvement

We distributed an online feedback form to communities across the UK using local networks of public partners and contacts, Twitter and via VOICE-global.org, an online platform for public involvement in research established by Newcastle University. We received 420 responses, including 328 from members of the public. The experiences and feedback shared guided our study design and scope, including the phrasing of the survey tool's closed-ended questions and the refinement of pre-populated answer choices.

Study results will be shared with the public both by posting on the VOICE-global.org news page, on the research team's website, and through direct mail with those who consented to be contacted about our research and involvement activity.

### **Ethical approval**

The Imperial College London Research Ethics Committee approved the study (Ref 20IC5861). Informed consent was obtained from those who chose to complete the survey after having read introductory information on its content and purpose.

### **Results**

The overall sample was designed to be representative of the UK adult population and is described in Table 1. In summary, of the 2,108 respondents, 11.1% were 18 to 24 years old, and 13.5% were 70 years or older. The majority of respondents were white (93.9%). In total, 43.4% were in full-time work and 14.1% were in part-time work.

Overall, 77.4% (1,640/2,108) of respondents reported being worried about the COVID-19 outbreak in the UK. For those that had not previously tested positive for COVID-19, 47.5% (979/2,108) believed that it was likely they would be infected at some point in the future under the UK Government's preventive measures. If infected, just over half (56.9%) of respondents would expect to be moderately severely affected (e.g. may need self-care and rest in bed) (Table 1).

Accordingly, 94.2% of adults reported taking at least one preventive measure (to protect oneself and others) against COVID-19 infection: 85.8% washed their hands with soap more frequently; 56.5% avoided crowded areas; 54.5% avoided social events and 39.2% avoided public transport (Figure 1). Most reported that their behaviour change was in response to government guidance (71.3%). Preventive measures perceived to be most effective were washing hands more frequently with soap and water (92.5%), avoiding contact with people who have a fever or respiratory symptoms (91.4%), and covering nose and mouth when sneezing or coughing (90.0%) (Figure 1). Perceived effectiveness of preventive measures was higher than actual adoption for all measures. This was particularly marked for social distancing measures (Figure 1).

### **Adoption of social-distancing measures**

Overall, 45.2% of respondents reported adopting social distancing measures (avoiding crowded places and avoiding social events) to protect themselves or others from COVID-19.

Table 2 shows the regression analysis results for adoption of social-distancing measures. Being 70 years or older (64·2% vs. 38·4%; aOR:1·9; 95% CI:1·1,3·4) was positively associated with greater adoption compared to younger adults aged 18 to 34 years. Compared with those who were married, in a civil partnership, or living as married (48·4%), respondents who were separated, divorced, or widowed (44·1%; aOR:0·63; 95% CI:0·43,0·91) or never married (38·4; aOR:0·70; 95% CI:0·50,0·97) were less likely to have adopted social distancing measures to prevent transmission of COVID-19.

**Table 1. Demographics, socio-economic characteristics and COVID-19 risk perceptions, N=2,108**

| Characteristic                                             | No.  | Weighted % |
|------------------------------------------------------------|------|------------|
| <b>Demographic and socio-economic</b>                      |      |            |
| <b>Age (years)</b>                                         |      |            |
| 18-24                                                      | 218  | 11·1       |
| 25-34                                                      | 294  | 14·4       |
| 35-44                                                      | 396  | 19·3       |
| 45-54                                                      | 355  | 17·5       |
| 55-69                                                      | 519  | 24·2       |
| 70 or above                                                | 326  | 13·5       |
| <b>Sex</b>                                                 |      |            |
| Male                                                       | 987  | 48·0       |
| Female                                                     | 1094 | 50·7       |
| Prefer not to say                                          | 27   | 1·3        |
| <b>Ethnicity</b>                                           |      |            |
| White                                                      | 1985 | 93·9       |
| Asian/Asian British                                        | 48   | 2·4        |
| Black / African / Caribbean / Black British                | 20   | 1·0        |
| Other ethnic group, including mixed/multiple ethnic groups | 39   | 1·9        |
| Prefer not to say                                          | 16   | 0·77       |
| <b>Marital status</b>                                      |      |            |
| Married, civil partnership, or living as married           | 1283 | 60·3       |
| Separated, divorced, or widowed                            | 270  | 12·2       |
| Never married                                              | 545  | 27·1       |
| Prefer not to say                                          | 10   | 0·45       |
| <b>Area of residence</b>                                   |      |            |
| London                                                     | 239  | 13·1       |
| North                                                      | 522  | 23·3       |
| Midlands                                                   | 531  | 25·2       |
| South                                                      | 485  | 22·5       |
| N. Ireland, Scotland, Wales                                | 331  | 15·9       |
| <b>Education</b>                                           |      |            |
| No formal qualification                                    | 121  | 5·5        |
| Secondary-level qualification                              | 859  | 42·1       |
| Post-secondary-level, below bachelor                       | 148  | 6·9        |
| Bachelor-level or above                                    | 664  | 30·8       |
| Other technical, professional or higher qualification      | 245  | 11·2       |
| Don't Know                                                 | 32   | 1·6        |
| Prefer not to say                                          | 39   | 2·0        |
| <b>Employment status</b>                                   |      |            |

|                                                                               |      |      |
|-------------------------------------------------------------------------------|------|------|
| Working full time                                                             | 889  | 43.4 |
| Working part time                                                             | 292  | 14.1 |
| Full time student                                                             | 112  | 5.6  |
| Retired                                                                       | 553  | 23.6 |
| Unemployed or not working                                                     | 207  | 10.5 |
| Other                                                                         | 55   | 2.8  |
| <b>Household income</b>                                                       |      |      |
| <£20,000                                                                      | 440  | 20.7 |
| £20,000 to £29,999                                                            | 355  | 16.8 |
| £30,000-£49,999                                                               | 472  | 22.4 |
| £50,000 and over                                                              | 429  | 20.6 |
| Don't know                                                                    | 103  | 5.1  |
| Prefer not to say                                                             | 309  | 14.4 |
| <b>Savings</b>                                                                |      |      |
| Less than £100                                                                | 278  | 13.6 |
| £100 to £999                                                                  | 242  | 11.8 |
| £1,000 to £4,999                                                              | 305  | 14.5 |
| £5,000 to £24,999                                                             | 359  | 16.6 |
| £25,000 or more                                                               | 359  | 16.6 |
| Prefer not to say                                                             | 565  | 26.9 |
| <b>Housing tenure</b>                                                         |      |      |
| Own – outright                                                                | 681  | 30.4 |
| Own – mortgage/shared ownership                                               | 639  | 30.8 |
| Rent – private landlord                                                       | 319  | 15.6 |
| Rent – local authority/housing association                                    | 219  | 10.7 |
| Live with parents, family or friends                                          | 215  | 10.7 |
| Other                                                                         | 35   | 1.8  |
| <b>COVID-19 risk perceptions</b>                                              |      |      |
| <b>Level of worry about the current COVID-19 outbreak in the UK</b>           |      |      |
| Worried                                                                       | 1640 | 77.4 |
| Not worried                                                                   | 454  | 21.9 |
| Don't know                                                                    | 14   | 0.74 |
| <b>Perceived susceptibility<sup>a</sup></b>                                   |      |      |
| Likely                                                                        | 979  | 47.5 |
| Neither likely or unlikely                                                    | 547  | 26.2 |
| Unlikely                                                                      | 337  | 15.9 |
| Don't know                                                                    | 220  | 10.5 |
| <b>Perceived severity<sup>b</sup></b>                                         |      |      |
| I would expect it to be life-threatening                                      | 103  | 4.7  |
| I would expect it to be severe (e.g. may need care and treatment in hospital) | 306  | 14.2 |
| I would expect it to be moderate (e.g. may need self-care and rest in bed)    | 1180 | 56.9 |
| I would expect it to be mild (e.g. can go about daily tasks normally)         | 351  | 17.2 |
| I would expect to have no symptoms                                            | 33   | 1.7  |
| Don't know                                                                    | 110  | 5.3  |

<sup>a</sup>Under the UK government's current preventive measures (at the time of the study), how likely or unlikely do you think it is you will be infected with the coronavirus (COVID-19) at any point in the future?

<sup>b</sup>Please imagine you were infected with coronavirus (i.e. COVID-19), which of the following do you think would best apply?

**Figure 1. Perceived effectiveness and actual adoption of preventative measures to prevent transmission of COVID-19; N=2,108**

Table 2. Social distancing behaviour and ability to work from home by a range of sociodemographic factors, N=2,108

|                                                  | Social distancing measures being taken yes vs no <sup>a</sup> |            |                            |                          | Able to work from home yes vs no (N=1,149) <sup>d</sup> |            |                          |                      |
|--------------------------------------------------|---------------------------------------------------------------|------------|----------------------------|--------------------------|---------------------------------------------------------|------------|--------------------------|----------------------|
|                                                  | N                                                             | Weighted % | Unadjusted OR (95% CI)     | Adjusted OR (95% CI)     | N                                                       | Weighted % | Unadjusted OR (95% CI)   | Adjusted OR (95% CI) |
| <b>Social distancing</b>                         |                                                               |            |                            |                          |                                                         |            |                          |                      |
| Yes                                              | 969                                                           | 45.2       |                            |                          |                                                         |            |                          |                      |
| No                                               | 1,139                                                         | 54.8       |                            |                          |                                                         |            |                          |                      |
| <b>Ability to work from home</b>                 |                                                               |            |                            |                          |                                                         |            |                          |                      |
| Yes                                              |                                                               |            |                            |                          | 540                                                     | 44.3       |                          |                      |
| No                                               |                                                               |            |                            |                          | 609                                                     | 53.0       |                          |                      |
| Don't Know                                       |                                                               |            |                            |                          | 32                                                      | 2.7        |                          |                      |
| <b>Age</b>                                       |                                                               |            |                            |                          |                                                         |            |                          |                      |
| 18-34                                            | 202                                                           | 38.4       | Ref                        | Ref <sup>b</sup>         | 154                                                     | 48.0       | Ref                      | Ref <sup>e</sup>     |
| 35-49                                            | 229                                                           | 40.8       | 1.1 (0.86-1.4)             | 1.2 (0.83-1.7)           | 220                                                     | 48.0       | 1.0 (0.75-1.3)           | 0.95 (0.63-1.4)      |
| 50-69                                            | 329                                                           | 46.4       | <b>1.4 (1.1-1.8)**</b>     | 1.2 (0.85-1.8)           | 151                                                     | 39.9       | <b>0.72 (0.53-0.98)*</b> | 0.68 (0.43-1.1)      |
| 70 or older                                      | 209                                                           | 64.2       | <b>2.9 (2.2-3.8)***</b>    | <b>1.9 (1.1-3.4)*</b>    | 15                                                      | 53.9       | 1.3 (0.57-2.8)           | 2.0 (0.57-7.0)       |
| <b>Sex</b>                                       |                                                               |            |                            |                          |                                                         |            |                          |                      |
| Male                                             | 436                                                           | 42.9       | Ref                        | Ref <sup>b</sup>         | 280                                                     | 46.1       | Ref                      | -                    |
| Female                                           | 519                                                           | 47.4       | <b>1.2 (1.0-1.4)*</b>      | 1.1 (0.90-1.4)           | 254                                                     | 44.8       | 0.95 (0.75-1.2)          |                      |
| <b>Ethnicity</b>                                 |                                                               |            |                            |                          |                                                         |            |                          |                      |
| White                                            | 919                                                           | 45.5       | Ref                        | -                        | 506                                                     | 45.1       | Ref                      | Ref <sup>e</sup>     |
| Black, Asian and minority ethnic                 | 45                                                            | 42.1       | 0.87 (0.58-1.3)            |                          | 31                                                      | 54.2       | 1.4 (0.84-2.5)           | 1.2 (0.56-2.4)       |
| <b>Marital status</b>                            |                                                               |            |                            |                          |                                                         |            |                          |                      |
| Married, civil partnership, or living as married | 628                                                           | 48.4       | Ref                        | Ref <sup>b</sup>         | 366                                                     | 47.2       | Ref                      | -                    |
| Separated, divorced, or widowed                  | 121                                                           | 44.1       | 0.84 (0.64-1.1)            | <b>0.63 (0.43-0.91)*</b> | 43                                                      | 39.5       | 0.73 (0.48-1.1)          |                      |
| Never married                                    | 214                                                           | 38.4       | <b>0.66 (0.54-0.82)***</b> | <b>0.70 (0.50-0.97)*</b> | 128                                                     | 43.5       | 0.86 (0.66-1.1)          |                      |
| <b>Area of residence</b>                         |                                                               |            |                            |                          |                                                         |            |                          |                      |
| London                                           | 111                                                           | 45.2       | Ref                        | -                        | 76                                                      | 54.0       | Ref                      | Ref <sup>e</sup>     |
| North of England                                 | 220                                                           | 41.6       | 0.86 (0.63-1.2)            |                          | 129                                                     | 44.7       | 0.69 (0.45-1.0)          | 1.1 (0.63-1.8)       |
| Midlands and East of England                     | 249                                                           | 46.0       | 1.0 (0.76-1.4)             |                          | 123                                                     | 44.4       | 0.68 (0.45-1.0)          | 0.93 (0.54-1.6)      |
| South of England                                 | 221                                                           | 45.0       | 0.99 (0.72-1.4)            |                          | 151                                                     | 49.0       | 0.82 (0.54-1.2)          | 1.1 (0.66-1.8)       |

1  
2  
3  
4  
5  
6  
7  
8  
9  
10  
11  
12  
13  
14  
15  
16  
17  
18  
19  
20  
21  
22  
23  
24  
25  
26  
27  
28  
29  
30  
31  
32  
33  
34  
35  
36  
37  
38  
39  
40  
41  
42  
43  
44  
45  
46

|                                                 |     |      |                            |                  |     |      |                            |                            |
|-------------------------------------------------|-----|------|----------------------------|------------------|-----|------|----------------------------|----------------------------|
| N. Ireland, Scotland, Wales                     | 168 | 49.9 | 1.2 (0.86-1.7)             |                  | 61  | 35.2 | <b>0.46 (0.29-0.74)***</b> | 0.57 (0.31-1.0)            |
| <b>Education</b>                                |     |      |                            |                  |     |      |                            |                            |
| Degree or above                                 | 321 | 48.0 | Ref                        | -                | 289 | 62.6 | Ref                        | Ref <sup>f</sup>           |
| Post-secondary                                  | 186 | 46.7 | 0.95 (0.74-1.2)            |                  | 105 | 47.7 | <b>0.54 (0.39-0.76)***</b> | <b>0.58 (0.41-0.82)**</b>  |
| Secondary or below                              | 436 | 43.7 | 0.84 (0.69-1.0)            |                  | 137 | 29.4 | <b>0.25 (0.19-0.33)***</b> | <b>0.29 (0.21-0.39)***</b> |
| <b>Employment status</b>                        |     |      |                            |                  |     |      |                            |                            |
| Working full time                               | 344 | 38.6 | Ref                        | Ref <sup>b</sup> | 439 | 48.9 | Ref                        | Ref <sup>e</sup>           |
| Working part time                               | 136 | 46.8 | <b>1.4 (1.1-1.8)**</b>     | 1.2 (0.85-1.7)   | 101 | 35.0 | <b>0.56 (0.42-0.74)***</b> | 0.74 (0.50-1.1)            |
| Full time student                               | 43  | 36.3 | 0.91 (0.60-1.4)            | 1.4 (0.71-2.6)   | N/A | N/A  | N/A                        | N/A                        |
| Retired                                         | 331 | 59.7 | <b>2.4 (1.9-2.9)***</b>    | 1.5 (0.99-2.3)   | N/A | N/A  | N/A                        | N/A                        |
| Unemployed / Not working                        | 95  | 45.4 | 1.3 (0.97-1.8)             | 1.4 (0.90-2.2)   | N/A | N/A  | N/A                        | N/A                        |
| <b>Household income</b>                         |     |      |                            |                  |     |      |                            |                            |
| £50,000 and over                                | 178 | 41.0 | Ref                        | Ref <sup>c</sup> | 241 | 67.3 | Ref                        | Ref <sup>g</sup>           |
| £30,000 to £49,999                              | 211 | 43.8 | 1.1 (0.86-1.5)             | 1.0 (0.77-1.4)   | 131 | 42.6 | <b>0.36 (0.26-0.50)***</b> | <b>0.36 (0.26-0.51)***</b> |
| £20,000 to £29,999                              | 173 | 48.5 | <b>1.4 (1.0-1.8)*</b>      | 1.2 (0.87-1.6)   | 64  | 30.7 | <b>0.22 (0.15-0.31)***</b> | <b>0.22 (0.15-0.32)***</b> |
| <£20,000                                        | 218 | 49.0 | <b>1.4 (1.1-1.8)*</b>      | 1.1 (0.79-1.5)   | 31  | 22.7 | <b>0.14 (0.09-0.23)***</b> | <b>0.16 (0.09-0.26)***</b> |
| <b>Savings</b>                                  |     |      |                            |                  |     |      |                            |                            |
| £25,000 or more                                 | 177 | 48.4 | Ref                        | Ref <sup>c</sup> | 100 | 59.9 | Ref                        | Ref <sup>g</sup>           |
| £5,000 to £24,999                               | 177 | 48.7 | 1.0 (0.75-1.4)             | 1.3 (0.94-1.8)   | 131 | 57.6 | 0.91 (0.60-1.4)            | 0.77 (0.49-1.2)            |
| £1,000 to £4,999                                | 126 | 40.7 | 0.73 (0.54-1.0)            | 1.0 (0.72-1.4)   | 89  | 43.7 | <b>0.52 (0.34-0.80)**</b>  | <b>0.46 (0.29-0.72)**</b>  |
| £100 to £999                                    | 91  | 37.4 | <b>0.64 (0.45-0.89)**</b>  | 0.89 (0.61-1.3)  | 67  | 40.1 | <b>0.45 (0.29-0.70)***</b> | <b>0.41 (0.26-0.67)***</b> |
| Less than £100                                  | 122 | 43.5 | 0.82 (0.60-1.1)            | 1.1 (0.79-1.6)   | 54  | 33.1 | <b>0.33 (0.21-0.52)***</b> | <b>0.30 (0.18-0.49)***</b> |
| <b>Housing tenure</b>                           |     |      |                            |                  |     |      |                            |                            |
| Own outright                                    | 377 | 55.0 | Ref                        | Ref <sup>c</sup> | 93  | 41.0 | Ref                        | Ref <sup>g</sup>           |
| Own with mortgage/shared ownership              | 261 | 40.8 | <b>0.56 (0.45-0.70)***</b> | 0.87 (0.66-1.1)  | 293 | 55.0 | <b>1.8 (1.3- 2.4)*</b>     | 1.4 (0.96-2.1)             |
| Rented from private landlord                    | 145 | 45.0 | <b>0.67 (0.51-0.88)**</b>  | 1.1 (0.79-1.5)   | 85  | 39.8 | 0.95 (0.65-1.4)            | 0.65 (0.40-1.0)            |
| Rented from local authority/housing association | 94  | 42.2 | <b>0.60 (0.44-0.82)**</b>  | 0.79 (0.56-1.1)  | 16  | 18.2 | <b>0.32 (0.17-0.59)***</b> | <b>0.37 (0.18-0.75)**</b>  |
| Live with parents, family, or friends           | 78  | 35.4 | <b>0.45 (0.32-0.62)***</b> | 0.84 (0.54-1.3)  | 46  | 43.6 | 1.1 (0.69-1.8)             | 0.96 (0.54-1.7)            |

<sup>a</sup>Those that report avoiding crowded areas AND social events; <sup>b</sup>Mutually adjusted for age, sex, marital status, employment status, household income, savings and housing tenure; <sup>c</sup>Adjusted for age, sex, marital status and employment status. <sup>d</sup>Excluding those who responded "Don't know"; <sup>e</sup>Mutually adjusted for age, ethnicity, UK area of residence, household income, savings and housing tenure; <sup>f</sup>Adjusted for age, ethnicity, UK area of residence and housing tenure; <sup>g</sup>Adjusted for age, ethnicity and UK area of residence. \*p<.05, \*\*p<.01, \*\*\*p<.001

### Ability to work from home

Overall, 44.3% of respondents reported being able to work from home (i.e. permitted by their employer and have the necessary equipment to do their job from home).

Respondents who held post-secondary but below degree-level (47.7%; aOR:0.58; 95% CI:0.41,0.82) and secondary or below level (29.4%; aOR:0.29; 95% CI:0.21,0.39) education qualifications were less likely to be able to work from home compared with those educated to degree level (62.6%) (Table 2). As with educational level, there was a household income and savings gradient with ability to work from home. Those with the lowest household income (<£20,000) were six times less likely to be able to work from home compared to those with household incomes of £50,000 and above (22.7% vs. 67.3%; aOR:0.16; 95% CI:0.09,0.26). Respondents with £100 savings or less were three times less likely to be able to work from home compared to those with £25,000 or more in savings (33.1% vs. 59.9%; aOR:0.33; 95% CI:0.21,0.52) (Table 2).

Compared with those who owned their home outright, those renting accommodation from a local authority or housing association were less likely to be able to work from home (18.2% vs. 41.0%; aOR:0.37; 95% CI:0.18,0.75).

### Willingness and ability to self-isolate

Overall, perceived ability (87.0%) and willingness (87.6%) to self-isolate for 7 days if asked by a healthcare professional were high.

In terms of socio-demographic associations, there was no effect of sex on perceived ability to self-isolate (Table 3). However, women were somewhat more willing to do so than men (94.9% vs. 91.8%; aOR:2.1; 95% CI:1.2,3.5). Respondents from ethnic minority backgrounds perceived themselves to be less able to self-isolate than respondents from White backgrounds (84.8% vs. 92.1%, aOR:0.47; 95% CI:0.27,0.82), although they were equally willing to do so (Table 3).

Some indicators of socioeconomic status were significantly associated with perceived ability and willingness to self-isolate. Respondents who held post-secondary but below degree-level education qualifications were less able (90.2% vs. 93.1%; aOR:0.59; 95% CI:0.36,0.97) and less willing (90.9% vs. 94.9% aOR:0.50; 95% CI:0.29,0.85) to self-isolate than respondents educated to degree level (Table 3). Those with household incomes below



Table 3. Ability and willingness to self-isolate by sociodemographic factors

|                                                  | Able to self-isolate yes vs no (N=2,002) <sup>a</sup> |            |                           |                           | Willing to self-isolate yes vs no (N=1,978) <sup>a</sup> |            |                           |                        |
|--------------------------------------------------|-------------------------------------------------------|------------|---------------------------|---------------------------|----------------------------------------------------------|------------|---------------------------|------------------------|
|                                                  | N                                                     | Weighted % | Unadjusted OR (95% CI)    | Adjusted OR (95% CI)      | N                                                        | Weighted % | Unadjusted OR (95% CI)    | Adjusted OR (95% CI)   |
| <b>Self-isolation ability/willingness</b>        |                                                       |            |                           |                           |                                                          |            |                           |                        |
| Yes, I would                                     | 1,834                                                 | 87.0       |                           |                           | 1,847                                                    | 87.6       |                           |                        |
| No, I wouldn't                                   | 168                                                   | 8.0        |                           |                           | 131                                                      | 6.2        |                           |                        |
| Don't know                                       | 106                                                   | 5.0        |                           |                           | 130                                                      | 6.2        |                           |                        |
| <b>Age</b>                                       |                                                       |            |                           |                           |                                                          |            |                           |                        |
| 18-34                                            | 466                                                   | 90.8       | Ref                       | Ref <sup>b</sup>          | 457                                                      | 91.6       | Ref                       | Ref <sup>b</sup>       |
| 35-49                                            | 494                                                   | 90.0       | 0.91 (0.60-1.4)           | 1.3 (0.70-2.3)            | 508                                                      | 94.2       | 1.5 (0.95-2.5)            | 1.3 (0.65-2.7)         |
| 50-69                                            | 614                                                   | 92.2       | 1.2 (0.79-1.8)            | 1.5 (0.74-3.1)            | 627                                                      | 93.6       | 1.4 (0.87-2.1)            | 1.0 (0.46-2.3)         |
| 70 or older                                      | 262                                                   | 94.9       | <b>1.9 (1.0-3.6)*</b>     | 1.8 (0.52-6.4)            | 255                                                      | 94.4       | 1.6 (0.87-2.9)            | 1.5 (0.44-5.0)         |
| <b>Sex</b>                                       |                                                       |            |                           |                           |                                                          |            |                           |                        |
| Male                                             | 878                                                   | 90.7       | Ref                       | Ref <sup>b</sup>          | 878                                                      | 91.8       | Ref                       | Ref <sup>b</sup>       |
| Female                                           | 957                                                   | 92.5       | 1.3 (0.92-1.7)            | 1.2 (0.78-1.9)            | 969                                                      | 94.9       | <b>1.7 (1.2-2.4)**</b>    | <b>2.1 (1.2-3.5)**</b> |
| <b>Ethnicity</b>                                 |                                                       |            |                           |                           |                                                          |            |                           |                        |
| White                                            | 1,737                                                 | 92.1       | Ref                       | Ref <sup>b</sup>          | 1,751                                                    | 93.7       | Ref                       | Ref <sup>b</sup>       |
| Black, Asian and minority ethnic                 | 89                                                    | 84.8       | <b>0.47 (0.27-0.82)**</b> | <b>0.33 (0.15-0.72)**</b> | 86                                                       | 87.8       | <b>0.48 (0.26-0.9)*</b>   | 0.70 (0.28-1.8)        |
| <b>Marital status</b>                            |                                                       |            |                           |                           |                                                          |            |                           |                        |
| Married, civil partnership, or living as married | 1,128                                                 | 92.3       | Ref                       | Ref <sup>b</sup>          | 1,143                                                    | 94.5       | Ref                       | Ref <sup>b</sup>       |
| Separated, divorced, or widowed                  | 215                                                   | 90.7       | 0.80 (0.49-1.3)           | 0.94 (0.44-2.0)           | 219                                                      | 92.8       | 0.77 (0.44-1.4)           | 0.74 (0.33-1.7)        |
| Never married                                    | 482                                                   | 90.3       | 0.77 (0.54-1.1)           | 1.1 (0.60-1.9)            | 477                                                      | 91.0       | <b>0.59 (0.40-0.87)**</b> | 0.88 (0.45-1.7)        |
| <b>Area of residence</b>                         |                                                       |            |                           |                           |                                                          |            |                           |                        |
| London                                           | 241                                                   | 91.6       | Ref                       | -                         | 243                                                      | 92.7       | Ref                       | -                      |
| North of England                                 | 427                                                   | 91.2       | 0.93 (0.54-1.6)           |                           | 430                                                      | 93.7       | 1.2 (0.64-2.1)            |                        |
| Midlands and East of England                     | 465                                                   | 93.0       | 1.2 (0.69-2.1)            |                           | 465                                                      | 93.9       | 1.2 (0.67-2.2)            |                        |
| South of England                                 | 408                                                   | 89.5       | 0.76 (0.45-1.3)           |                           | 411                                                      | 92.2       | 0.92 (0.51-1.6)           |                        |
| N. Ireland, Scotland, Wales                      | 294                                                   | 92.7       | 1.2 (0.63-2.1)            |                           | 297                                                      | 94.3       | 1.3 (0.66-2.5)            |                        |
| <b>Education</b>                                 |                                                       |            |                           |                           |                                                          |            |                           |                        |
| Degree or above                                  | 584                                                   | 93.1       | Ref                       | Ref <sup>c</sup>          | 591                                                      | 94.9       | Ref                       | Ref <sup>c</sup>       |

|                                                 |     |      |                            |                            |     |      |                           |                           |
|-------------------------------------------------|-----|------|----------------------------|----------------------------|-----|------|---------------------------|---------------------------|
| Post-secondary                                  | 332 | 90.2 | 0.68 (0.43-1.1)            | <b>0.59 (0.36-0.97)*</b>   | 329 | 90.9 | <b>0.53 (0.32-0.88)*</b>  | <b>0.50 (0.29-0.85)*</b>  |
| Secondary or below                              | 863 | 91.3 | 0.78 (0.53-1.2)            | 0.71 (0.47-1.1)            | 873 | 93.6 | 0.77 (0.50-1.21)          | 0.99 (0.61-1.9)           |
| <b>Employment status</b>                        |     |      |                            |                            |     |      |                           |                           |
| Working full time                               | 799 | 91.4 | Ref                        | Ref <sup>b</sup>           | 804 | 93.6 | Ref                       | Ref <sup>b</sup>          |
| Working part time                               | 255 | 90.4 | 0.88 (0.55-1.4)            | 0.85 (0.45-1.6)            | 263 | 92.9 | 0.90 (0.53-1.5)           | 0.58 (0.29-1.2)           |
| Full time student                               | 105 | 93.8 | 1.37 (0.62-3.0)            | 1.6 (0.50-5.4)             | 97  | 89.0 | 0.55 (0.29-1.1)           | 0.49 (0.17-1.4)           |
| Retired                                         | 450 | 95.1 | <b>1.8 (1.1-3.0)*</b>      | 1.2 (0.48-3.1)             | 444 | 94.7 | 1.2 (0.74- 2.0)           | 0.78 (0.33-1.9)           |
| Unemployed or not working                       | 185 | 89.8 | 0.81 (0.49-1.3)            | 1.1 (0.49-2.3)             | 191 | 94.1 | 1.1 (0.56-2.0)            | 2.4 (0.75-7.5)            |
| <b>Household income</b>                         |     |      |                            |                            |     |      |                           |                           |
| £50,000 and over                                | 405 | 95.5 | Ref                        | Ref <sup>d</sup>           | 393 | 94.7 | Ref                       | Ref <sup>d</sup>          |
| £30,000 to £49,999                              | 417 | 90.7 | <b>0.46 (0.27-0.81)**</b>  | <b>0.44 (0.25-0.77)**</b>  | 424 | 93.6 | 0.81 (0.46-1.4)           | 0.73 (0.40-1.3)           |
| £20,000 to £29,999                              | 311 | 92.6 | 0.60 (0.33-1.1)            | 0.54 (0.28-1.0)            | 308 | 91.9 | 0.63 (0.35-1.1)           | 0.57 (0.30-1.1)           |
| <£20,000                                        | 363 | 88.3 | <b>0.36 (0.21-0.62)***</b> | <b>0.31 (0.16-0.58)***</b> | 383 | 93.0 | 0.73 (0.41-1.3)           | 0.71 (0.36-1.4)           |
| <b>Savings</b>                                  |     |      |                            |                            |     |      |                           |                           |
| £25,000 or more                                 | 329 | 95.6 | Ref                        | Ref <sup>d</sup>           | 318 | 94.1 | Ref                       | Ref <sup>d</sup>          |
| £5,000 to £24,999                               | 319 | 95.2 | 0.93 (0.45-1.9)            | 1.2 (0.56-2.6)             | 317 | 95.8 | 1.5 (0.72-2.9)            | 1.5 (0.70-3.1)            |
| £1,000 to £4,999                                | 274 | 92.3 | 0.55 (0.28-1.1)            | 0.73 (0.36-1.5)            | 272 | 92.8 | 0.82 (0.44-1.6)           | 0.83 (0.42-1.6)           |
| £100 to £999                                    | 217 | 90.0 | <b>0.42 (0.22-0.81)*</b>   | 0.60 (0.29-1.3)            | 221 | 94.8 | 1.2 (0.56-2.5)            | 1.2 (0.53-2.6)            |
| Less than £100                                  | 232 | 84.4 | <b>0.25 (0.13-0.45)***</b> | <b>0.35 (0.18-0.68)**</b>  | 250 | 90.9 | 0.63 (0.34-1.2)           | 0.55 (0.28-1.1)           |
| <b>Housing tenure</b>                           |     |      |                            |                            |     |      |                           |                           |
| Own outright                                    | 576 | 93.8 | Ref                        | Ref <sup>d</sup>           | 575 | 95.0 | Ref                       | Ref <sup>d</sup>          |
| Own with mortgage/shared ownership              | 571 | 92.1 | 0.77 (0.50-1.2)            | 0.99 (0.58-1.7)            | 584 | 95.0 | 0.98 (0.59-1.6)           | 0.87 (0.47-1.6)           |
| Rented from private landlord                    | 277 | 89.1 | <b>0.53 (0.33-0.86)*</b>   | 0.71 (0.39-1.3)            | 297 | 94.3 | 0.85 (0.47-1.6)           | 0.82 (0.40-1.7)           |
| Rented from local authority/housing association | 188 | 87.9 | <b>0.49 (0.29-0.82)**</b>  | 0.68 (0.36-1.3)            | 188 | 90.0 | <b>0.47 (0.26-0.84)*</b>  | <b>0.39 (0.21-0.75)**</b> |
| Live with parents, family, or friends           | 197 | 92.9 | 0.85 (0.46-1.6)            | 1.3 (0.60-3.0)             | 178 | 88.1 | <b>0.39 (0.22-0.69)**</b> | <b>0.43 (0.20-0.95)*</b>  |

<sup>a</sup>Excluding those who responded "Don't know"; <sup>b</sup>Mutually adjusted for age, gender, ethnicity, marital status, education, employment status, household income, savings, and housing tenure; <sup>c</sup>Adjusted for age gender, ethnicity, marital status, employment status and housing tenure; <sup>d</sup>Adjusted for age, gender, ethnicity, marital status, and employment status; \*p<0.05, \*\*p<0.01, \*\*\*p<0.001

1  
2  
3 £20,000 were three times less likely to be able to self-isolate compared with those on  
4 household incomes of £50,000 and above (88.3% vs. 95.5%; aOR:0.31; 95% CI:0.16,0.58).  
5 Similarly, respondents with less than £100 in savings were three times less likely to be able  
6 to self-isolate compared with those with savings of £25,000 or more (84.8% vs. 95.6%;  
7 aOR:0.35; 95% CI:0.18,0.68). There was no effect on willingness to self-isolate by household  
8 income or amount of savings (Table 3).  
9  
10  
11  
12  
13  
14

15 Those in accommodation rented from a private landlord, local authority, or housing  
16 association were less likely to report being able to self-isolate, although this association was  
17 no longer significant when other sociodemographic factors were adjusted for. In terms of  
18 willingness to self-isolate, respondents renting accommodation from a local authority or  
19 housing association (aOR:0.39; 95% CI:0.21,0.75) and those living with parents, family or  
20 friends (aOR:0.43; 95% CI:0.20,0.95) were less likely to be willing to self-isolate compared  
21 with those who owned their home outright (Table 3).  
22  
23  
24  
25  
26  
27

## 28 Discussion

29 This study reports on the perceptions and behaviour of the UK adult population in the two  
30 days following the UK Government's introduction of recommendations on social distancing  
31 on March 16 2020 [6]. We found high levels of self-reported behaviour change. Notably, the  
32 most-adopted measures, washing hands more frequently with soap and water, using hand  
33 sanitiser, and covering nose and mouth when sneezing or coughing, prominently featured in  
34 national public health campaigns from relatively early on in the epidemic [4], and mirrors  
35 results seen in previous pandemics [13]. However, there were marked differences between  
36 the perceived effectiveness and adoption of NPIs. This suggests that lack of knowledge on  
37 what measures are effective against COVID-19 is not a key driver of compliance in the UK  
38 population. In contrast, a similar study conducted in Hong Kong showed comparatively high  
39 perceived effectiveness and adoption of preventive measures [11].  
40  
41  
42  
43  
44  
45  
46  
47  
48  
49

50 Our results highlighted significant differences across demographic and socioeconomic strata  
51 for social distancing behaviour, ability to work from home, and the ability and willingness of  
52 people to self-isolate. Adoption of social distancing measures was almost twice as likely in  
53 people over 70 compared to adults aged 18 to 34 years. Notably, those that were single  
54 were less likely to practice social distancing. There was a strong association between  
55 socioeconomic deprivation and ability to adopt NPIs. Although willingness to self-isolate  
56  
57  
58  
59  
60

1  
2  
3 was high overall, those from more disadvantaged backgrounds were less likely to be able to  
4 work from home or self-isolate if needed, suggesting the existence of structural barriers to  
5 adopting preventive behaviours in these groups.  
6  
7  
8  
9

10 The strength of this study is in the representative sample of the UK adult population, the  
11 ability to achieve our sample size quickly, and the timeliness in relation to changing  
12 government recommendations. This study has three limitations. First, with an online  
13 approach, responses of those without internet access were under-represented. Second, the  
14 survey tool consisted of predominantly closed-ended questions. Thus, we were unable to  
15 explore responses in more depth. Third, surveys collecting self-report data are generally  
16 subject to limitations including honesty, introspective ability, and interpretation of the  
17 questions.  
18  
19  
20  
21  
22  
23  
24

25 Our findings highlight the stark choices faced by those in lower socioeconomic groups and  
26 suggest that unless the government intervenes to support these individuals, the impact of  
27 this epidemic will likely be felt unequally in our society. Not only this, but if a large  
28 proportion of the population continues to work while unwell, low compliance will render the  
29 various forms of social distancing less effective, as low-income workers are forced to choose  
30 between financial and physical health. Indeed, this behaviour has already been observed in  
31 the workplace in previous pandemics: workers without access to paid sick leave were more  
32 likely to work while unwell than those with paid sick leave [14]. A study in China after the  
33 H7N9 epidemic found that only 7% of people reported willingness to self-quarantine [15].  
34 Also, during the Middle East Respiratory Syndrome (MERS) outbreak in South Korea in 2015,  
35 there was heterogeneous uptake of preventive interventions [16].  
36  
37  
38  
39  
40  
41  
42  
43  
44

45 In the absence of a vaccine and treatments over the short-term, high compliance with social  
46 distancing, self-isolation and household quarantine is paramount to reduce transmission and  
47 the impact of COVID-19. And as the epidemic evolves, it is likely that compliance with  
48 preventive behaviours will continue to evolve too. NPI compliance, risk perception and  
49 behaviour are not consistent across cultures, social status or time. Indeed, previous studies  
50 have shown that perceptions and behaviours often change over time [13]. Therefore,  
51 current modelling projections of the impact of NPIs on morbidity and mortality are always  
52 provisional [7]. Future COVID-19 models should explore the variation captured in this and  
53 previous studies to better estimate the impact of differential uptake of NPIs in the UK and  
54  
55  
56  
57  
58  
59  
60

1  
2  
3 beyond. It is also important to monitor behaviour throughout the epidemic to know when to  
4 implement further public health messaging, and when further or alternative government  
5 actions might be required, to mitigate falling compliance.  
6  
7  
8  
9

### 10 **Conclusions and policy implications**

11 Our findings highlight that those most economically disadvantaged in society are less able to  
12 comply with certain NPIs, likely in part due to their financial situation. Whilst one approach  
13 may be to better tailor public health messaging to this subpopulation, this must be done  
14 alongside considered fiscal and monetary policy to mitigate the financial costs of following  
15 government public health advice. Therefore, it is imperative that the UK Government, and  
16 governments around the world, quickly develop and implement policies to support the most  
17 vulnerable, in a bid to minimise the long-term social and economic harm caused by COVID-  
18 19. Government policy should recognise the disparity in impact across socioeconomic  
19 groups, particularly across the labour market, and should aim to support workers equitably  
20 across the income spectrum. This would likely help increase compliance across the  
21 population to the levels required to suppress transmission and thereby reduce the strain on  
22 national health services, both in the UK and abroad. Although the UK Government has since  
23 announced a range of measures to support public services, individuals, and businesses, in  
24 part to facilitate compliance with current lockdown measures [17], it is uncertain how long  
25 these protections will be in place for and whether they will continue once lockdown  
26 restrictions are lifted.  
27  
28  
29  
30  
31  
32  
33  
34  
35  
36  
37  
38  
39

### 40 **Acknowledgments**

41 The survey was conducted by YouGov on behalf of the Patient Experience Research Centre,  
42 School of Public Health, Imperial College London. Questions were developed by the authors,  
43 and YouGov provided suggestions to improve clarity and understandability.  
44  
45  
46  
47

48 We thank Prof. Kin On Kwok, Ms. Wan In Wei, Prof. Samuel Yeung Shan Wong and the  
49 research team in the Division of Infectious Diseases of JC School of Public Health and Primary  
50 Care, The Chinese University of Hong Kong, Hong Kong Special Administrative Region, China  
51 for permission to use their survey instrument and translating it into English.  
52  
53  
54  
55

### 56 **Contributors**

57  
58  
59  
60

1  
2  
3 CJA, LB, RR, PP and HW designed the study. CJA, JWE and CV analysed the data and  
4 performed the statistical analyses. CJA, LB, RR, CV and HW drafted the initial manuscript. All  
5 authors reviewed the drafted manuscript for critical content and approved the final version.  
6  
7 The corresponding author attests that all listed authors meet authorship criteria and that no  
8 others meeting the criteria have been omitted. CJA and HW are the guarantors.  
9  
10  
11  
12

### 13 **Declaration of interests**

14 The authors declare that they have no know competing financial interests or personal  
15 relationships that could have appeared to influence the work reported in this paper.  
16  
17  
18  
19

### 20 **Funding**

21 The study was supported by Imperial NIHR Research Capability Funding (Award No. P81291).  
22 Professor Helen Ward is a National Institute for Health Research (NIHR) Senior Investigator  
23 (Award No. P75372). The views expressed in this article are those of the authors and not  
24 necessarily those of the NHS, the NIHR, or the Department of Health.  
25  
26  
27  
28  
29

### 30 **Data sharing**

31 The survey instrument is freely available to download from the School of Public Health,  
32 Imperial College London COVID-19 resources webpage: [https://www.imperial.ac.uk/mrc-](https://www.imperial.ac.uk/mrc-global-infectious-disease-analysis/news--wuhan-coronavirus/covid-19-resources/)  
33 [global-infectious-disease-analysis/news--wuhan-coronavirus/covid-19-resources/](https://www.imperial.ac.uk/mrc-global-infectious-disease-analysis/news--wuhan-coronavirus/covid-19-resources/)  
34  
35  
36  
37

38 The data used for the analyses are available from the corresponding author on request.  
39  
40

### 41 **References**

- 42 1. World Health Organisation. Rolling updates on coronavirus disease (COVID-19)  
43 2020 [Available from: [https://www.who.int/emergencies/diseases/novel-coronavirus-](https://www.who.int/emergencies/diseases/novel-coronavirus-2019/events-as-they-happen)  
44 [2019/events-as-they-happen](https://www.who.int/emergencies/diseases/novel-coronavirus-2019/events-as-they-happen).  
45  
46
- 47 2. ECDC. Coronavirus disease 2019 (COVID-19) pandemic: increased transmission in the  
48 EU/EEA and the UK – seventh update Stockholm; 2020 25 March 2020  
49
- 50 3. Public Health England. Number of coronavirus (COVID-19) cases and risk in the UK  
51 2020 [Available from: [https://www.gov.uk/guidance/coronavirus-covid-19-information-for-](https://www.gov.uk/guidance/coronavirus-covid-19-information-for-the-public)  
52 [the-public](https://www.gov.uk/guidance/coronavirus-covid-19-information-for-the-public).  
53  
54
- 55 4. Russell P. New Coronavirus: UK Public Health Campaign Launched. Medscape. 2020.  
56  
57
- 58 5. Department of Health and Social Care. Coronavirus (COVID-19) action plan 2020  
59 [Available from: <https://www.gov.uk/government/publications/coronavirus-action-plan>.  
60

- 1  
2  
3 6. UK Government. PM statement on coronavirus: 16 March 2020 2020 [Available  
4 from: [https://www.gov.uk/government/speeches/pm-statement-on-coronavirus-16-march-](https://www.gov.uk/government/speeches/pm-statement-on-coronavirus-16-march-2020)  
5 [2020](https://www.gov.uk/government/speeches/pm-statement-on-coronavirus-16-march-2020).  
6  
7
- 8 7. Ferguson NM, Laydon D, Nedjati-Gilani G, et al. Impact of non-pharmaceutical  
9 interventions (NPIs) to reduce COVID19 mortality and healthcare demand. 2020.  
10
- 11 8. Atchison CJ, Bowman L, Eaton JW, et al. Report 10: Public Response to UK  
12 Government Recommendations on COVID-19: Population Survey, 17-18 March 2020 2020.  
13
- 14 9. YouGov. ESOMAR28: 28 questions to help online research buyers14 March 2020.  
15 Available from:  
16 [http://doc.ukdataservice.ac.uk/doc/7647/mrdoc/pdf/7647\\_methodology\\_esomar\\_28.pdf](http://doc.ukdataservice.ac.uk/doc/7647/mrdoc/pdf/7647_methodology_esomar_28.pdf).  
17  
18
- 19 10. Office for National Statistics. UK 2011 census data [Available from:  
20 <https://www.ons.gov.uk/census/2011census>.  
21  
22
- 23 11. Kwok KO, Li KK, Chan HHH, et al. Community responses during the early phase of the  
24 COVID-19 epidemic in Hong Kong: risk perception, information exposure and preventive  
25 measures. medRxiv. 2020.  
26
- 27 12. Public Health England. Stay at home: guidance for households with possible  
28 coronavirus (COVID-19) infection 2020 [Available from:  
29 [https://www.gov.uk/government/publications/covid-19-stay-at-home-guidance/stay-at-](https://www.gov.uk/government/publications/covid-19-stay-at-home-guidance/stay-at-home-guidance-for-households-with-possible-coronavirus-covid-19-infection)  
30 [home-guidance-for-households-with-possible-coronavirus-covid-19-infection](https://www.gov.uk/government/publications/covid-19-stay-at-home-guidance/stay-at-home-guidance-for-households-with-possible-coronavirus-covid-19-infection).  
31  
32  
33
- 34 13. Bults M, Beaujean DJ, Richardus JH, Voeten HA. Perceptions and behavioral  
35 responses of the general public during the 2009 influenza A (H1N1) pandemic: a systematic  
36 review. *Disaster Med Public Health Prep*. 2015;9(2):207-19. doi: 10.1017/dmp.2014.160.  
37  
38
- 39 14. Ahmed F, Zviedrite N, Uzicanin A. Effectiveness of workplace social distancing  
40 measures in reducing influenza transmission: a systematic review. *BMC Public Health*.  
41 2018;18(1):518. doi: 10.1186/s12889-018-5446-1.  
42  
43
- 44 15. Goodwin R, Sun S. Public perceptions and reactions to H7N9 in Mainland China. *J*  
45 *Infect*. 2013;67(5):458-62. doi: 10.1016/j.jinf.2013.06.014. Epub Jul 5.  
46  
47
- 48 16. Jang WM, Cho S, Jang DH, et al. Preventive Behavioral Responses to the 2015 Middle  
49 East Respiratory Syndrome Coronavirus Outbreak in Korea. *Int J Environ Res Public Health*.  
50 2019;16(12).(pii):ijerph16122161. doi: 10.3390/ijerph.  
51  
52
- 53 17. UK Government. Support for those affected by Covid-19 2020 [Available from:  
54 <https://www.gov.uk/government/publications/support-for-those-affected-by-covid-19>.  
55  
56  
57  
58  
59  
60

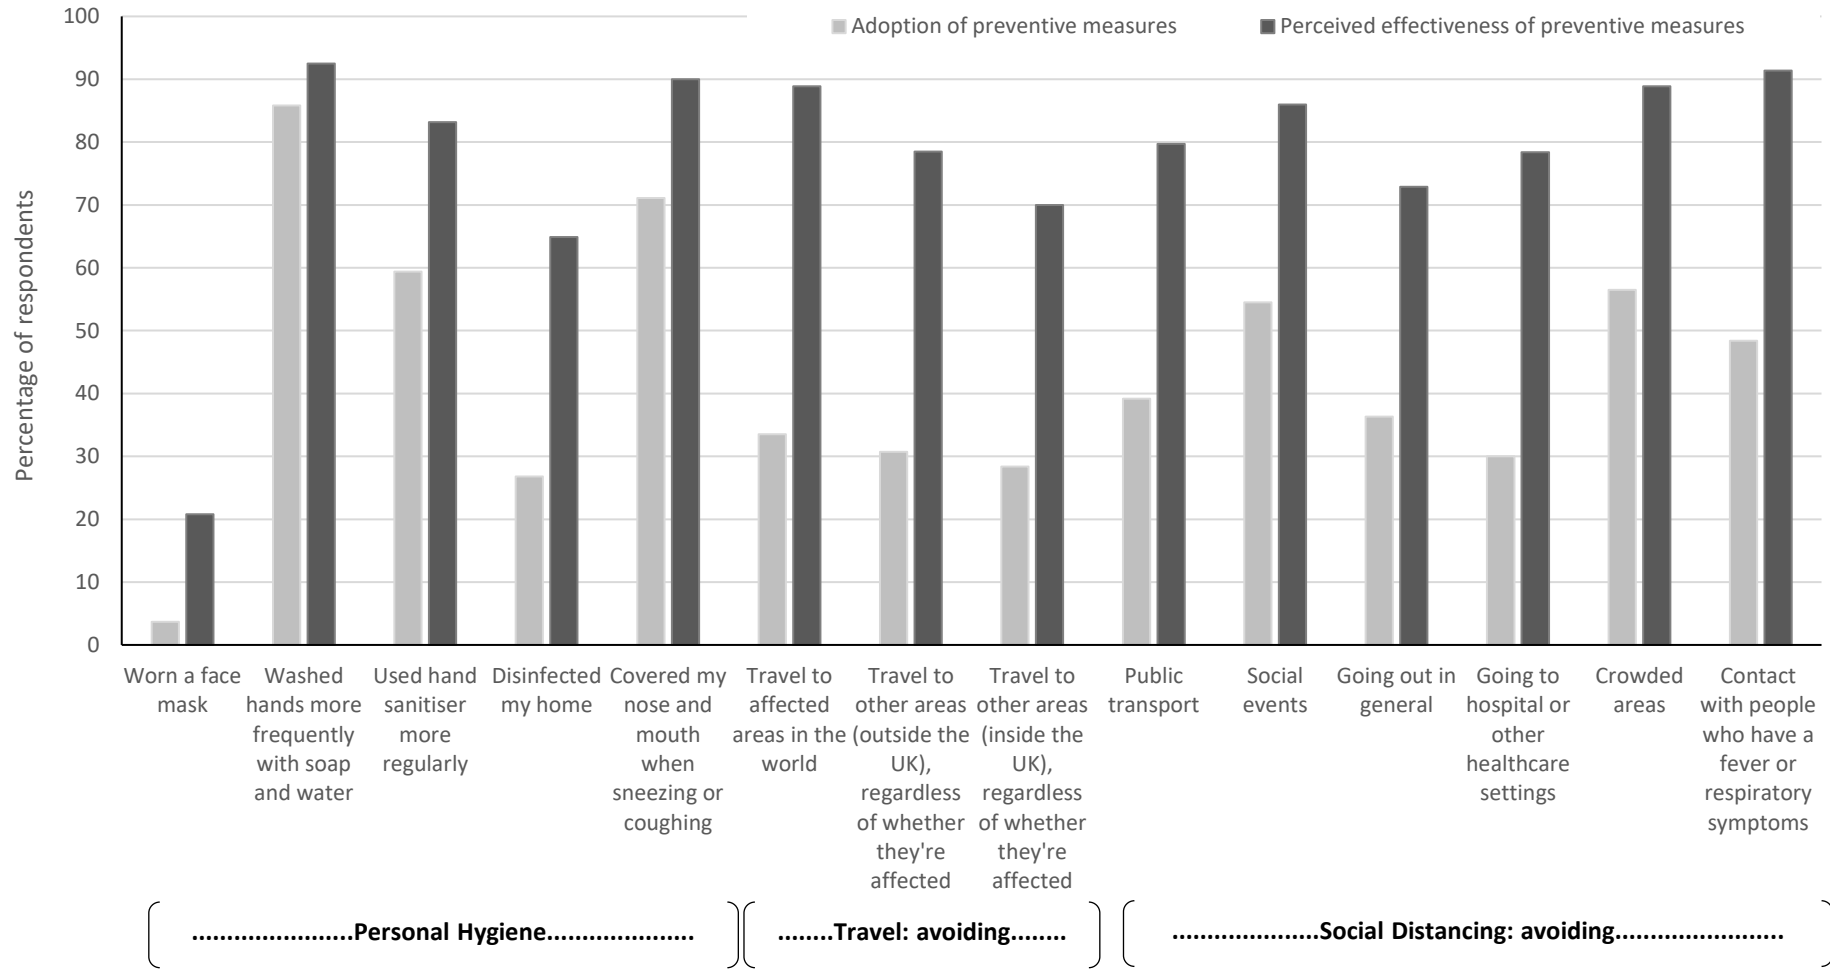



1  
2  
3  
4  
5  
6  
7  
8  
9  
10  
11  
12  
13  
14  
15  
16  
17  
18  
19  
20  
21  
22  
23  
24  
25  
26  
27  
28  
29  
30  
31  
32  
33  
34  
35  
36  
37  
38  
39  
40  
41  
42  
43  
44  
45  
46  
47  
48  
49  
50  
51  
52  
53  
54  
55  
56  
57  
58  
59  
60STROBE Statement—Checklist of items that should be included in reports of *cross-sectional studies*

|                              | <b>Item No</b> | <b>Recommendation</b>                                                                                                                                                                                                                                                                                                                                                                                            |
|------------------------------|----------------|------------------------------------------------------------------------------------------------------------------------------------------------------------------------------------------------------------------------------------------------------------------------------------------------------------------------------------------------------------------------------------------------------------------|
| <b>Title and abstract</b>    | 1              | (a) Indicate the study's design with a commonly used term in the title or the abstract<br><b>PAGE 1 and 2</b><br>(b) Provide in the abstract an informative and balanced summary of what was done and what was found <b>PAGE 2</b>                                                                                                                                                                               |
| <b>Introduction</b>          |                |                                                                                                                                                                                                                                                                                                                                                                                                                  |
| Background/rationale         | 2              | Explain the scientific background and rationale for the investigation being reported<br><b>PAGE 4</b>                                                                                                                                                                                                                                                                                                            |
| Objectives                   | 3              | State specific objectives, including any prespecified hypotheses <b>PAGE 4</b>                                                                                                                                                                                                                                                                                                                                   |
| <b>Methods</b>               |                |                                                                                                                                                                                                                                                                                                                                                                                                                  |
| Study design                 | 4              | Present key elements of study design early in the paper <b>PAGE 5-6</b>                                                                                                                                                                                                                                                                                                                                          |
| Setting                      | 5              | Describe the setting, locations, and relevant dates, including periods of recruitment, exposure, follow-up, and data collection <b>PAGE 5-6</b>                                                                                                                                                                                                                                                                  |
| Participants                 | 6              | (a) Give the eligibility criteria, and the sources and methods of selection of participants <b>PAGE 5-6</b>                                                                                                                                                                                                                                                                                                      |
| Variables                    | 7              | Clearly define all outcomes, exposures, predictors, potential confounders, and effect modifiers. Give diagnostic criteria, if applicable <b>PAGE 5-7</b>                                                                                                                                                                                                                                                         |
| Data sources/<br>measurement | 8*             | For each variable of interest, give sources of data and details of methods of assessment (measurement). Describe comparability of assessment methods if there is more than one group <b>PAGE 5-6</b>                                                                                                                                                                                                             |
| Bias                         | 9              | Describe any efforts to address potential sources of bias <b>PAGE 5 and 7</b>                                                                                                                                                                                                                                                                                                                                    |
| Study size                   | 10             | Explain how the study size was arrived at <b>PAGE 5</b>                                                                                                                                                                                                                                                                                                                                                          |
| Quantitative variables       | 11             | Explain how quantitative variables were handled in the analyses. If applicable, describe which groupings were chosen and why <b>PAGE 7</b>                                                                                                                                                                                                                                                                       |
| Statistical methods          | 12             | (a) Describe all statistical methods, including those used to control for confounding<br><b>PAGE 7</b><br>(b) Describe any methods used to examine subgroups and interactions <b>PAGE 7</b><br>(c) Explain how missing data were addressed <b>N/A</b><br>(d) If applicable, describe analytical methods taking account of sampling strategy<br><b>PAGE 7</b><br>(e) Describe any sensitivity analyses <b>N/A</b> |
| <b>Results</b>               |                |                                                                                                                                                                                                                                                                                                                                                                                                                  |
| Participants                 | 13*            | (a) Report numbers of individuals at each stage of study—eg numbers potentially eligible, examined for eligibility, confirmed eligible, included in the study, completing follow-up, and analysed <b>PAGE 8</b><br>(b) Give reasons for non-participation at each stage <b>N/A</b><br>(c) Consider use of a flow diagram <b>N/A</b>                                                                              |
| Descriptive data             | 14*            | (a) Give characteristics of study participants (eg demographic, clinical, social) and information on exposures and potential confounders <b>PAGE 8-15</b><br>(b) Indicate number of participants with missing data for each variable of interest<br><b>Tables 1-3</b>                                                                                                                                            |
| Outcome data                 | 15*            | Report numbers of outcome events or summary measures <b>PAGE 8-15</b>                                                                                                                                                                                                                                                                                                                                            |
| Main results                 | 16             | (a) Give unadjusted estimates and, if applicable, confounder-adjusted estimates and their precision (eg, 95% confidence interval). Make clear which confounders were adjusted for and why they were included <b>PAGE 11-15; Tables 2-3</b>                                                                                                                                                                       |

(b) Report category boundaries when continuous variables were categorized **PAGE 8-15; Tables 1-3**

(c) If relevant, consider translating estimates of relative risk into absolute risk for a meaningful time period **N/A**

|                          |    |                                                                                                                                                                                              |
|--------------------------|----|----------------------------------------------------------------------------------------------------------------------------------------------------------------------------------------------|
| Other analyses           | 17 | Report other analyses done—eg analyses of subgroups and interactions, and sensitivity analyses <b>PAGE 10-15; Tables 2-3</b>                                                                 |
| <b>Discussion</b>        |    |                                                                                                                                                                                              |
| Key results              | 18 | Summarise key results with reference to study objectives <b>PAGE 16</b>                                                                                                                      |
| Limitations              | 19 | Discuss limitations of the study, taking into account sources of potential bias or imprecision. Discuss both direction and magnitude of any potential bias <b>PAGE 17</b>                    |
| Interpretation           | 20 | Give a cautious overall interpretation of results considering objectives, limitations, multiplicity of analyses, results from similar studies, and other relevant evidence <b>PAGE 16-18</b> |
| Generalisability         | 21 | Discuss the generalisability (external validity) of the study results <b>PAGE 17-18</b>                                                                                                      |
| <b>Other information</b> |    |                                                                                                                                                                                              |
| Funding                  | 22 | Give the source of funding and the role of the funders for the present study and, if applicable, for the original study on which the present article is based <b>PAGE 19</b>                 |

\*Give information separately for exposed and unexposed groups.

**Note:** An Explanation and Elaboration article discusses each checklist item and gives methodological background and published examples of transparent reporting. The STROBE checklist is best used in conjunction with this article (freely available on the Web sites of PLoS Medicine at <http://www.plosmedicine.org/>, Annals of Internal Medicine at <http://www.annals.org/>, and Epidemiology at <http://www.epidem.com/>). Information on the STROBE Initiative is available at [www.strobe-statement.org](http://www.strobe-statement.org).

# BMJ Open

## Early perceptions and behavioural responses during the COVID-19 pandemic: A cross-sectional survey of UK Adults

|                                 |                                                                                                                                                                                                                                                                                                                                                                                                                                                                                                                                                                                                                                                                                                                                                                                                                                                                                                                                                                                                                       |
|---------------------------------|-----------------------------------------------------------------------------------------------------------------------------------------------------------------------------------------------------------------------------------------------------------------------------------------------------------------------------------------------------------------------------------------------------------------------------------------------------------------------------------------------------------------------------------------------------------------------------------------------------------------------------------------------------------------------------------------------------------------------------------------------------------------------------------------------------------------------------------------------------------------------------------------------------------------------------------------------------------------------------------------------------------------------|
| Journal:                        | <i>BMJ Open</i>                                                                                                                                                                                                                                                                                                                                                                                                                                                                                                                                                                                                                                                                                                                                                                                                                                                                                                                                                                                                       |
| Manuscript ID                   | bmjopen-2020-043577.R1                                                                                                                                                                                                                                                                                                                                                                                                                                                                                                                                                                                                                                                                                                                                                                                                                                                                                                                                                                                                |
| Article Type:                   | Original research                                                                                                                                                                                                                                                                                                                                                                                                                                                                                                                                                                                                                                                                                                                                                                                                                                                                                                                                                                                                     |
| Date Submitted by the Author:   | 31-Oct-2020                                                                                                                                                                                                                                                                                                                                                                                                                                                                                                                                                                                                                                                                                                                                                                                                                                                                                                                                                                                                           |
| Complete List of Authors:       | Atchison, Christina; Imperial College London, Patient Experience Research Centre, School of Public Health<br>Bowman, Leigh; Imperial College London, MRC Centre for Global Infectious Disease Analysis and Abdul Latif Jameel Institute for Disease and Emergency Analytics (J-IDEA), School of Public Health<br>Vrinten, Charlotte; Imperial College London, Centre for Health Economics & Policy Innovation, Department of Economics & Public Policy, Imperial College Business School<br>Redd, Rozlyn; Imperial College London, Patient Experience Research Centre, School of Public Health<br>Pristerà, Philippa ; Imperial College London, Patient Experience Research Centre, School of Public Health<br>Eaton, Jeffrey; Imperial College London, MRC Centre for Global Infectious Disease Analysis and Abdul Latif Jameel Institute for Disease and Emergency Analytics (J-IDEA), School of Public Health<br>Ward, Helen; Imperial College London, Patient Experience Research Centre, School of Public Health |
| <b>Primary Subject Heading</b>: | Public health                                                                                                                                                                                                                                                                                                                                                                                                                                                                                                                                                                                                                                                                                                                                                                                                                                                                                                                                                                                                         |
| Secondary Subject Heading:      | Epidemiology, Infectious diseases                                                                                                                                                                                                                                                                                                                                                                                                                                                                                                                                                                                                                                                                                                                                                                                                                                                                                                                                                                                     |
| Keywords:                       | COVID-19, EPIDEMIOLOGY, Public health < INFECTIOUS DISEASES, INFECTIOUS DISEASES                                                                                                                                                                                                                                                                                                                                                                                                                                                                                                                                                                                                                                                                                                                                                                                                                                                                                                                                      |
|                                 |                                                                                                                                                                                                                                                                                                                                                                                                                                                                                                                                                                                                                                                                                                                                                                                                                                                                                                                                                                                                                       |

SCHOLARONE™  
Manuscripts



I, the Submitting Author has the right to grant and does grant on behalf of all authors of the Work (as defined in the below author licence), an exclusive licence and/or a non-exclusive licence for contributions from authors who are: i) UK Crown employees; ii) where BMJ has agreed a CC-BY licence shall apply, and/or iii) in accordance with the terms applicable for US Federal Government officers or employees acting as part of their official duties; on a worldwide, perpetual, irrevocable, royalty-free basis to BMJ Publishing Group Ltd ("BMJ") its licensees and where the relevant Journal is co-owned by BMJ to the co-owners of the Journal, to publish the Work in this journal and any other BMJ products and to exploit all rights, as set out in our [licence](#).

The Submitting Author accepts and understands that any supply made under these terms is made by BMJ to the Submitting Author unless you are acting as an employee on behalf of your employer or a postgraduate student of an affiliated institution which is paying any applicable article publishing charge ("APC") for Open Access articles. Where the Submitting Author wishes to make the Work available on an Open Access basis (and intends to pay the relevant APC), the terms of reuse of such Open Access shall be governed by a Creative Commons licence – details of these licences and which [Creative Commons](#) licence will apply to this Work are set out in our licence referred to above.

Other than as permitted in any relevant BMJ Author's Self Archiving Policies, I confirm this Work has not been accepted for publication elsewhere, is not being considered for publication elsewhere and does not duplicate material already published. I confirm all authors consent to publication of this Work and authorise the granting of this licence.

1  
2  
3 **Early perceptions and behavioural responses during the COVID-19 pandemic: A cross-**  
4 **sectional survey of UK Adults**  
5  
6  
7

8 Christina J Atchison<sup>1</sup>, Leigh Bowman<sup>2</sup>, Charlotte Vrinten<sup>3</sup>, Rozlyn Redd<sup>1</sup>, Philippa Pristerà<sup>1</sup>,  
9 Jeffrey W Eaton<sup>2</sup>, Helen Ward<sup>1,2</sup>  
10  
11

12  
13 1 Patient Experience Research Centre, School of Public Health, Imperial College London, UK

14 2 MRC Centre for Global Infectious Disease Analysis and Abdul Latif Jameel Institute for  
15 Disease and Emergency Analytics (J-IDEA), School of Public Health, Imperial College London,  
16 UK  
17  
18

19 3 Centre for Health Economics & Policy Innovation, Department of Economics & Public  
20 Policy, Imperial College Business School, Imperial College London, UK  
21  
22  
23

24  
25 **Corresponding author:**

26 Dr Christina J Atchison, Principal Academic Clinical Fellow

27 [christina.atchison11@imperial.ac.uk](mailto:christina.atchison11@imperial.ac.uk)

28 Patient Experience Research Centre (PERC), Imperial College London, St Mary's Campus,  
29 Norfolk Place, Paddington, London W2 1PG  
30

31 ORCID ID: <https://orcid.org/0000-0001-8304-7389>  
32

33  
34 Dr Leigh Bowman, Teaching Fellow in Public Health

35 [leigh.bowman@imperial.ac.uk](mailto:leigh.bowman@imperial.ac.uk)  
36

37 Dr Charlotte Vrinten, Research Associate

38 [c.vrinten@imperial.ac.uk](mailto:c.vrinten@imperial.ac.uk)  
39

40 Dr Rozlyn Redd, Research Associate

41 [r.redd@imperial.ac.uk](mailto:r.redd@imperial.ac.uk)  
42

43 Dr Philippa Pristerà, Research Associate

44 [p.pristera@imperial.ac.uk](mailto:p.pristera@imperial.ac.uk)  
45

46 Dr Jeffrey W Eaton, Senior Lecturer

47 [jeffrey.eaton@imperial.ac.uk](mailto:jeffrey.eaton@imperial.ac.uk)  
48

49 Prof. Helen Ward, Professor of Public Health

50 [h.ward@imperial.ac.uk](mailto:h.ward@imperial.ac.uk)  
51  
52  
53  
54  
55  
56  
57

58 **Keywords:** COVID-19, novel coronavirus, epidemic, behavioural response, risk perceptions  
59  
60

**ABSTRACT**

**Objective:** To examine risk perceptions and behavioural responses of the UK adult population during the early phase of the COVID-19 epidemic in the UK.

**Design:** A cross-sectional survey

**Setting:** Conducted with a nationally representative sample of UK adults within 48 hours of the UK Government advising the public to stop non-essential contact with others and all unnecessary travel.

**Participants:** 2,108 adults living in the UK aged 18 years and over. Response rate was 84.3% (2,108/2,500). Data collected between March 17 and 18 2020.

**Main outcome measures:** Descriptive statistics for all survey questions, including number of respondents and weighted percentages. Robust Poisson regression used to identify sociodemographic variation in: (1) adoption of social-distancing measures, (2) ability to work from home, and (3) ability and (4) willingness to self-isolate.

**Results** Overall, 1,992 (94.2%) respondents reported at least one preventive measure: 85.8% washed their hands with soap more frequently; 56.5% avoided crowded areas and 54.5% avoided social events. Adoption of social-distancing measures was higher in those aged over 70 compared to younger adults aged 18 to 34 years (aRR:1.2; 95% CI:1.1,1.5). Those with lowest household income were three times less likely to be able to work from home (aRR:0.33; 95% CI:0.24 to 0.45) and less likely to be able to self-isolate (aRR:0.92; 95% CI:0.88 to 0.96). Ability to self-isolate was also lower in black and minority ethnic groups (aRR:0.89; 95% CI:0.79 to 1.0). Willingness to self-isolate was high across all respondents.

**Conclusions** Ability to adopt and comply with certain non-pharmaceutical interventions (NPIs) is lower in the most economically disadvantaged in society. Governments must implement appropriate social and economic policies to mitigate this. By incorporating these differences in NPIs among socio-economic subpopulations into mathematical models of COVID-19 transmission dynamics, our modelling of epidemic outcomes and response to COVID-19 can be improved.

**Keywords:** COVID-19, novel coronavirus, epidemic, pandemic, behavioural response, risk perceptions

## Article Summary

### Strengths and limitations of this study

- Nationally representative sample of the UK adult population
- Quick data collection during a rapidly evolving public health emergency
- Timeliness in relation to changing government response and recommendations
- The online approach excludes those without internet access
- Collecting self-report data are generally subject to limitations including honesty, introspective ability and interpretation of the questions.

For peer review only

## Introduction

On 31 December 2019, Chinese authorities notified the World Health Organisation (WHO) of an outbreak of pneumonia in Wuhan City, which was later classified as a new disease: COVID-19 [1]. Following identification of cases in countries outside China, on 30 January 2020, WHO declared the outbreak of COVID-19 a “Public Health Emergency of International Concern”[1]. In the UK, the first cases of COVID-19 were diagnosed at the end of January 2020, and community transmission was reported a few weeks later [2,3]. Government measures to control the epidemic were first announced on 22 January 2020 and included travel advice, information for those returning from affected countries, testing of suspected cases, isolation and contact tracing. This was followed in early February by a public health information campaign advising people to adopt hygiene measures to protect themselves and others, including more frequent handwashing with soap and water, using hand sanitiser if soap and water are not available, and covering mouth and nose with a tissue or sleeve when coughing or sneezing [4]. Then, on 3 March 2020, the UK Government published its action plan setting out the UK-wide response to the novel coronavirus. The UK Government’s response outlined measures in four key areas: containing the outbreak, delaying its spread, mitigating the impact, and research to improve diagnostics and treatment [5].

On March 16 2020, five days after the WHO declared the outbreak of COVID-19 a pandemic, the UK Prime Minister announced a shift to the delay phase of the UK response with measures aimed at suppressing the spread of the infection in the population through non-pharmaceutical interventions (NPIs), including social distancing of the whole population, isolation of cases for 7 days and quarantine of their household members for 14 days [6]. The public was advised to stop non-essential contact with others and all unnecessary travel: including working from home where possible and avoiding pubs, theatres, restaurants and other social venues [6]. This shift in response was prompted by a mathematical modelling study which showed that a combination of social distancing of the entire population, home isolation of cases and household quarantine of their family members (and possible school and university closure) was required to suppress transmission to a level that would enable the NHS to cope with the surge in cases requiring hospital admission and ventilation [7].

The effect of NPIs to reduce transmission rates is dependent on compliance with public health advice on social distancing. In the initial stages of the UK epidemic, this advice was voluntary, and not enforced by the government. This was criticised due to concern that



1  
2  
3 measures may not have the desired impact if a significant proportion of the population were  
4  
5 unable or unwilling to comply.  
6  
7

8 Protective behaviours are not uniformly adopted throughout a population during an  
9  
10 epidemic. Evidence from influenza outbreaks suggests that females are more likely to adopt  
11 NPIs than males [8,9]. In the UK, during the H1N1 pandemic, non-white ethnic groups were  
12 more likely to adopt hygiene and social distancing behaviours compared to white [10,11].  
13  
14 Employment status has also been associated with NPI adoption [12,13]. Evidence from  
15  
16 Australia during the H1N1 pandemic found those who were self-employed and who were  
17  
18 unable to work from home were most likely to report intentions to not comply with  
19  
20 preventative measures [13], suggesting that without support, it may be challenging for  
21  
22 individuals who are unable to work from home to comply with certain public health  
23  
24 recommendations. During the current COVID-19 pandemic, public risk perceptions and  
25  
26 knowledge has been explored in various countries [14-20]. However, only few have  
27  
28 identified the factors associated with greater adoption of preventative measures, or how  
29  
30 these associations vary by context. In Hong Kong, both greater understanding of COVID-19  
31  
32 and increased anxiety were associated with greater adoption of social distancing behaviours  
33  
34 [18].

35  
36 As such, this study aimed to assess reported behaviour and intention to comply with the  
37  
38 NPIs, as recommended by the UK Government at the time of the survey. Preliminary findings  
39  
40 were shared with the Scientific Advisory Group for Emergencies (SAGE), which advises the  
41  
42 UK Government's response to COVID-19 [21].

## 43 **Methods**

### 44 **Study design and sample**

45  
46 A cross-sectional survey of a nationally representative sample of the UK adult (aged 18 years  
47  
48 and over) population was conducted between March 17 and 18 2020, which followed the UK  
49  
50 Government's 16 March announcement to increase social distancing measures by advising  
51  
52 the public to stop non-essential contact with others and all unnecessary travel [6].  
53  
54

55  
56 The online survey was administered by YouGov, a market research company, to members of  
57  
58 its UK panel of 800,000+ individuals [22]. This panel includes individuals who have  
59  
60 specifically opted in to participate in online research activities. YouGov actively recruits hard-

1  
2  
3 to-reach individuals to this panel (such as younger people and those from ethnic minorities)  
4 via a network of partners with specific experience in recruiting these audiences for online  
5 activities or with access to a wide range of online sources that cater to these groups.  
6  
7  
8  
9

10 A sample of 2,108 adults was achieved through non-probabilistic quota sampling [22]. Emails  
11 were sent to 2,500 panellists from the base sample, randomly selecting panellists with  
12 particular age, sex, ethnicity and UK geographical region of residence characteristics to  
13 achieve quotas that matched the proportions of people with those characteristics in the UK  
14 2011 census data [23]. The response rate was 84.3% (2,108/2,500). No incentive was given  
15 to participate in the survey. The responding sample was weighted by age, sex, region and  
16 ethnicity to be representative of the UK adult population.  
17  
18  
19  
20  
21  
22

### 23 **Survey Instrument**

24 The questionnaire was adapted from a survey used in a similar study conducted in Hong  
25 Kong [24]. The questionnaire had four components: (1) socio-demographic characteristics,  
26 (2) risk perceptions towards COVID-19, (3) preventive behaviours, and (4) ability and  
27 willingness to self-isolate.  
28  
29  
30  
31  
32

33 *Socio-demographic characteristics* consisted of sex, age, ethnicity, marital status, caring  
34 responsibilities, UK area of residence, and socio-economic status (SES). SES was assessed  
35 using five indicators: education level, employment status, household income, savings, and  
36 household tenure.  
37  
38  
39  
40  
41

42 *Risk perceptions towards COVID-19* were measured by perceived susceptibility and  
43 perceived severity. Susceptibility was measured by asking respondents about perceived  
44 likelihood of being infected with COVID-19 under the UK Government's current preventive  
45 measures. Severity was measured by asking respondents about perceived seriousness of  
46 symptoms if they were infected with COVID-19.  
47  
48  
49  
50  
51

52 *Preventive behaviours* included information on perceived effectiveness and actual adoption  
53 of preventive behaviours (to protect oneself and others), to prevent both contracting  
54 COVID-19 and onward transmission, and were collected under three categories: (1) hygiene  
55 practices (wearing a face mask, washing hands more frequently with soap and water, using  
56 hand sanitiser more regularly, disinfecting the home, covering nose and mouth when  
57  
58  
59  
60

1  
2  
3 sneezing or coughing) (2) travel avoidance (travel to affected countries and travel to areas  
4 inside and outside the UK, regardless of whether they were affected) (3) social distancing  
5 (avoiding public transport, social events, going out in general, going to hospital or other  
6 healthcare settings, crowded places, and contact with people who have a fever or  
7 respiratory symptoms).

8  
9  
10  
11  
12  
13 *Ability and willingness to self-isolate* were asked with the following questions:

- 14  
15 • If you were advised to do so by a healthcare professional, would you be:  
16 a. able to self-isolate? (Yes, I would / No, I wouldn't / Don't know)  
17 b. willing to self-isolate? (Yes, I would / No, I wouldn't / Don't know)  
18  
19  
20

21  
22 At the time the survey was conducted, Public Health England's operational definition of 'self-  
23 isolation' was *"if you have symptoms of coronavirus infection (COVID-19), however mild, do*  
24 *not leave your home (even to buy food or essentials) or have any visitors for 7 days from*  
25 *when your symptoms started. This includes not going to work, school or other public places,*  
26 *and avoiding public transport or taxis. Self-isolation is the same as voluntary*  
27 *quarantine."*[25]  
28  
29  
30  
31

32  
33 We worked with YouGov to optimise question clarity and ease of understanding for the UK  
34 population.  
35  
36

37  
38 The survey instrument is freely available to download from the School of Public Health,  
39 Imperial College London COVID-19 resources webpage:  
40 [http://www.imperial.ac.uk/medicine/departments/school-public-health/infectious-disease-  
41 epidemiology/mrc-global-infectious-disease-analysis/covid-19/covid-19-scientific-resources/  
42  
43  
44  
45](http://www.imperial.ac.uk/medicine/departments/school-public-health/infectious-disease-epidemiology/mrc-global-infectious-disease-analysis/covid-19/covid-19-scientific-resources/)

#### 46 **Data Collection**

47  
48 Data were collected between 1630 GMT on 17 March 2020 and 1030 GMT on 18 March  
49 2020. Participants identified for the sample were sent an email with a survey link. YouGov  
50 returned the anonymised data set to the Imperial College London research team for analysis.  
51  
52  
53

#### 54 **Data Analysis**

55  
56 Analyses were conducted in Stata 15 and SPSS version 25.  
57  
58  
59  
60

1  
2  
3 Descriptive statistics for all variables present the number of respondents and the weighted  
4 percentages. Percentages were weighted for age, sex, region and ethnicity to account for  
5 variation in response rates, so as to be representative of the population (18+ years) of the  
6 UK. Details of the weighting approach used and the sample population profile are in the  
7 Supplement, S1.  
8  
9  
10

11  
12  
13 For analysis, age, collected as discrete count in years, was collapsed into four age bands  
14 routinely used in the UK to report COVID-19 related data. Ethnicity data were collected using  
15 the 18 response categories used in the UK 2011 Census [23] but were collapsed into two  
16 categories (white / Black, Asian and minority ethnic (BAME)) because of small numbers of  
17 respondents in BAME groups.  
18  
19  
20  
21

22  
23 Robust Poisson regression, by estimating relative risk (RR), was used to identify  
24 sociodemographic variation in: (1) adoption of social-distancing measures, (2) ability to work  
25 from home, and (3) ability and (4) willingness to self-isolate. Adoption of social distancing  
26 measures was proxied by respondents reporting to have avoided crowded places and social  
27 events to protect themselves or others from COVID-19. RR is a relative measure of effect,  
28 which allows the comparison of a dependant variable (outcome) in one group relative to a  
29 reference group within the independent (explanatory) variable. For our outcomes of  
30 interest, an  $RR > 1$  would indicate that the group was more likely to (1) adopt social distancing  
31 measures, (2) be able to work from home, and (3) be able and (4) willing to self-isolate  
32 relative to the reference group for that independent variable.  
33  
34  
35  
36  
37  
38  
39  
40

41 Age and sex were retained in all the regression models as they are considered important  
42 confounders. Including as many explanatory variables as possible can dilute true associations  
43 and lead to large standard errors with wide and imprecise confidence intervals, or,  
44 conversely, identify spurious associations. The conventional technique is to first run the  
45 univariate analyses and then use only those variables which meet a pre-set cut-off for  
46 significance to run a multivariable model. This cut-off is often more liberal than the  
47 conventional cut-off for significance (e.g.,  $P < 0.20$ , instead of the usual  $P < 0.05$ ) since its  
48 purpose is to identify potential predictor variables rather than to test a hypothesis [26].  
49 Therefore, only variables that appeared to be associated ( $p < 0.20$ ) in the unadjusted analyses  
50 were considered in the adjusted analyses. Adjusted relative risk (aRR) and 95% confidence  
51 intervals (CI) were estimated. Associations with a p-value  $< 0.05$  in the adjusted analyses  
52  
53  
54  
55  
56  
57  
58  
59  
60

1  
2  
3 were considered to be statistically significant. We did not adjust our p-values for multiple  
4 comparisons to reduce type I errors for null associations because this increases type II errors  
5 for those associations that are not null [27,28]. Not adjusting for multiple comparisons in the  
6 context of this study is preferable because it will result in less errors of interpretation as the  
7 data under examination are not random numbers but actual observations on people.  
8 Furthermore, in the context of a global pandemic caused by an emerging infectious disease  
9 it may be better to explore leads that may turn out to be wrong than risk missing possibly  
10 important findings that could provide insights for control of the virus.  
11  
12  
13  
14  
15  
16  
17

18 We tested for collinearity between education level, employment status, household income,  
19 savings, and household tenure. For these categorical variables, collinearity was measured by  
20 examining bivariate relationships using Pearson's Chi-squared tests. Where collinearity was  
21 detected we ran separate adjusted regression analyses for those variables, using only other  
22 explanatory variables in those models that were not strongly correlated.  
23  
24  
25  
26  
27

### 28 **Patient and Public Involvement**

29 Prior to conducting the study, we distributed an online feedback form to communities across  
30 the UK using local networks of public partners and contacts, Twitter and via VOICE-  
31 global.org, an online platform for public involvement in research established by Newcastle  
32 University. We received 420 responses, including 328 from members of the public. The  
33 experiences and feedback shared guided our study design and scope, including the phrasing  
34 of the survey tool's closed-ended questions and the refinement of pre-populated answer  
35 choices.  
36  
37  
38  
39  
40  
41  
42

43 Study results will be shared with the public both by posting on the VOICE-global.org news  
44 page, on the research team's website, and through direct mail with those who consented to  
45 be contacted about our research and involvement activity.  
46  
47  
48  
49

### 50 **Ethical approval**

51 The Imperial College London Research Ethics Committee approved the study (Ref 20IC5861).  
52 Informed consent was obtained from those who chose to complete the survey after having  
53 read introductory information on its content and purpose.  
54  
55  
56  
57

### 58 **Results**

1  
2  
3 The overall sample is described in Table 1. There was lower response among people from  
4 minority ethnic groups and older age groups compared to the UK population profile  
5 (Supplement, S1 for full details of the sample profile compared to UK population profile). In  
6 summary, of the 2,108 respondents, 11.1% were 18 to 24 years old, and 13.5% were 70  
7 years or older. The majority of respondents were white (93.9%). In total, 43.4% were in full-  
8 time work and 14.1% were in part-time work.  
9

10  
11 Overall, 77.4% (1,640/2,108) of respondents reported being worried about the COVID-19  
12 outbreak in the UK. None of the 2,108 respondents had previously tested positive for COVID-  
13 19, and 47.5% (979/2,108) believed that it was likely they would be infected at some point in  
14 the future under the UK Government's preventive measures. If infected, just over half  
15 (56.9%) of respondents would expect to be moderately severely affected (e.g. may need  
16 self-care and rest in bed) (Table 1).  
17

18  
19 Accordingly, 94.2% of adults reported taking at least one preventive measure (to protect  
20 oneself and others) against COVID-19 infection: 85.8% washed their hands with soap more  
21 frequently; 56.5% avoided crowded areas; 54.5% avoided social events and 39.2% avoided  
22 public transport (Figure 1). Most reported that their behaviour change was in response to  
23 government guidance (71.3%). Preventive measures perceived to be most effective were  
24 washing hands more frequently with soap and water (92.5%), avoiding contact with people  
25 who have a fever or respiratory symptoms (91.4%), and covering nose and mouth when  
26 sneezing or coughing (90.0%) (Figure 1). Perceived effectiveness of preventive measures was  
27 higher than actual adoption for all measures. This was particularly marked for social  
28 distancing measures (Figure 1).  
29

### 30 31 32 33 34 35 36 37 38 39 40 41 42 43 44 45 **Adoption of social-distancing measures**

46  
47 Overall, 45.2% of respondents reported adopting social distancing measures (avoiding  
48 crowded places and avoiding social events) to protect themselves or others from COVID-19.  
49

50  
51 Table 2 shows the regression analysis results for adoption of social-distancing measures.  
52 Being 70 years or older (64.2% vs. 38.4%; aRR:1.2; 95% CI:1.1,1.5) was positively associated  
53 with greater adoption compared to younger adults aged 18 to 34 years. Compared with  
54 those who were married, in a civil partnership, or living as married (48.4%), respondents  
55 who were separated, divorced, or widowed (44.1%; aRR:0.75; 95% CI:0.64,0.87) or never  
56  
57  
58  
59  
60

1  
2  
3 married (38.4%; aRR:0.74; 0.63,0.88) were less likely to have adopted social distancing  
4 measures to prevent transmission of COVID-19. Respondents with £100 savings or less were  
5 a fifth less likely to have adopted social distancing measures compared to those with  
6 £25,000 or more in savings (43.5% vs. 48.4%; aRR:0.83; 95% CI:0.73,0.95) (Table 2).  
7  
8  
9

10  
11  
12 **Table 1. Demographics, socio-economic characteristics and COVID-19 risk perceptions,**  
13 **N=2,108**

| Characteristic                                             | No.  | Weighted % |
|------------------------------------------------------------|------|------------|
| <b>Demographic and socio-economic</b>                      |      |            |
| <b>Age (years)</b>                                         |      |            |
| 18-24                                                      | 218  | 11.1       |
| 25-34                                                      | 294  | 14.4       |
| 35-44                                                      | 396  | 19.3       |
| 45-54                                                      | 355  | 17.5       |
| 55-69                                                      | 519  | 24.2       |
| 70 or above                                                | 326  | 13.5       |
| <b>Sex</b>                                                 |      |            |
| Male                                                       | 987  | 48.0       |
| Female                                                     | 1094 | 50.7       |
| Prefer not to say                                          | 27   | 1.3        |
| <b>Ethnicity</b>                                           |      |            |
| White                                                      | 1985 | 93.9       |
| Asian/Asian British                                        | 48   | 2.4        |
| Black / African / Caribbean / Black British                | 20   | 1.0        |
| Other ethnic group, including mixed/multiple ethnic groups | 39   | 1.9        |
| Prefer not to say                                          | 16   | 0.77       |
| <b>Marital status</b>                                      |      |            |
| Married, civil partnership, or living as married           | 1283 | 60.3       |
| Separated, divorced, or widowed                            | 270  | 12.2       |
| Never married                                              | 545  | 27.1       |
| Prefer not to say                                          | 10   | 0.45       |
| <b>Area of residence</b>                                   |      |            |
| London                                                     | 239  | 13.1       |
| North                                                      | 522  | 23.3       |
| Midlands                                                   | 531  | 25.2       |
| South                                                      | 485  | 22.5       |
| N. Ireland, Scotland, Wales                                | 331  | 15.9       |
| <b>Education</b>                                           |      |            |
| No formal qualification                                    | 121  | 5.5        |
| Secondary-level qualification                              | 859  | 42.1       |
| Post-secondary-level, below bachelor                       | 148  | 6.9        |
| Bachelor-level or above                                    | 664  | 30.8       |
| Other technical, professional or higher qualification      | 245  | 11.2       |
| Don't Know                                                 | 32   | 1.6        |
| Prefer not to say                                          | 39   | 2.0        |
| <b>Employment status</b>                                   |      |            |
| Working full time                                          | 889  | 43.4       |
| Working part time                                          | 292  | 14.1       |
| Full time student                                          | 112  | 5.6        |
| Retired                                                    | 553  | 23.6       |
| Unemployed or not working                                  | 207  | 10.5       |

|                                                                               |      |      |
|-------------------------------------------------------------------------------|------|------|
| Other                                                                         | 55   | 2.8  |
| <b>Household income</b>                                                       |      |      |
| <£20,000                                                                      | 440  | 20.7 |
| £20,000 to £29,999                                                            | 355  | 16.8 |
| £30,000-£49,999                                                               | 472  | 22.4 |
| £50,000 and over                                                              | 429  | 20.6 |
| Don't know                                                                    | 103  | 5.1  |
| Prefer not to say                                                             | 309  | 14.4 |
| <b>Savings</b>                                                                |      |      |
| Less than £100                                                                | 278  | 13.6 |
| £100 to £999                                                                  | 242  | 11.8 |
| £1,000 to £4,999                                                              | 305  | 14.5 |
| £5,000 to £24,999                                                             | 359  | 16.6 |
| £25,000 or more                                                               | 359  | 16.6 |
| Prefer not to say                                                             | 565  | 26.9 |
| <b>Housing tenure</b>                                                         |      |      |
| Own – outright                                                                | 681  | 30.4 |
| Own – mortgage/shared ownership                                               | 639  | 30.8 |
| Rent – private landlord                                                       | 319  | 15.6 |
| Rent – local authority/housing association                                    | 219  | 10.7 |
| Live with parents, family or friends                                          | 215  | 10.7 |
| Other                                                                         | 35   | 1.8  |
| <b>COVID-19 risk perceptions</b>                                              |      |      |
| <b>Level of worry about the current COVID-19 outbreak in the UK</b>           |      |      |
| Worried                                                                       | 1640 | 77.4 |
| Not worried                                                                   | 454  | 21.9 |
| Don't know                                                                    | 14   | 0.74 |
| <b>Perceived susceptibility<sup>a</sup></b>                                   |      |      |
| Likely                                                                        | 979  | 47.5 |
| Neither likely or unlikely                                                    | 547  | 26.2 |
| Unlikely                                                                      | 337  | 15.9 |
| Don't know                                                                    | 220  | 10.5 |
| <b>Perceived severity<sup>b</sup></b>                                         |      |      |
| I would expect it to be life-threatening                                      | 103  | 4.7  |
| I would expect it to be severe (e.g. may need care and treatment in hospital) | 306  | 14.2 |
| I would expect it to be moderate (e.g. may need self-care and rest in bed)    | 1180 | 56.9 |
| I would expect it to be mild (e.g. can go about daily tasks normally)         | 351  | 17.2 |
| I would expect to have no symptoms                                            | 33   | 1.7  |
| Don't know                                                                    | 110  | 5.3  |

<sup>a</sup>Under the UK government's current preventive measures (at the time of the study), how likely or unlikely do you think it is you will be infected with the coronavirus (COVID-19) at any point in the future?

<sup>b</sup>Please imagine you were infected with coronavirus (i.e. COVID-19), which of the following do you think would best apply?

**Figure 1. Perceived effectiveness and actual adoption of preventative measures to prevent transmission of COVID-19; N=2,108**



Table 2. Social distancing behaviour and ability to work from home by a range of sociodemographic factors, N=2,108

|                                                  | Social distancing measures being taken yes vs no <sup>a</sup> |            |                            |                            | Able to work from home yes vs no (N=1,149) <sup>d</sup> |            |                          |                      |
|--------------------------------------------------|---------------------------------------------------------------|------------|----------------------------|----------------------------|---------------------------------------------------------|------------|--------------------------|----------------------|
|                                                  | N                                                             | Weighted % | Unadjusted RR (95% CI)     | Adjusted RR (95% CI)       | N                                                       | Weighted % | Unadjusted RR (95% CI)   | Adjusted RR (95% CI) |
| <b>Social distancing</b>                         |                                                               |            |                            |                            |                                                         |            |                          |                      |
| Yes                                              | 969                                                           | 45.2       |                            |                            |                                                         |            |                          |                      |
| No                                               | 1,139                                                         | 54.8       |                            |                            |                                                         |            |                          |                      |
| <b>Ability to work from home</b>                 |                                                               |            |                            |                            |                                                         |            |                          |                      |
| Yes                                              |                                                               |            |                            |                            | 540                                                     | 44.3       |                          |                      |
| No                                               |                                                               |            |                            |                            | 609                                                     | 53.0       |                          |                      |
| Don't Know                                       |                                                               |            |                            |                            | 32                                                      | 2.7        |                          |                      |
| <b>Age</b>                                       |                                                               |            |                            |                            |                                                         |            |                          |                      |
| 18-34                                            | 202                                                           | 38.4       | Ref                        | Ref <sup>b</sup>           | 154                                                     | 48.0       | Ref                      | Ref <sup>e</sup>     |
| 35-49                                            | 229                                                           | 40.8       | 1.1 (0.91-1.2)             | 0.86 (0.74-1.0)            | 220                                                     | 48.0       | 1.0 (0.86-1.2)           | 0.98 (0.94-1.3)      |
| 50-69                                            | 329                                                           | 46.4       | <b>1.2 (1.1-1.4)**</b>     | 0.81 (0.73-1.0)            | 151                                                     | 39.9       | <b>0.83 (0.70-0.99)*</b> | 0.90 (0.81-1.1)      |
| 70 or older                                      | 209                                                           | 64.2       | <b>1.7 (1.5-1.9)***</b>    | <b>1.2 (1.1-1.5)*</b>      | 15                                                      | 53.9       | 1.1 (0.78-1.6)           | 1.1 (0.96-1.7)       |
| <b>Sex</b>                                       |                                                               |            |                            |                            |                                                         |            |                          |                      |
| Male                                             | 436                                                           | 42.9       | Ref                        | Ref <sup>b</sup>           | 280                                                     | 46.1       | Ref                      | Ref <sup>e</sup>     |
| Female                                           | 519                                                           | 47.4       | <b>1.1 (1.0-1.2)*</b>      | 1.0 (0.88-1.2)             | 254                                                     | 44.8       | 0.97 (0.85-1.1)          | 0.98 (0.86-1.2)      |
| <b>Ethnicity</b>                                 |                                                               |            |                            |                            |                                                         |            |                          |                      |
| White                                            | 919                                                           | 45.5       | Ref                        | -                          | 506                                                     | 45.1       | Ref                      | Ref <sup>e</sup>     |
| Black, Asian and minority ethnic                 | 45                                                            | 42.1       | 0.92 (0.73-1.2)            |                            | 31                                                      | 54.2       | 1.2 (0.94-1.5)           | 1.0 (0.98-1.1)       |
| <b>Marital status</b>                            |                                                               |            |                            |                            |                                                         |            |                          |                      |
| Married, civil partnership, or living as married | 628                                                           | 48.4       | Ref                        | Ref <sup>b</sup>           | 366                                                     | 47.2       | Ref                      | -                    |
| Separated, divorced, or widowed                  | 121                                                           | 44.1       | 0.91 (0.79-1.1)            | <b>0.75 (0.64-0.87)***</b> | 43                                                      | 39.5       | 0.84 (0.65-1.1)          |                      |
| Never married                                    | 214                                                           | 38.4       | <b>0.79 (0.70-0.90)***</b> | <b>0.74 (0.63-0.88)**</b>  | 128                                                     | 43.5       | 0.92 (0.79-1.1)          |                      |
| <b>Area of residence</b>                         |                                                               |            |                            |                            |                                                         |            |                          |                      |
| London                                           | 111                                                           | 45.2       | Ref                        | -                          | 76                                                      | 54.0       | Ref                      | Ref <sup>e</sup>     |
| North of England                                 | 220                                                           | 41.6       | 0.92 (0.77-1.1)            |                            | 129                                                     | 44.7       | 0.83(0.67-1.0)           | 1.0 (0.76-1.2)       |
| Midlands and East of England                     | 249                                                           | 46.0       | 1.0 (0.86-1.2)             |                            | 123                                                     | 44.4       | 0.82 (0.67-1.0)          | 1.0 (0.75-1.1)       |
| South of England                                 | 221                                                           | 45.0       | 0.99 (0.84-1.2)            |                            | 151                                                     | 49.0       | 0.91 (0.75-1.1)          | 1.0 (0.88-1.4)       |

|                                                 |     |      |                            |                            |     |      |                            |                            |
|-------------------------------------------------|-----|------|----------------------------|----------------------------|-----|------|----------------------------|----------------------------|
| N. Ireland, Scotland, Wales                     | 168 | 49.9 | 1.1 (0.92-1.3)             |                            | 61  | 35.2 | <b>0.65 (0.50-0.84)**</b>  | 0.76 (0.59-1.0)            |
| <b>Education</b>                                |     |      |                            |                            |     |      |                            |                            |
| Degree or above                                 | 321 | 48.0 | Ref                        | -                          | 289 | 62.6 | Ref                        | Ref <sup>f</sup>           |
| Post-secondary                                  | 186 | 46.7 | 0.97 (0.85-1.1)            |                            | 105 | 47.7 | <b>0.76 (0.65-0.89)**</b>  | <b>0.68 (0.59-0.79)***</b> |
| Secondary or below                              | 436 | 43.7 | 0.91 (0.82-1.0)            |                            | 137 | 29.4 | <b>0.47 (0.40-0.55)***</b> | <b>0.45 (0.39-0.53)***</b> |
| <b>Employment status</b>                        |     |      |                            |                            |     |      |                            |                            |
| Working full time                               | 344 | 38.6 | Ref                        | Ref <sup>b</sup>           | 439 | 48.9 | Ref                        | Ref <sup>f</sup>           |
| Working part time                               | 136 | 46.8 | <b>1.2 (1.0-1.4)*</b>      | 1.0 (0.86-1.2)             | 101 | 35.0 | <b>0.71 (0.60-0.85)***</b> | 0.93 (0.84-1.2)            |
| Full time student                               | 43  | 36.3 | 0.94 (0.73-1.2)            | 1.0 (0.71-1.5)             | N/A | N/A  | N/A                        | N/A                        |
| Retired                                         | 331 | 59.7 | <b>1.5 (1.4-1.7)***</b>    | 1.1 (0.90-1.3)             | N/A | N/A  | N/A                        | N/A                        |
| Unemployed / Not working                        | 95  | 45.4 | 1.2 (0.99-1.4)             | 1.1 (0.90-1.4)             | N/A | N/A  | N/A                        | N/A                        |
| <b>Household income</b>                         |     |      |                            |                            |     |      |                            |                            |
| £50,000 and over                                | 178 | 41.0 | Ref                        | Ref <sup>c</sup>           | 241 | 67.3 | Ref                        | Ref <sup>g</sup>           |
| £30,000 to £49,999                              | 211 | 43.8 | 1.1 (0.92-1.2)             | 1.0 (0.87-1.2)             | 131 | 42.6 | <b>0.63 (0.54-0.74)***</b> | <b>0.55 (0.47-0.63)***</b> |
| £20,000 to £29,999                              | 173 | 48.5 | <b>1.2 (1.0-1.4)*</b>      | 1.1 (0.89-1.3)             | 64  | 30.7 | <b>0.46 (0.37-0.57)***</b> | <b>0.41 (0.33-0.52)***</b> |
| <£20,000                                        | 218 | 49.0 | <b>1.2 (1.0-1.4)*</b>      | 1.0 (0.87-1.2)             | 31  | 22.7 | <b>0.34 (0.24-0.47)***</b> | <b>0.33 (0.24-0.45)***</b> |
| <b>Savings</b>                                  |     |      |                            |                            |     |      |                            |                            |
| £25,000 or more                                 | 177 | 48.4 | Ref                        | Ref <sup>c</sup>           | 100 | 59.9 | Ref                        | Ref <sup>g</sup>           |
| £5,000 to £24,999                               | 177 | 48.7 | 1.0 (0.86-1.2)             | 1.1 (0.93-1.3)             | 131 | 57.6 | 0.96 (0.81-1.1)            | 0.90 (0.76-1.1)            |
| £1,000 to £4,999                                | 126 | 40.7 | 0.84 (0.71-1.0)            | <b>0.76 (0.67-0.87)***</b> | 89  | 43.7 | <b>0.73 (0.59-0.90)**</b>  | <b>0.67 (0.54-0.83)***</b> |
| £100 to £999                                    | 91  | 37.4 | <b>0.77 (0.63-0.94)*</b>   | <b>0.73 (0.61-0.87)***</b> | 67  | 40.1 | <b>0.67 (0.53-0.84)**</b>  | <b>0.64 (0.50-0.81)***</b> |
| Less than £100                                  | 122 | 43.5 | 0.90 (0.76-1.1)            | <b>0.83 (0.73-0.95)***</b> | 54  | 33.1 | <b>0.55 (0.43-0.71)***</b> | <b>0.51 (0.39-0.67)***</b> |
| <b>Housing tenure</b>                           |     |      |                            |                            |     |      |                            |                            |
| Own outright                                    | 377 | 55.0 | Ref                        | Ref <sup>c</sup>           | 93  | 41.0 | Ref                        | Ref <sup>g</sup>           |
| Own with mortgage/shared ownership              | 261 | 40.8 | <b>0.74 (0.66-0.83)***</b> | 0.95 (0.82-1.1)            | 293 | 55.0 | <b>1.3 (1.1- 1.6)**</b>    | 1.0 (0.73-1.5)             |
| Rented from private landlord                    | 145 | 45.0 | <b>0.82 (0.71-0.94)**</b>  | 1.1 (0.90-1.3)             | 85  | 39.8 | 0.97 (0.77-1.2)            | 0.92 (0.83-1.1)            |
| Rented from local authority/housing association | 94  | 42.2 | <b>0.77 (0.65-0.91)**</b>  | 0.90 (0.75-1.1)            | 16  | 18.2 | <b>0.44 (0.27-0.72)**</b>  | <b>0.45 (0.28-0.73)**</b>  |
| Live with parents, family, or friends           | 78  | 35.4 | <b>0.64 (0.53-0.78)***</b> | 0.93 (0.70-1.2)            | 46  | 43.6 | 1.1 (0.81-1.4)             | 0.79 (0.65-1.0)            |

<sup>a</sup>Those that report avoiding crowded areas AND social events; <sup>b</sup>Mutually adjusted for age, sex, marital status, employment status, household income, savings and housing tenure; <sup>c</sup>Adjusted for age, sex, marital status and employment status. <sup>d</sup>Excluding those who responded "Don't know"; <sup>e</sup>Mutually adjusted for age, sex, ethnicity, UK area of residence, education, employment status, household income, savings and housing tenure; <sup>f</sup>Adjusted for age, sex, ethnicity, UK area of residence and housing tenure; <sup>g</sup>Adjusted for age, sex, ethnicity and UK area of residence. \*p<.05, \*\*p<.01, \*\*\*p<.001

### Ability to work from home

Overall, 44.3% of respondents reported being able to work from home (i.e. permitted by their employer and have the necessary equipment to do their job from home).

Respondents who held post-secondary but below degree-level (47.7%; aRR:0.68; 95% CI:0.59,0.79) and secondary or below level (29.4%; aRR:0.45; 95% CI:0.39,0.53) education qualifications were less likely to be able to work from home compared with those educated to degree level (62.6%) (Table 2). As with educational level, there was a household income and savings gradient with ability to work from home. Those with the lowest household income (<£20,000) were three times less likely to be able to work from home compared to those with household incomes of £50,000 and above (22.7% vs. 67.3%; aRR:0.33; 95% CI:0.24,0.45). Respondents with £100 savings or less were half as likely to be able to work from home compared to those with £25,000 or more in savings (33.1% vs. 59.9%; aRR:0.51; 95% CI:0.39,0.67) (Table 2). Compared with those who owned their home outright, those renting accommodation from a local authority or housing association were less likely to be able to work from home (18.2% vs. 41.0%; aRR:0.45; 95% CI:0.28,0.73).

### Willingness and ability to self-isolate

Overall, perceived ability (87.0%) and willingness (87.6%) to self-isolate for 7 days if asked by a healthcare professional were high.

In terms of socio-demographic associations, there was no effect of sex on perceived ability to self-isolate (Table 3). However, women were somewhat more willing to do so than men (94.9% vs. 91.8%; aRR:1.1; 95% CI:1.0,1.2). Respondents from ethnic minority backgrounds perceived themselves to be less able to self-isolate than respondents from white backgrounds (84.8% vs. 92.1%, aRR:0.89; 95% CI:0.79 to 1.0), although they were equally willing to do so (Table 3).

Some indicators of socioeconomic status were significantly associated with perceived ability and willingness to self-isolate. Respondents who held post-secondary but below degree-level education qualifications were less willing to self-isolate (90.9% vs. 94.9% aRR:0.95; 95% CI:0.92,0.99) than respondents educated to degree level (Table 3). Those with household incomes below £20,000 were less likely to be able to self-isolate compared with those on

Table 3. Ability and willingness to self-isolate by sociodemographic factors

|                                                  | Able to self-isolate yes vs no (N=2,002) <sup>a</sup> |            |                          |                         | Willing to self-isolate yes vs no (N=1,978) <sup>a</sup> |            |                          |                       |
|--------------------------------------------------|-------------------------------------------------------|------------|--------------------------|-------------------------|----------------------------------------------------------|------------|--------------------------|-----------------------|
|                                                  | N                                                     | Weighted % | Unadjusted RR (95% CI)   | Adjusted RR (95% CI)    | N                                                        | Weighted % | Unadjusted RR (95% CI)   | Adjusted RR (95% CI)  |
| <b>Self-isolation ability/willingness</b>        |                                                       |            |                          |                         |                                                          |            |                          |                       |
| Yes, I would                                     | 1,834                                                 | 87.0       |                          |                         | 1,847                                                    | 87.6       |                          |                       |
| No, I wouldn't                                   | 168                                                   | 8.0        |                          |                         | 131                                                      | 6.2        |                          |                       |
| Don't know                                       | 106                                                   | 5.0        |                          |                         | 130                                                      | 6.2        |                          |                       |
| <b>Age</b>                                       |                                                       |            |                          |                         |                                                          |            |                          |                       |
| 18-34                                            | 466                                                   | 90.8       | Ref                      | Ref <sup>b</sup>        | 457                                                      | 91.6       | Ref                      | Ref <sup>d</sup>      |
| 35-49                                            | 494                                                   | 90.0       | 0.99 (0.95-1.1)          | 1.0 (0.96-1.1)          | 508                                                      | 94.2       | 1.0 (0.99-1.1)           | 1.0 (0.98-1.1)        |
| 50-69                                            | 614                                                   | 92.2       | 1.0 (0.98-1.1)           | 1.0 (0.97-1.1)          | 627                                                      | 93.6       | 1.0 (0.99-1.1)           | 1.0 (0.96-1.1)        |
| 70 or older                                      | 262                                                   | 94.9       | <b>1.1 (1.0-1.2)*</b>    | 1.0 (0.96-1.1)          | 255                                                      | 94.4       | 1.0 (0.99-1.1)           | 1.0 (0.96-1.1)        |
| <b>Sex</b>                                       |                                                       |            |                          |                         |                                                          |            |                          |                       |
| Male                                             | 878                                                   | 90.7       | Ref                      | Ref <sup>b</sup>        | 878                                                      | 91.8       | Ref                      | Ref <sup>d</sup>      |
| Female                                           | 957                                                   | 92.5       | 1.0 (0.99-1.1)           | 1.0 (0.98-1.1)          | 969                                                      | 94.9       | <b>1.1 (1.0-1.2)**</b>   | <b>1.1 (1.0-1.2)*</b> |
| <b>Ethnicity</b>                                 |                                                       |            |                          |                         |                                                          |            |                          |                       |
| White                                            | 1,737                                                 | 92.1       | Ref                      | Ref <sup>b</sup>        | 1,751                                                    | 93.7       | Ref                      | Ref <sup>d</sup>      |
| Black, Asian and minority ethnic                 | 89                                                    | 84.8       | <b>0.92 (0.84-0.99)*</b> | <b>0.89 (0.79-1.0)*</b> | 86                                                       | 87.8       | 0.94 (0.87-1.0)          | 0.96 (0.87-1.1)       |
| <b>Marital status</b>                            |                                                       |            |                          |                         |                                                          |            |                          |                       |
| Married, civil partnership, or living as married | 1,128                                                 | 92.3       | Ref                      | -                       | 1,143                                                    | 94.5       | Ref                      | Ref <sup>d</sup>      |
| Separated, divorced, or widowed                  | 215                                                   | 90.7       | 0.98 (0.94-1.2)          |                         | 219                                                      | 92.8       | 0.98 (0.95-1.1)          | 0.98 (0.93-1.1)       |
| Never married                                    | 482                                                   | 90.3       | 0.97 (0.95-1.1)          |                         | 477                                                      | 91.0       | <b>0.96 (0.93-0.99)*</b> | 0.99 (0.95-1.1)       |
| <b>Area of residence</b>                         |                                                       |            |                          |                         |                                                          |            |                          |                       |
| London                                           | 241                                                   | 91.6       | Ref                      | -                       | 243                                                      | 92.7       | Ref                      | -                     |
| North of England                                 | 427                                                   | 91.2       | 0.99 (0.95-1.1)          |                         | 430                                                      | 93.7       | 1.0 (0.97-1.1)           |                       |
| Midlands and East of England                     | 465                                                   | 93.0       | 1.0 (0.97-1.2)           |                         | 465                                                      | 93.9       | 1.0 (0.97-1.1)           |                       |
| South of England                                 | 408                                                   | 89.5       | 0.98 (0.93-1.1)          |                         | 411                                                      | 92.2       | 0.99 (0.95-1.0)          |                       |
| N. Ireland, Scotland, Wales                      | 294                                                   | 92.7       | 1.0 (0.96-1.2)           |                         | 297                                                      | 94.3       | 1.0 (0.97-1.1)           |                       |
| <b>Education</b>                                 |                                                       |            |                          |                         |                                                          |            |                          |                       |
| Degree or above                                  | 584                                                   | 93.1       | Ref                      | -                       | 591                                                      | 94.9       | Ref                      | Ref <sup>e</sup>      |

|                                                 |     |      |                            |                            |     |      |                          |                           |
|-------------------------------------------------|-----|------|----------------------------|----------------------------|-----|------|--------------------------|---------------------------|
| Post-secondary                                  | 332 | 90.2 | 0.97 (0.93-1.1)            |                            | 329 | 90.9 | <b>0.96 (0.92-0.99)*</b> | <b>0.95 (0.92-0.99)*</b>  |
| Secondary or below                              | 863 | 91.3 | 0.98 (0.95-1.1)            |                            | 873 | 93.6 | 0.98 (0.96-1.0)          | 1.0 (0.97-1.0)            |
| <b>Employment status</b>                        |     |      |                            |                            |     |      |                          |                           |
| Working full time                               | 799 | 91.4 | Ref                        | Ref <sup>b</sup>           | 804 | 93.6 | Ref                      | -                         |
| Working part time                               | 255 | 90.4 | 0.99 (0.95-1.0)            | 0.98 (0.93-1.0)            | 263 | 92.9 | 0.99 (0.96-1.0)          |                           |
| Full time student                               | 105 | 93.8 | 1.0 (0.97-1.1)             | 1.0 (0.94-1.1)             | 97  | 89.0 | 0.95 (0.88-1.0)          |                           |
| Retired                                         | 450 | 95.1 | <b>1.1 (1.0-1.2)**</b>     | 1.0 (0.96-1.1)             | 444 | 94.7 | 1.0 (0.98-1.1)           |                           |
| Unemployed or not working                       | 185 | 89.8 | 0.98 (0.93-1.0)            | 1.0 (0.93-1.1)             | 191 | 94.1 | 1.0 (0.96-1.1)           |                           |
| <b>Household income</b>                         |     |      |                            |                            |     |      |                          |                           |
| £50,000 and over                                | 405 | 95.5 | Ref                        | Ref <sup>c</sup>           | 393 | 94.7 | Ref                      | -                         |
| £30,000 to £49,999                              | 417 | 90.7 | <b>0.95 (0.92-0.98)**</b>  | <b>0.95 (0.92-0.98)**</b>  | 424 | 93.6 | 0.99 (0.95-1.2)          |                           |
| £20,000 to £29,999                              | 311 | 92.6 | 0.97 (0.94-1.1)            | 0.96 (0.93-1.0)            | 308 | 91.9 | 0.97 (0.93-1.1)          |                           |
| <£20,000                                        | 363 | 88.3 | <b>0.93 (0.89-0.96)***</b> | <b>0.92 (0.88-0.96)***</b> | 383 | 93.0 | 0.98 (0.95-1.1)          |                           |
| <b>Savings</b>                                  |     |      |                            |                            |     |      |                          |                           |
| £25,000 or more                                 | 329 | 95.6 | Ref                        | Ref <sup>c</sup>           | 318 | 94.1 | Ref                      | Ref <sup>f</sup>          |
| £5,000 to £24,999                               | 319 | 95.2 | 1.0 (0.96-1.1)             | 1.0 (0.97-1.1)             | 317 | 95.8 | 1.0 (0.98-1.1)           | 1.0 (0.98-1.1)            |
| £1,000 to £4,999                                | 274 | 92.3 | 0.96 (0.93-1.1)            | 0.99 (0.95-1.0)            | 272 | 92.8 | 0.98 (0.94-1.1)          | 0.99 (0.96-1.0)           |
| £100 to £999                                    | 217 | 90.0 | <b>0.94 (0.90-0.98)*</b>   | 0.97 (0.92-1.1)            | 221 | 94.8 | 1.0 (0.97-1.1)           | 1.0 (0.96-1.1)            |
| Less than £100                                  | 232 | 84.4 | <b>0.88 (0.83-0.93)***</b> | <b>0.90 (0.85-0.96)**</b>  | 250 | 90.9 | 0.96 (0.92-1.0)          | 0.96 (0.91-1.1)           |
| <b>Housing tenure</b>                           |     |      |                            |                            |     |      |                          |                           |
| Own outright                                    | 576 | 92.1 | Ref                        | Ref <sup>c</sup>           | 575 | 95.0 | Ref                      | Ref <sup>g</sup>          |
| Own with mortgage/shared ownership              | 571 | 89.1 | 0.98 (0.95-1.0)            | 1.0 (0.96-1.1)             | 584 | 95.0 | 1.0 (0.97-1.0)           | 1.0 (0.97-1.1)            |
| Rented from private landlord                    | 277 |      | <b>0.95 (0.91-0.99)*</b>   | 0.97 (0.92-1.0)            | 297 | 94.3 | 0.99 (0.96-1.0)          | 1.0 (0.95-1.1)            |
| Rented from local authority/housing association | 188 | 87.9 |                            |                            | 188 | 90.0 | <b>0.94 (0.90-0.99)*</b> | <b>0.94 (0.89-0.99)**</b> |
| Live with parents, family, or friends           | 197 | 92.9 | <b>0.94 (0.89-0.99)*</b>   | 0.97 (0.91-1.0)            | 178 | 88.1 | <b>0.92 (0.88-0.98)*</b> | 0.95 (0.89-1.0)           |

<sup>a</sup>Excluding those who responded "Don't know"; <sup>b</sup>Mutually adjusted for age, gender, ethnicity, employment status, household income, savings, and housing tenure; <sup>c</sup>Adjusted for age, gender, ethnicity, and employment status; <sup>d</sup>Mutually adjusted for age, gender, ethnicity, marital status, education, savings, and housing tenure; <sup>e</sup>Adjusted for age, gender, ethnicity, marital status, and housing tenure; <sup>f</sup>Adjusted for age, gender, ethnicity, and marital status; <sup>g</sup>Adjusted for age, gender, ethnicity, marital status, and education; \*p<.05, \*\*p<.01, \*\*\*p<.001

1  
2  
3 household incomes of £50,000 and above (88.3% vs. 95.5%; aRR:0.92; 95% CI:0.88,0.96).  
4 Similarly, respondents with less than £100 in savings were less likely to be able to self-isolate  
5 compared with those with savings of £25,000 or more (84.8% vs. 95.6%; aRR:0.90; 95%  
6 CI:0.85,0.96). There was no effect on willingness to self-isolate by household income or  
7 amount of savings (Table 3).  
8  
9  
10  
11  
12

13 Those in accommodation rented from a private landlord, local authority, or housing  
14 association were less likely to report being able to self-isolate, although this association was  
15 no longer significant when other sociodemographic factors were adjusted for. In terms of  
16 willingness to self-isolate, respondents renting accommodation from a local authority or  
17 housing association were less likely to be willing to self-isolate compared with those who  
18 owned their home outright (aRR:0.94; 95% CI:0.89,0.99) (Table 3).  
19  
20  
21  
22  
23  
24

## 25 Discussion

26 This study reports on the perceptions and behaviour of the UK adult population in the two  
27 days following the UK Government's introduction of recommendations on social distancing  
28 on March 16 2020 [6]. We found high levels of self-reported behaviour change. Notably, the  
29 most-adopted measures, washing hands more frequently with soap and water, using hand  
30 sanitiser, and covering nose and mouth when sneezing or coughing, prominently featured in  
31 national public health campaigns from relatively early on in the epidemic [4], and mirrors  
32 results seen in previous pandemics [29]. However, there were marked differences between  
33 the perceived effectiveness and adoption of NPIs. This suggests that lack of knowledge on  
34 what measures are effective against COVID-19 is not a key driver of compliance in the UK  
35 population. In contrast, a similar study conducted in Hong Kong showed comparatively high  
36 perceived effectiveness and adoption of preventive measures [24].  
37  
38  
39  
40  
41  
42  
43  
44  
45  
46

47 Our results highlighted significant differences across demographic and socioeconomic strata  
48 for social distancing behaviour, ability to work from home, and the ability and willingness of  
49 people to self-isolate. There was a strong association between socioeconomic deprivation  
50 and ability to adopt NPIs. Although willingness to self-isolate was high overall, those from  
51 more disadvantaged backgrounds were less likely to be able to work from home or self-  
52 isolate if needed, suggesting the existence of structural barriers to adopting preventive  
53 behaviours in these groups.  
54  
55  
56  
57  
58  
59  
60

1  
2  
3 The strength of this study is in the representative sample of the UK adult population, the  
4 ability to achieve our sample size quickly, and the timeliness in relation to changing  
5 government recommendations. However, social distancing measures were only brought in  
6 two days before the survey. Therefore, there may have not been enough time for people to  
7 fully implement these measures prior to their participation in the study. But many  
8 employers had already begun allowing staff to work from home in the week prior to the UK  
9 Government's announcement, and ability and willingness to self-isolate do not measure  
10 behaviour change directly but intent. So, we believe our study does indeed measure  
11 attitudes and behaviours based on the most recent advice at the time of the survey. Social  
12 desirability bias is also possible given that participants were asked whether they were  
13 complying with government restrictions. However, this is less of an issue with online surveys  
14 where respondents are assured anonymity and answer questions in the privacy of their own  
15 home without any live human interaction. In addition, our sampling approach is prone to  
16 selection bias, for example by excluding participants without internet access and non-English  
17 speakers, and sampling from a panel of individuals who have specifically opted in to  
18 participate in online research activities. As in almost all population surveys, our study had  
19 unequal participation, with lower response among people from minority ethnic groups and  
20 older age groups. We re-weighted the sample to account for such differential response,  
21 although this may not have overcome unknown participation biases. Furthermore, surveys  
22 collecting self-report data are generally subject to limitations including honesty,  
23 introspective ability, and interpretation of the questions. The survey tool consisted of  
24 predominantly closed-ended questions. Thus, we were unable to explore responses in more  
25 depth.  
26  
27  
28  
29  
30  
31  
32  
33  
34  
35  
36  
37  
38  
39  
40  
41  
42

43 Our findings highlight the stark choices faced by those in lower socioeconomic groups and  
44 suggest that unless the government intervenes to support these individuals, the impact of  
45 this epidemic will likely be felt unequally in our society. Not only this, but if a large  
46 proportion of the population continues to work while unwell, low compliance will render the  
47 various forms of social distancing less effective, as low-income workers are forced to choose  
48 between financial and physical health. Indeed, this behaviour has already been observed in  
49 the workplace in previous pandemics: workers without access to paid sick leave were more  
50 likely to work while unwell than those with paid sick leave [30]. A study in China after the  
51 H7N9 epidemic found that only 7% of people reported willingness to self-quarantine [31].  
52  
53  
54  
55  
56  
57  
58  
59  
60

1  
2  
3 Also, during the Middle East Respiratory Syndrome (MERS) outbreak in South Korea in 2015,  
4 there was heterogeneous uptake of preventive interventions [32].  
5  
6  
7

8 In the absence of a vaccine and treatments over the short-term, high compliance with social  
9 distancing, self-isolation and household quarantine is paramount to reduce transmission and  
10 the impact of COVID-19. NPI compliance, risk perception and behaviour are not consistent  
11 across cultures, social status or time. Indeed, previous studies have shown that perceptions  
12 and behaviours often change over time [29]. Therefore, current modelling projections of the  
13 impact of NPIs on morbidity and mortality are always provisional [7]. Future COVID-19  
14 models should explore the variation captured in this and previous studies to better estimate  
15 the impact of differential uptake of NPIs in the UK and beyond. It is also important to  
16 monitor behaviour throughout the epidemic to know when to implement further public  
17 health messaging, and when further or alternative government actions might be required, to  
18 mitigate falling compliance.  
19  
20  
21  
22  
23  
24  
25  
26  
27

### 28 **Conclusions and policy implications**

29 Our findings highlight that those most economically disadvantaged in society are less able to  
30 comply with certain NPIs, likely in part due to their financial situation. Whilst one approach  
31 may be to better tailor public health messaging to this subpopulation, this must be done  
32 alongside considered fiscal and monetary policy to mitigate the financial costs of following  
33 government public health advice. Therefore, it is imperative that the UK Government, and  
34 governments around the world, quickly develop and implement policies to support the most  
35 vulnerable, in a bid to minimise the long-term social and economic harm caused by COVID-  
36 19. Government policy should recognise the disparity in impact across socioeconomic  
37 groups, particularly across the labour market, and should aim to support workers equitably  
38 across the income spectrum. This would likely help increase compliance across the  
39 population to the levels required to suppress transmission and thereby reduce the strain on  
40 national health services, both in the UK and abroad. Although the UK Government has since  
41 announced a range of measures to support public services, individuals, and businesses, in  
42 part to facilitate compliance with current lockdown measures [33], it is uncertain how long  
43 these protections will be in place for and whether they will continue once lockdown  
44 restrictions are lifted.  
45  
46  
47  
48  
49  
50  
51  
52  
53  
54  
55  
56  
57

### 58 **Acknowledgments**

59  
60



1  
2  
3 The survey was conducted by YouGov on behalf of the Patient Experience Research Centre,  
4 School of Public Health, Imperial College London. Questions were developed by the authors,  
5 and YouGov provided suggestions to improve clarity and understandability.  
6  
7  
8  
9

10 We thank Prof. Kin On Kwok, Ms. Wan In Wei, Prof. Samuel Yeung Shan Wong and the  
11 research team in the Division of Infectious Diseases of JC School of Public Health and Primary  
12 Care, The Chinese University of Hong Kong, Hong Kong Special Administrative Region, China  
13 for permission to use their survey instrument and translating it into English.  
14  
15  
16  
17

### 18 **Contributors**

19 CJA, LB, RR, PP and HW designed the study. CJA, JWE and CV analysed the data and  
20 performed the statistical analyses. CJA, LB, RR, CV and HW drafted the initial manuscript. All  
21 authors reviewed the drafted manuscript for critical content and approved the final version.  
22 The corresponding author attests that all listed authors meet authorship criteria and that no  
23 others meeting the criteria have been omitted. CJA and HW are the guarantors.  
24  
25  
26  
27  
28  
29

### 30 **Declaration of interests**

31 The authors declare that they have no know competing financial interests or personal  
32 relationships that could have appeared to influence the work reported in this paper.  
33  
34  
35  
36

### 37 **Funding**

38 The study was supported by Imperial NIHR Research Capability Funding (Award No. P81291).  
39 Professor Helen Ward is a National Institute for Health Research (NIHR) Senior Investigator  
40 (Award No. P75372). The views expressed in this article are those of the authors and not  
41 necessarily those of the NHS, the NIHR, or the Department of Health.  
42  
43  
44  
45  
46

### 47 **Data sharing**

48 The survey instrument is freely available to download from the School of Public Health,  
49 Imperial College London COVID-19 resources webpage: [https://www.imperial.ac.uk/mrc-  
50 global-infectious-disease-analysis/news--wuhan-coronavirus/covid-19-resources/  
51](https://www.imperial.ac.uk/mrc-global-infectious-disease-analysis/news--wuhan-coronavirus/covid-19-resources/)  
52  
53  
54

55 The data used for the analyses are available from the corresponding author on request.  
56  
57

### 58 **References**

59  
60

- 1  
2  
3 1. World Health Organisation. Rolling updates on coronavirus disease (COVID-19)  
4 2020 [Available from: [https://www.who.int/emergencies/diseases/novel-coronavirus-](https://www.who.int/emergencies/diseases/novel-coronavirus-2019/events-as-they-happen)  
5 [2019/events-as-they-happen](https://www.who.int/emergencies/diseases/novel-coronavirus-2019/events-as-they-happen).  
6  
7
- 8 2. ECDC. Coronavirus disease 2019 (COVID-19) pandemic: increased transmission in the  
9 EU/EEA and the UK – seventh update Stockholm; 2020 25 March 2020
- 10 3. Public Health England. Weekly Coronavirus Disease 2019 (COVID-19) Surveillance  
11 Report: Summary of COVID-19 surveillance systems 2020 [Available from:  
12 [https://assets.publishing.service.gov.uk/government/uploads/system/uploads/attachment\\_](https://assets.publishing.service.gov.uk/government/uploads/system/uploads/attachment_data/file/888254/COVID19_Epidemiological_Summary_w22_Final.pdf)  
13 [data/file/888254/COVID19\\_Epidemiological\\_Summary\\_w22\\_Final.pdf](https://assets.publishing.service.gov.uk/government/uploads/system/uploads/attachment_data/file/888254/COVID19_Epidemiological_Summary_w22_Final.pdf).  
14  
15
- 16 4. Russell P. New Coronavirus: UK Public Health Campaign Launched. Medscape. 2020.  
17
- 18 5. Department of Health and Social Care. Coronavirus (COVID-19) action plan 2020  
19 [Available from: <https://www.gov.uk/government/publications/coronavirus-action-plan>.  
20  
21
- 22 6. UK Government. PM statement on coronavirus: 16 March 2020 2020 [Available  
23 from: [https://www.gov.uk/government/speeches/pm-statement-on-coronavirus-16-march-](https://www.gov.uk/government/speeches/pm-statement-on-coronavirus-16-march-2020)  
24 [2020](https://www.gov.uk/government/speeches/pm-statement-on-coronavirus-16-march-2020).  
25  
26
- 27 7. Ferguson NM, Laydon D, Nedjati-Gilani G, et al. Impact of non-pharmaceutical  
28 interventions (NPIs) to reduce COVID19 mortality and healthcare demand. 2020.  
29
- 30 8. Cowling BJ, Ng DMW, Ip DKM, et al. Community psychological and behavioral  
31 responses through the first wave of the 2009 influenza A(H1N1) pandemic in Hong Kong. The  
32 Journal of Infectious Diseases. 2010;202(6):867-76.  
33
- 34 9. Agüero F, Adell MN, Pérez Giménez A, López Medina MJ, Garcia Continente X.  
35 Adoption of preventive measures during and after the 2009 influenza A (H1N1) virus  
36 pandemic peak in Spain. Prev Med. 2011;53(3):203-6.  
37
- 38 10. Rubin GJ, Amlôt R, Page L, Wessely S. Public perceptions, anxiety, and behaviour  
39 change in relation to the swine flu outbreak: cross sectional telephone survey. BMJ.  
40 2009;339:b2651.  
41
- 42 11. Rubin GJ, Potts HW, Michie S. The impact of communications about swine flu  
43 (influenza A H1N1v) on public responses to the outbreak: results from 36 national telephone  
44 surveys in the UK. Health technology assessment (Winchester, England). 2010;14(34):183-  
45 266.  
46
- 47 12. Lau JTF, Griffiths S, Choi KC, Tsui HY. Avoidance behaviors and negative psychological  
48 responses in the general population in the initial stage of the H1N1 pandemic in Hong Kong.  
49 BMC Infectious Diseases. 2010;10(1):139.  
50  
51  
52  
53  
54  
55  
56  
57  
58  
59  
60

- 1  
2  
3 13. Eastwood K, Durrheim D, Francis JL, et al. Knowledge about pandemic influenza and  
4 compliance with containment measures among Australians. *Bull World Health Organ.*  
5 2009;87(8):588-94.  
6  
7  
8 14. Lohiniva AL, Sane J, Sibenberg K, Puumalainen T, Salminen M. Understanding  
9 coronavirus disease (COVID-19) risk perceptions among the public to enhance risk  
10 communication efforts: a practical approach for outbreaks, Finland, February 2020. *Euro*  
11 *Surveill.* 2020;25(13).(doi):10.2807/1560-7917.ES.2020.25.13.2000317.  
12  
13 15. Gesser-Edelsburg A, Cohen R, Hijazi R, Abed Elhadi Shahbari N. Analysis of Public  
14 Perception of the Israeli Government's Early Emergency Instructions Regarding COVID-19:  
15 Online Survey Study. *J Med Internet Res.* 2020;22(5):e19370. doi: 10.2196/.  
16  
17 16. Olapegba PO, Ayandele O. Survey data of COVID-19-related Knowledge, Risk  
18 Perceptions and Precautionary Behavior among Nigerians. *Data Brief.*  
19 2020;8(105685):105685.  
20  
21 17. Motta Zanin G, Gentile E, Parisi A, Spasiano D. A Preliminary Evaluation of the Public  
22 Risk Perception Related to the COVID-19 Health Emergency in Italy. *Int J Environ Res Public*  
23 *Health.* 2020;17(9).(pii):ijerph17093024. doi: 10.3390/ijerph.  
24  
25 18. Kin On K, Kin Kit L, Henry Ho Hin C, et al. Community Responses during Early Phase  
26 of COVID-19 Epidemic, Hong Kong. *Emerging Infectious Disease journal.* 2020;26(7).  
27  
28 19. McFadden SM, Malik AA, Aguolu OG, Willebrand KS, Omer SB. Perceptions of the  
29 adult US population regarding the novel coronavirus outbreak. *PLoS One.*  
30 2020;15(4):e0231808. doi: 10.1371/journal.pone.. eCollection 2020.  
31  
32 20. Husnayain A, Shim E, Fuad A, Su EC-Y. Understanding the Community Risk  
33 Perceptions of the COVID-19 Outbreak in South Korea: Infodemiology Study. *J Med Internet*  
34 *Res.* 2020;22(9):e19788.  
35  
36 21. Atchison CJ, Bowman L, Eaton JW, et al. Report 10: Public Response to UK  
37 Government Recommendations on COVID-19: Population Survey, 17-18 March 2020 2020.  
38  
39 22. YouGov. ESOMAR28: 28 questions to help online research buyers 14 March 2020.  
40 Available from:  
41 [http://doc.ukdataservice.ac.uk/doc/7647/mrdoc/pdf/7647\\_methodology\\_esomar\\_28.pdf](http://doc.ukdataservice.ac.uk/doc/7647/mrdoc/pdf/7647_methodology_esomar_28.pdf).  
42  
43 23. Office for National Statistics. UK 2011 census data [Available from:  
44 <https://www.ons.gov.uk/census/2011census>.  
45  
46 24. Kwok KO, Li KK, Chan HHH, et al. Community responses during the early phase of the  
47 COVID-19 epidemic in Hong Kong: risk perception, information exposure and preventive  
48 measures. *medRxiv.* 2020.  
49  
50  
51  
52  
53  
54  
55  
56  
57  
58  
59  
60

- 1  
2  
3 25. Fenton K, Pawson E, de Souza-Thomas L. Beyond the Data: Understanding the  
4 Impact of COVID-19 on BAME Communities. PHE. Online report. 2020 [Available from:  
5 [https://assets.publishing.service.gov.uk/government/uploads/system/uploads/attachment](https://assets.publishing.service.gov.uk/government/uploads/system/uploads/attachment_data/file/892376/COVID_stakeholder_engagement_synthesis_beyond_the_data.pdf)  
6 [data/file/892376/COVID\\_stakeholder\\_engagement\\_synthesis\\_beyond\\_the\\_data.pdf](https://assets.publishing.service.gov.uk/government/uploads/system/uploads/attachment_data/file/892376/COVID_stakeholder_engagement_synthesis_beyond_the_data.pdf).  
7  
8  
9
- 10 26. Ranganathan P, Pramesh CS, Aggarwal R. Common pitfalls in statistical analysis:  
11 Logistic regression. *Perspect Clin Res*. 2017;8(3):148-51.  
12
- 13 27. Rothman KJ. No adjustments are needed for multiple comparisons. *Epidemiology*  
14 (Cambridge, Mass). 1990;1(1):43-6.  
15
- 16 28. Feise RJ. Do multiple outcome measures require p-value adjustment? *BMC Medical*  
17 *Research Methodology*. 2002;2(1):8.  
18
- 19 29. Bults M, Beaujean DJ, Richardus JH, Voeten HA. Perceptions and behavioral  
20 responses of the general public during the 2009 influenza A (H1N1) pandemic: a systematic  
21 review. *Disaster Med Public Health Prep*. 2015;9(2):207-19. doi: 10.1017/dmp.2014.160.  
22  
23
- 24 30. Ahmed F, Zviedrite N, Uzicanin A. Effectiveness of workplace social distancing  
25 measures in reducing influenza transmission: a systematic review. *BMC Public Health*.  
26  
27  
28 2018;18(1):518. doi: 10.1186/s12889-018-5446-1.  
29
- 30 31. Goodwin R, Sun S. Public perceptions and reactions to H7N9 in Mainland China. *J*  
31 *Infect*. 2013;67(5):458-62. doi: 10.1016/j.jinf.2013.06.014. Epub Jul 5.  
32
- 33 32. Jang WM, Cho S, Jang DH, et al. Preventive Behavioral Responses to the 2015 Middle  
34 East Respiratory Syndrome Coronavirus Outbreak in Korea. *Int J Environ Res Public Health*.  
35 2019;16(12).(pii):ijerph16122161. doi: 10.3390/ijerph.  
36  
37
- 38 33. UK Government. Support for those affected by Covid-19 2020 [Available from:  
39 <https://www.gov.uk/government/publications/support-for-those-affected-by-covid-19>.  
40  
41  
42  
43  
44  
45  
46  
47  
48  
49  
50  
51  
52  
53  
54  
55  
56  
57  
58  
59  
60

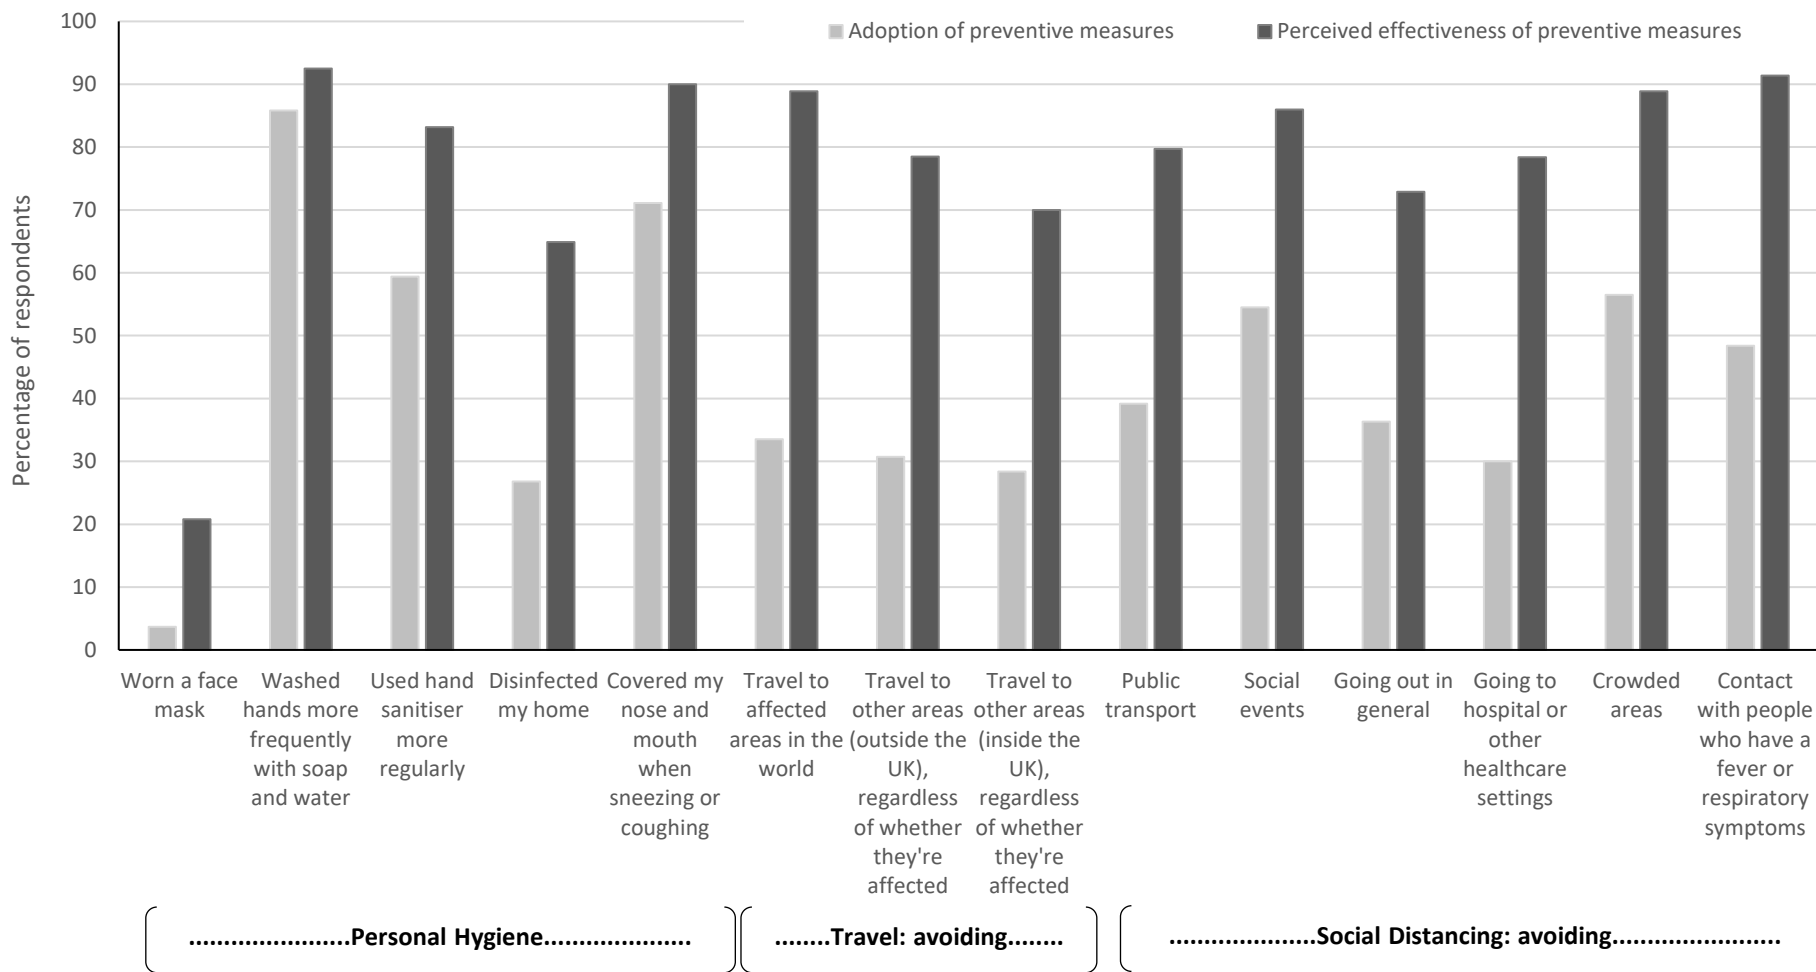

## Sample – Weighting Strategy

The weighting approach used rim weighting to adjust to population estimates of: age by sex; UK geographical region counts; ethnic group.

The age by sex and region counts were extracted from the ONS mid-year population estimates (1), and the ethnic group counts from the Labour Force Survey (Annual Population Survey) (2). To allow for the different sources of population estimates, the rim weighting was carried out on the proportions rather than population totals.

Age was grouped into seven categories: 18 to 24; 25 to 34; 35 to 44; 45 to 54; 55 to 64; 65 to 74; 75 or older. So the age and sex groups had 14 categories.

The reported ethnicity was grouped into nine categories: white; mixed / multiple ethnic groups; Indian; Pakistani; Bangladeshi; Chinese; any other Asian background; black African / Caribbean / other; and any other ethnic group or missing.

The rim weighting was carried out in two stages. At the first stage, the sample was weighted to region counts and age by sex groups only. This put the sample back into the correct proportion for UK geographical regions which corrects for the differential non-response. In the same stage, the age and sex groups were also adjusted to make sure that the final weighted profile was as close to the population as possible.

The second stage of rim weighting adjusted to all four measures, using the first stage weights as the starting weights. The adjustment factor between the first and second stage weights were trimmed at the 1<sup>st</sup> and 99<sup>th</sup> percentiles to dampen the extreme weights which improves efficiency. The final weights were calculated as the first stage weights multiplied by the trimmed adjustment factor for the second stage.

## Sample profile

|                    | Population of United Kingdom Profile | COMPLETED SURVEY - UNWEIGHTED (%) | COMPLETED SURVEY - WEIGHTED (%) |
|--------------------|--------------------------------------|-----------------------------------|---------------------------------|
| <b>GENDER</b>      |                                      |                                   |                                 |
| Male               | 48.9%                                | 47.4%                             | 48.6%                           |
| Female             | 51.1%                                | 52.6%                             | 51.4%                           |
|                    |                                      |                                   |                                 |
| <b>AGE</b>         |                                      |                                   |                                 |
| 18 to 24           | 10.9%                                | 10.3%                             | 11.1%                           |
| 25 to 34           | 17.3%                                | 14.0%                             | 14.4%                           |
| 35 to 44           | 16.1%                                | 18.8%                             | 19.3%                           |
| 45 to 54           | 17.5%                                | 16.8%                             | 17.5%                           |
| 55 to 64           | 15.0%                                | 13.7%                             | 14.6%                           |
| 65 to 74           | 12.6%                                | 20.5%                             | 17.9%                           |
| 75+                | 10.5%                                | 6.0%                              | 5.2%                            |
|                    |                                      |                                   |                                 |
| <b>REGION</b>      |                                      |                                   |                                 |
| North East         | 4.0%                                 | 4.7%                              | 4.4%                            |
| North West         | 11.0%                                | 11.7%                             | 10.9%                           |
| Yorkshire & Humber | 8.2%                                 | 8.4%                              | 8.0%                            |
| East Midlands      | 7.2%                                 | 7.5%                              | 7.7%                            |
| West Midlands      | 8.9%                                 | 8.3%                              | 8.4%                            |
| East of England    | 9.3%                                 | 9.4%                              | 9.1%                            |
| London             | 13.4%                                | 11.3%                             | 13.1%                           |
| South East         | 13.7%                                | 13.1                              | 13.0%                           |
| South West         | 8.4%                                 | 9.9%                              | 9.6%                            |

|                                       |       |       |       |
|---------------------------------------|-------|-------|-------|
| N. Ireland, Scotland, Wales           | 15.7% | 15.7% | 15.9% |
|                                       |       |       |       |
| <b>ETHNICITY</b>                      |       |       |       |
| White                                 | 86.3% | 94.2% | 93.9% |
| Mixed/Multiple ethnic groups          | 1.1%  | 1.6%  | 1.7%  |
| Indian                                | 2.9%  | 1.0%  | 1.1%  |
| Pakistani                             | 1.9%  | 0.52% | 0.54% |
| Bangladeshi                           | 0.8%  | 0.14% | 0.15% |
| Chinese                               | 0.5%  | 0.43% | 0.46% |
| Any other Asian background            | 1.2%  | 0.14% | 0.16% |
| Black/African/Caribbean/Black British | 3.3%  | 0.95% | 1.0%  |
| Other ethnic group / DK               | 1.9%  | 1.0%  | 1.0%  |

**REFERENCES**

- Office for National Statistics. Population estimates for the UK, England and Wales, Scotland and Northern Ireland: mid-2019 2020 [Available from: [www.ons.gov.uk/releases/populationestimatesfortheukenglandandwalescotlandandnorthernirelandmid2019](http://www.ons.gov.uk/releases/populationestimatesfortheukenglandandwalescotlandandnorthernirelandmid2019)].
- Office for National Statistics. Annual Population Survey/Labour Force Survey 2020 [Available from: <https://www.nomisweb.co.uk/sources/aps>].



STROBE Statement—Checklist of items that should be included in reports of *cross-sectional studies*

|                              | Item No | Recommendation                                                                                                                                                                                                                                                                                                                                                                                                   |
|------------------------------|---------|------------------------------------------------------------------------------------------------------------------------------------------------------------------------------------------------------------------------------------------------------------------------------------------------------------------------------------------------------------------------------------------------------------------|
| <b>Title and abstract</b>    | 1       | (a) Indicate the study's design with a commonly used term in the title or the abstract<br><b>PAGE 1 and 2</b><br>(b) Provide in the abstract an informative and balanced summary of what was done and what was found <b>PAGE 2</b>                                                                                                                                                                               |
| <b>Introduction</b>          |         |                                                                                                                                                                                                                                                                                                                                                                                                                  |
| Background/rationale         | 2       | Explain the scientific background and rationale for the investigation being reported<br><b>PAGE 4</b>                                                                                                                                                                                                                                                                                                            |
| Objectives                   | 3       | State specific objectives, including any prespecified hypotheses <b>PAGE 4</b>                                                                                                                                                                                                                                                                                                                                   |
| <b>Methods</b>               |         |                                                                                                                                                                                                                                                                                                                                                                                                                  |
| Study design                 | 4       | Present key elements of study design early in the paper <b>PAGE 5-6</b>                                                                                                                                                                                                                                                                                                                                          |
| Setting                      | 5       | Describe the setting, locations, and relevant dates, including periods of recruitment, exposure, follow-up, and data collection <b>PAGE 5-6</b>                                                                                                                                                                                                                                                                  |
| Participants                 | 6       | (a) Give the eligibility criteria, and the sources and methods of selection of participants <b>PAGE 5-6</b>                                                                                                                                                                                                                                                                                                      |
| Variables                    | 7       | Clearly define all outcomes, exposures, predictors, potential confounders, and effect modifiers. Give diagnostic criteria, if applicable <b>PAGE 5-7</b>                                                                                                                                                                                                                                                         |
| Data sources/<br>measurement | 8*      | For each variable of interest, give sources of data and details of methods of assessment (measurement). Describe comparability of assessment methods if there is more than one group <b>PAGE 5-6</b>                                                                                                                                                                                                             |
| Bias                         | 9       | Describe any efforts to address potential sources of bias <b>PAGE 5 and 7</b>                                                                                                                                                                                                                                                                                                                                    |
| Study size                   | 10      | Explain how the study size was arrived at <b>PAGE 5</b>                                                                                                                                                                                                                                                                                                                                                          |
| Quantitative variables       | 11      | Explain how quantitative variables were handled in the analyses. If applicable, describe which groupings were chosen and why <b>PAGE 7</b>                                                                                                                                                                                                                                                                       |
| Statistical methods          | 12      | (a) Describe all statistical methods, including those used to control for confounding<br><b>PAGE 7</b><br>(b) Describe any methods used to examine subgroups and interactions <b>PAGE 7</b><br>(c) Explain how missing data were addressed <b>N/A</b><br>(d) If applicable, describe analytical methods taking account of sampling strategy<br><b>PAGE 7</b><br>(e) Describe any sensitivity analyses <b>N/A</b> |
| <b>Results</b>               |         |                                                                                                                                                                                                                                                                                                                                                                                                                  |
| Participants                 | 13*     | (a) Report numbers of individuals at each stage of study—eg numbers potentially eligible, examined for eligibility, confirmed eligible, included in the study, completing follow-up, and analysed <b>PAGE 8</b><br>(b) Give reasons for non-participation at each stage <b>N/A</b><br>(c) Consider use of a flow diagram <b>N/A</b>                                                                              |
| Descriptive data             | 14*     | (a) Give characteristics of study participants (eg demographic, clinical, social) and information on exposures and potential confounders <b>PAGE 8-15</b><br>(b) Indicate number of participants with missing data for each variable of interest<br><b>Tables 1-3</b>                                                                                                                                            |
| Outcome data                 | 15*     | Report numbers of outcome events or summary measures <b>PAGE 8-15</b>                                                                                                                                                                                                                                                                                                                                            |
| Main results                 | 16      | (a) Give unadjusted estimates and, if applicable, confounder-adjusted estimates and their precision (eg, 95% confidence interval). Make clear which confounders were adjusted for and why they were included <b>PAGE 11-15; Tables 2-3</b>                                                                                                                                                                       |

1  
2  
3  
4  
5  
6  
7  
8  
9  
10  
11  
12  
13  
14  
15  
16  
17  
18  
19  
20  
21  
22  
23  
24  
25  
26  
27  
28  
29  
30  
31  
32  
33  
34  
35  
36  
37  
38  
39  
40  
41  
42  
43  
44  
45  
46  
47  
48  
49  
50  
51  
52  
53  
54  
55  
56  
57  
58  
59  
60

(b) Report category boundaries when continuous variables were categorized **PAGE 8-15; Tables 1-3**

(c) If relevant, consider translating estimates of relative risk into absolute risk for a meaningful time period **N/A**

|                          |    |                                                                                                                                                                                              |
|--------------------------|----|----------------------------------------------------------------------------------------------------------------------------------------------------------------------------------------------|
| Other analyses           | 17 | Report other analyses done—eg analyses of subgroups and interactions, and sensitivity analyses <b>PAGE 10-15; Tables 2-3</b>                                                                 |
| <b>Discussion</b>        |    |                                                                                                                                                                                              |
| Key results              | 18 | Summarise key results with reference to study objectives <b>PAGE 16</b>                                                                                                                      |
| Limitations              | 19 | Discuss limitations of the study, taking into account sources of potential bias or imprecision. Discuss both direction and magnitude of any potential bias <b>PAGE 17</b>                    |
| Interpretation           | 20 | Give a cautious overall interpretation of results considering objectives, limitations, multiplicity of analyses, results from similar studies, and other relevant evidence <b>PAGE 16-18</b> |
| Generalisability         | 21 | Discuss the generalisability (external validity) of the study results <b>PAGE 17-18</b>                                                                                                      |
| <b>Other information</b> |    |                                                                                                                                                                                              |
| Funding                  | 22 | Give the source of funding and the role of the funders for the present study and, if applicable, for the original study on which the present article is based <b>PAGE 19</b>                 |

\*Give information separately for exposed and unexposed groups.

**Note:** An Explanation and Elaboration article discusses each checklist item and gives methodological background and published examples of transparent reporting. The STROBE checklist is best used in conjunction with this article (freely available on the Web sites of PLoS Medicine at <http://www.plosmedicine.org/>, Annals of Internal Medicine at <http://www.annals.org/>, and Epidemiology at <http://www.epidem.com/>). Information on the STROBE Initiative is available at [www.strobe-statement.org](http://www.strobe-statement.org).

# BMJ Open

## Early perceptions and behavioural responses during the COVID-19 pandemic: A cross-sectional survey of UK Adults

|                                 |                                                                                                                                                                                                                                                                                                                                                                                                                                                                                                                                                                                                                                                                                                                                                                                                                                                                                                                                                                                                                       |
|---------------------------------|-----------------------------------------------------------------------------------------------------------------------------------------------------------------------------------------------------------------------------------------------------------------------------------------------------------------------------------------------------------------------------------------------------------------------------------------------------------------------------------------------------------------------------------------------------------------------------------------------------------------------------------------------------------------------------------------------------------------------------------------------------------------------------------------------------------------------------------------------------------------------------------------------------------------------------------------------------------------------------------------------------------------------|
| Journal:                        | <i>BMJ Open</i>                                                                                                                                                                                                                                                                                                                                                                                                                                                                                                                                                                                                                                                                                                                                                                                                                                                                                                                                                                                                       |
| Manuscript ID                   | bmjopen-2020-043577.R2                                                                                                                                                                                                                                                                                                                                                                                                                                                                                                                                                                                                                                                                                                                                                                                                                                                                                                                                                                                                |
| Article Type:                   | Original research                                                                                                                                                                                                                                                                                                                                                                                                                                                                                                                                                                                                                                                                                                                                                                                                                                                                                                                                                                                                     |
| Date Submitted by the Author:   | 11-Dec-2020                                                                                                                                                                                                                                                                                                                                                                                                                                                                                                                                                                                                                                                                                                                                                                                                                                                                                                                                                                                                           |
| Complete List of Authors:       | Atchison, Christina; Imperial College London, Patient Experience Research Centre, School of Public Health<br>Bowman, Leigh; Imperial College London, MRC Centre for Global Infectious Disease Analysis and Abdul Latif Jameel Institute for Disease and Emergency Analytics (J-IDEA), School of Public Health<br>Vrinten, Charlotte; Imperial College London, Centre for Health Economics & Policy Innovation, Department of Economics & Public Policy, Imperial College Business School<br>Redd, Rozlyn; Imperial College London, Patient Experience Research Centre, School of Public Health<br>Pristerà, Philippa ; Imperial College London, Patient Experience Research Centre, School of Public Health<br>Eaton, Jeffrey; Imperial College London, MRC Centre for Global Infectious Disease Analysis and Abdul Latif Jameel Institute for Disease and Emergency Analytics (J-IDEA), School of Public Health<br>Ward, Helen; Imperial College London, Patient Experience Research Centre, School of Public Health |
| <b>Primary Subject Heading</b>: | Public health                                                                                                                                                                                                                                                                                                                                                                                                                                                                                                                                                                                                                                                                                                                                                                                                                                                                                                                                                                                                         |
| Secondary Subject Heading:      | Epidemiology, Infectious diseases                                                                                                                                                                                                                                                                                                                                                                                                                                                                                                                                                                                                                                                                                                                                                                                                                                                                                                                                                                                     |
| Keywords:                       | COVID-19, EPIDEMIOLOGY, Public health < INFECTIOUS DISEASES, INFECTIOUS DISEASES                                                                                                                                                                                                                                                                                                                                                                                                                                                                                                                                                                                                                                                                                                                                                                                                                                                                                                                                      |
|                                 |                                                                                                                                                                                                                                                                                                                                                                                                                                                                                                                                                                                                                                                                                                                                                                                                                                                                                                                                                                                                                       |

SCHOLARONE™  
Manuscripts



I, the Submitting Author has the right to grant and does grant on behalf of all authors of the Work (as defined in the below author licence), an exclusive licence and/or a non-exclusive licence for contributions from authors who are: i) UK Crown employees; ii) where BMJ has agreed a CC-BY licence shall apply, and/or iii) in accordance with the terms applicable for US Federal Government officers or employees acting as part of their official duties; on a worldwide, perpetual, irrevocable, royalty-free basis to BMJ Publishing Group Ltd ("BMJ") its licensees and where the relevant Journal is co-owned by BMJ to the co-owners of the Journal, to publish the Work in this journal and any other BMJ products and to exploit all rights, as set out in our [licence](#).

The Submitting Author accepts and understands that any supply made under these terms is made by BMJ to the Submitting Author unless you are acting as an employee on behalf of your employer or a postgraduate student of an affiliated institution which is paying any applicable article publishing charge ("APC") for Open Access articles. Where the Submitting Author wishes to make the Work available on an Open Access basis (and intends to pay the relevant APC), the terms of reuse of such Open Access shall be governed by a Creative Commons licence – details of these licences and which [Creative Commons](#) licence will apply to this Work are set out in our licence referred to above.

Other than as permitted in any relevant BMJ Author's Self Archiving Policies, I confirm this Work has not been accepted for publication elsewhere, is not being considered for publication elsewhere and does not duplicate material already published. I confirm all authors consent to publication of this Work and authorise the granting of this licence.

1  
2  
3 **Early perceptions and behavioural responses during the COVID-19 pandemic: A cross-**  
4 **sectional survey of UK Adults**  
5  
6  
7

8 Christina J Atchison<sup>1</sup>, Leigh Bowman<sup>2</sup>, Charlotte Vrinten<sup>3</sup>, Rozlyn Redd<sup>1</sup>, Philippa Pristerà<sup>1</sup>,  
9 Jeffrey W Eaton<sup>2</sup>, Helen Ward<sup>1,2</sup>  
10  
11

12  
13 1 Patient Experience Research Centre, School of Public Health, Imperial College London, UK

14 2 MRC Centre for Global Infectious Disease Analysis and Abdul Latif Jameel Institute for  
15 Disease and Emergency Analytics (J-IDEA), School of Public Health, Imperial College London,  
16 UK  
17  
18

19 3 Centre for Health Economics & Policy Innovation, Department of Economics & Public  
20 Policy, Imperial College Business School, Imperial College London, UK  
21  
22  
23

24  
25 **Corresponding author:**

26 Dr Christina J Atchison, Principal Academic Clinical Fellow

27 [christina.atchison11@imperial.ac.uk](mailto:christina.atchison11@imperial.ac.uk)

28 Patient Experience Research Centre (PERC), Imperial College London, St Mary's Campus,  
29 Norfolk Place, Paddington, London W2 1PG  
30

31 ORCID ID: <https://orcid.org/0000-0001-8304-7389>  
32

33  
34 Dr Leigh Bowman, Teaching Fellow in Public Health

35 [leigh.bowman@imperial.ac.uk](mailto:leigh.bowman@imperial.ac.uk)  
36

37 Dr Charlotte Vrinten, Research Associate

38 [c.vrinten@imperial.ac.uk](mailto:c.vrinten@imperial.ac.uk)  
39

40 Dr Rozlyn Redd, Research Associate

41 [r.redd@imperial.ac.uk](mailto:r.redd@imperial.ac.uk)  
42

43 Dr Philippa Pristerà, Research Associate

44 [p.pristera@imperial.ac.uk](mailto:p.pristera@imperial.ac.uk)  
45

46 Dr Jeffrey W Eaton, Senior Lecturer

47 [jeffrey.eaton@imperial.ac.uk](mailto:jeffrey.eaton@imperial.ac.uk)  
48

49 Prof. Helen Ward, Professor of Public Health

50 [h.ward@imperial.ac.uk](mailto:h.ward@imperial.ac.uk)  
51  
52  
53  
54  
55  
56  
57

58 **Keywords:** COVID-19, novel coronavirus, epidemic, behavioural response, risk perceptions  
59  
60

**ABSTRACT**

**Objective:** To examine risk perceptions and behavioural responses of the UK adult population during the early phase of the COVID-19 epidemic in the UK.

**Design:** A cross-sectional survey

**Setting:** Conducted with a nationally representative sample of UK adults within 48 hours of the UK Government advising the public to stop non-essential contact with others and all unnecessary travel.

**Participants:** 2,108 adults living in the UK aged 18 years and over. Response rate was 84.3% (2,108/2,500). Data collected between March 17 and 18 2020.

**Main outcome measures:** Descriptive statistics for all survey questions, including number of respondents and weighted percentages. Robust Poisson regression used to identify sociodemographic variation in: (1) adoption of social-distancing measures, (2) ability to work from home, and (3) ability and (4) willingness to self-isolate.

**Results** Overall, 1,992 (94.2%) respondents reported at least one preventive measure: 85.8% washed their hands with soap more frequently; 56.5% avoided crowded areas and 54.5% avoided social events. Adoption of social-distancing measures was higher in those aged over 70 compared to younger adults aged 18 to 34 years (aRR:1.2; 95% CI:1.1,1.5). Those with lowest household income were three times less likely to be able to work from home (aRR:0.33; 95% CI:0.24 to 0.45) and less likely to be able to self-isolate (aRR:0.92; 95% CI:0.88 to 0.96). Ability to self-isolate was also lower in black and minority ethnic groups (aRR:0.89; 95% CI:0.79 to 1.0). Willingness to self-isolate was high across all respondents.

**Conclusions** Ability to adopt and comply with certain non-pharmaceutical interventions (NPIs) is lower in the most economically disadvantaged in society. Governments must implement appropriate social and economic policies to mitigate this. By incorporating these differences in NPIs among socio-economic subpopulations into mathematical models of COVID-19 transmission dynamics, our modelling of epidemic outcomes and response to COVID-19 can be improved.

**Keywords:** COVID-19, novel coronavirus, epidemic, pandemic, behavioural response, risk perceptions

## Article Summary

### Strengths and limitations of this study

- Nationally representative sample of the UK adult population
- Quick data collection during a rapidly evolving public health emergency
- Timeliness in relation to changing government response and recommendations
- The online approach excludes those without internet access
- Collecting self-report data are generally subject to limitations including honesty, introspective ability and interpretation of the questions.

For peer review only

## Introduction

On 31 December 2019, Chinese authorities notified the World Health Organisation (WHO) of an outbreak of pneumonia in Wuhan City, which was later classified as a new disease: COVID-19 [1]. Following identification of cases in countries outside China, on 30 January 2020, WHO declared the outbreak of COVID-19 a “Public Health Emergency of International Concern”[1]. In the UK, the first cases of COVID-19 were diagnosed at the end of January 2020, and community transmission was reported a few weeks later [2,3]. Government measures to control the epidemic were first announced on 22 January 2020 and included travel advice, information for those returning from affected countries, testing of suspected cases, isolation and contact tracing. This was followed in early February by a public health information campaign advising people to adopt hygiene measures to protect themselves and others, including more frequent handwashing with soap and water, using hand sanitiser if soap and water are not available, and covering mouth and nose with a tissue or sleeve when coughing or sneezing [4]. Then, on 3 March 2020, the UK Government published its action plan setting out the UK-wide response to the novel coronavirus. The UK Government’s response outlined measures in four key areas: containing the outbreak, delaying its spread, mitigating the impact, and research to improve diagnostics and treatment [5].

On March 16 2020, five days after the WHO declared the outbreak of COVID-19 a pandemic, the UK Prime Minister announced a shift to the delay phase of the UK response with measures aimed at suppressing the spread of the infection in the population through non-pharmaceutical interventions (NPIs), including social distancing of the whole population, isolation of cases for 7 days and quarantine of their household members for 14 days [6]. The public was advised to stop non-essential contact with others and all unnecessary travel: including working from home where possible and avoiding pubs, theatres, restaurants and other social venues [6]. This shift in response was prompted by a mathematical modelling study which showed that a combination of social distancing of the entire population, home isolation of cases and household quarantine of their family members (and possible school and university closure) was required to suppress transmission to a level that would enable the NHS to cope with the surge in cases requiring hospital admission and ventilation [7].

The effect of NPIs to reduce transmission rates is dependent on compliance with public health advice on social distancing. In the initial stages of the UK epidemic, this advice was voluntary, and not enforced by the government. This was criticised due to concern that



1  
2  
3 measures may not have the desired impact if a significant proportion of the population were  
4  
5 unable or unwilling to comply.  
6  
7

8 Protective behaviours are not uniformly adopted throughout a population during an  
9  
10 epidemic. Evidence from influenza outbreaks suggests that females are more likely to adopt  
11  
12 NPIs than males [8,9]. In the UK, during the H1N1 pandemic, non-white ethnic groups were  
13  
14 more likely to adopt hygiene and social distancing behaviours compared to white [10,11].  
15  
16 Employment status has also been associated with NPI adoption [12,13]. Evidence from  
17  
18 Australia during the H1N1 pandemic found those who were self-employed and who were  
19  
20 unable to work from home were most likely to report intentions to not comply with  
21  
22 preventative measures [13], suggesting that without support, it may be challenging for  
23  
24 individuals who are unable to work from home to comply with certain public health  
25  
26 recommendations. During the current COVID-19 pandemic, public risk perceptions and  
27  
28 knowledge have been explored in various countries [14-20]. However, only a few have  
29  
30 identified the factors associated with greater adoption of preventative measures, or how  
31  
32 these associations vary by context. In Hong Kong, both greater understanding of COVID-19  
33  
34 and increased anxiety were associated with greater adoption of social distancing behaviours  
35  
36 [18].

37  
38 As such, this study aimed to assess reported behaviour and intention to comply with the  
39  
40 NPIs, as recommended by the UK Government at the time of the survey. Preliminary findings  
41  
42 were shared with the Scientific Advisory Group for Emergencies (SAGE), which advises the  
43  
44 UK Government's response to COVID-19 [21].

## 45 **Methods**

### 46 **Study design and sample**

47 A cross-sectional survey of a nationally representative sample of the UK adult (aged 18 years  
48  
49 and over) population was conducted between March 17 and 18 2020, which followed the UK  
50  
51 Government's 16 March announcement to increase social distancing measures by advising  
52  
53 the public to stop non-essential contact with others and all unnecessary travel [6].

54  
55 The online survey was administered by YouGov, a market research company, to members of  
56  
57 its UK panel of 800,000+ individuals [22]. This panel includes individuals who have  
58  
59 specifically opted in to participate in online research activities. YouGov actively recruits hard-  
60

1  
2  
3 to-reach individuals to this panel (such as younger people and those from ethnic minorities)  
4 via a network of partners with specific experience in recruiting these audiences for online  
5 activities or with access to a wide range of online sources that cater to these groups.  
6  
7  
8  
9

10 A sample of 2,108 adults was achieved through non-probabilistic quota sampling [22]. Emails  
11 were sent to 2,500 panellists from the base sample, randomly selecting panellists with  
12 particular age, sex, ethnicity and UK geographical region of residence characteristics to  
13 achieve quotas that matched the proportions of people with those characteristics in the UK  
14 2011 census data [23]. The response rate was 84.3% (2,108/2,500). No incentive was given  
15 to participate in the survey.  
16  
17  
18  
19  
20

### 21 **Survey Instrument**

22 The questionnaire was adapted from a survey used in a similar study conducted in Hong  
23 Kong [24]. The questionnaire had four components: (1) socio-demographic characteristics,  
24 (2) risk perceptions towards COVID-19, (3) preventive behaviours, and (4) ability and  
25 willingness to self-isolate.  
26  
27  
28  
29  
30

31 *Socio-demographic characteristics* consisted of sex, age, ethnicity, marital status, caring  
32 responsibilities, UK area of residence, and socio-economic status (SES). SES was assessed  
33 using five indicators: education level, employment status, household income, savings, and  
34 household tenure.  
35  
36  
37  
38  
39

40 *Risk perceptions towards COVID-19* were measured by perceived susceptibility and  
41 perceived severity. Susceptibility was measured by asking respondents about perceived  
42 likelihood of being infected with COVID-19 under the UK Government's current preventive  
43 measures. Severity was measured by asking respondents about perceived seriousness of  
44 symptoms if they were infected with COVID-19.  
45  
46  
47  
48  
49

50 *Preventive behaviours* included information on perceived effectiveness and actual adoption  
51 of preventive behaviours (to protect oneself and others), to prevent both contracting  
52 COVID-19 and onward transmission, and were collected under three categories: (1) hygiene  
53 practices (wearing a face mask, washing hands more frequently with soap and water, using  
54 hand sanitiser more regularly, disinfecting the home, covering nose and mouth when  
55 sneezing or coughing) (2) travel avoidance (travel to affected countries and travel to areas  
56  
57  
58  
59  
60

1  
2  
3 inside and outside the UK, regardless of whether they were affected) (3) social distancing  
4 (avoiding public transport, social events, going out in general, going to hospital or other  
5 healthcare settings, crowded places, and contact with people who have a fever or  
6 respiratory symptoms).  
7  
8  
9

10  
11 *Willingness to self-isolate* was measured by asking respondents whether, if advised by a  
12 healthcare professional, they would be willing to self-isolate. Similarly, *ability to self-isolate*  
13 was measured by asking respondents whether, if advised by a healthcare professional, they  
14 would be able to self-isolate.  
15  
16  
17

18  
19  
20 At the time the survey was conducted, Public Health England's operational definition of 'self-  
21 isolation' was "*if you have symptoms of coronavirus infection (COVID-19), however mild, do*  
22 *not leave your home (even to buy food or essentials) or have any visitors for 7 days from*  
23 *when your symptoms started. This includes not going to work, school or other public places,*  
24 *and avoiding public transport or taxis. Self-isolation is the same as voluntary*  
25 *quarantine.*"[25]  
26  
27  
28  
29

30  
31 We worked with YouGov to optimise question clarity and ease of understanding for the UK  
32 population.  
33  
34

35  
36 The survey instrument is freely available to download from the School of Public Health,  
37 Imperial College London COVID-19 resources webpage:  
38 [http://www.imperial.ac.uk/medicine/departments/school-public-health/infectious-disease-](http://www.imperial.ac.uk/medicine/departments/school-public-health/infectious-disease-epidemiology/mrc-global-infectious-disease-analysis/covid-19/covid-19-scientific-resources/)  
39 [epidemiology/mrc-global-infectious-disease-analysis/covid-19/covid-19-scientific-resources/](http://www.imperial.ac.uk/medicine/departments/school-public-health/infectious-disease-epidemiology/mrc-global-infectious-disease-analysis/covid-19/covid-19-scientific-resources/)  
40  
41  
42  
43

#### 44 **Data Collection**

45  
46 Data were collected between 1630 GMT on 17 March 2020 and 1030 GMT on 18 March  
47 2020. Participants identified for the sample were sent an email with a survey link. YouGov  
48 returned the anonymised data set to the Imperial College London research team for analysis.  
49  
50  
51

#### 52 **Data Analysis**

53  
54 Analyses were conducted in Stata 15 and SPSS version 25.  
55  
56

57  
58 Descriptive statistics for all variables present the number of respondents and the weighted  
59 percentages. Percentages were weighted for age, sex, region and ethnicity to account for  
60

1  
2  
3 variation in response rates, so as to be representative of the population (18+ years) of the  
4 UK. Details of the weighting approach used and the sample population profile are in the  
5 Supplement, S1.  
6  
7  
8  
9

10 For analysis, age, collected as discrete count in years, was collapsed into four age bands  
11 routinely used in the UK to report COVID-19 related data. Ethnicity data were collected using  
12 the 18 response categories used in the UK 2011 Census [23] but were collapsed into two  
13 categories (white / Black, Asian and minority ethnic (BAME)) because of small numbers of  
14 respondents in BAME groups.  
15  
16  
17  
18  
19

20 Robust Poisson regression, by estimating relative risk (RR), was used to identify  
21 sociodemographic variation in: (1) adoption of social-distancing measures, (2) ability to work  
22 from home, and (3) ability and (4) willingness to self-isolate. Adoption of social distancing  
23 measures was proxied by respondents reporting to have avoided crowded places and social  
24 events to protect themselves or others from COVID-19. For our outcomes of interest, an  
25  $RR > 1$  indicated that the group was more likely to (1) adopt social distancing measures, (2) be  
26 able to work from home, and (3) be able and (4) willing to self-isolate relative to the  
27 reference group for that independent variable.  
28  
29  
30  
31  
32  
33  
34

35 Age and sex were retained in all the regression models as they are considered important  
36 confounders. Including as many explanatory variables as possible can dilute true associations  
37 and lead to large standard errors with wide and imprecise confidence intervals, or,  
38 conversely, identify spurious associations [26]. The conventional technique is to first run the  
39 univariate analyses and then use only those variables which meet a pre-set cut-off for  
40 significance to run a multivariable model [26]. This cut-off is often more liberal than the  
41 conventional cut-off for significance (e.g.,  $P < 0.20$ , instead of the usual  $P < 0.05$ ) since its  
42 purpose is to identify potential predictor variables rather than to test a hypothesis [26].  
43 Therefore, only variables that appeared to be associated ( $p < 0.20$ ) in the unadjusted analyses  
44 were considered in the adjusted analyses. Adjusted relative risk (aRR) and 95% confidence  
45 intervals (CI) were estimated. Associations with a p-value  $< 0.05$  in the adjusted analyses  
46 were considered to be statistically significant. We did not adjust our p-values for multiple  
47 comparisons to reduce type I errors for null associations because this increases type II errors  
48 for those associations that are not null [27,28]. Not adjusting for multiple comparisons in the  
49 context of this study is preferable because it will result in less errors of interpretation as the  
50  
51  
52  
53  
54  
55  
56  
57  
58  
59  
60

1  
2  
3 data under examination are not random numbers but actual observations on people.  
4  
5 Furthermore, in the context of a global pandemic caused by an emerging infectious disease  
6  
7 it may be better to explore leads that may turn out to be wrong than risk missing possibly  
8  
9 important findings that could provide insights for control of the virus.

10  
11 We tested for collinearity between education level, employment status, household income,  
12  
13 savings, and household tenure. For these categorical variables, collinearity was measured by  
14  
15 examining bivariate relationships using Pearson's Chi-squared tests. Where collinearity was  
16  
17 detected we ran separate adjusted regression analyses for those variables, using only other  
18  
19 explanatory variables in those models that were not strongly correlated.

### 20 21 **Patient and Public Involvement**

22  
23 Prior to conducting the study, we distributed an online feedback form to communities across  
24  
25 the UK using local networks of public partners and contacts, Twitter and via VOICE-  
26  
27 global.org, an online platform for public involvement in research established by Newcastle  
28  
29 University. We received 420 responses, including 328 from members of the public. The  
30  
31 experiences and feedback shared guided our study design and scope, including the phrasing  
32  
33 of the survey tool's closed-ended questions and the refinement of pre-populated answer  
34  
35 choices.

36  
37 Study results will be shared with the public both by posting on the VOICE-global.org news  
38  
39 page, on the research team's website, and through direct mail with those who consented to  
40  
41 be contacted about our research and involvement activity.

### 42 43 **Ethical approval**

44  
45 The Imperial College London Research Ethics Committee approved the study (Ref 20IC5861).  
46  
47 Informed consent was obtained from those who chose to complete the survey after having  
48  
49 read introductory information on its content and purpose.

### 50 51 **Results**

52  
53 The overall sample is described in Table 1. There was lower response among people from  
54  
55 minority ethnic groups and older age groups compared to the UK population profile  
56  
57 (Supplement, S1 for full details of the sample profile compared to UK population profile). In  
58  
59 summary, of the 2,108 respondents, 11.1% were 18 to 24 years old, and 13.5% were 70  
60

1  
2  
3 years or older. The majority of respondents were white (93·9%). In total, 43·4% were in full-  
4 time work and 14·1% were in part-time work.  
5  
6

7  
8 Overall, 77·4% (1,640/2,108) of respondents reported being worried about the COVID-19  
9 outbreak in the UK. None of the 2,108 respondents had previously tested positive for COVID-  
10 19, and 47·5% (979/2,108) believed that it was likely they would be infected at some point in  
11 the future under the UK Government's preventive measures. If infected, just over half  
12 (56·9%) of respondents would expect to be moderately severely affected (e.g. may need  
13 self-care and rest in bed) (Table 1).  
14  
15  
16  
17

18  
19 Accordingly, 94·2% of adults reported taking at least one preventive measure (to protect  
20 oneself and others) against COVID-19 infection: 85·8% washed their hands with soap more  
21 frequently; 56·5% avoided crowded areas; 54·5% avoided social events and 39·2% avoided  
22 public transport (Figure 1). Most reported that their behaviour change was in response to  
23 government guidance (71·3%). Preventive measures perceived to be most effective were  
24 washing hands more frequently with soap and water (92·5%), avoiding contact with people  
25 who have a fever or respiratory symptoms (91·4%), and covering nose and mouth when  
26 sneezing or coughing (90·0%) (Figure 1). Perceived effectiveness of preventive measures was  
27 higher than actual adoption for all measures. This was particularly marked for social  
28 distancing measures (Figure 1).  
29  
30  
31  
32  
33  
34  
35  
36  
37

### 38 **Adoption of social-distancing measures**

39  
40 Overall, 45·2% of respondents reported adopting social distancing measures (avoiding  
41 crowded places and avoiding social events) to protect themselves or others from COVID-19.  
42  
43  
44

45 Table 2 shows the regression analysis results for adoption of social-distancing measures.  
46 Being 70 years or older (64·2% vs. 38·4%; aRR:1·2; 95% CI:1·1,1·5) was positively associated  
47 with greater adoption compared to younger adults aged 18 to 34 years. Compared with  
48 those who were married, in a civil partnership, or living as married (48·4%), respondents  
49 who were separated, divorced, or widowed (44·1%; aRR:0·75; 95% CI:0·64,0·87) or never  
50 married (38·4%; aRR:0·74; 0·63,0·88) were less likely to have adopted social distancing  
51 measures to prevent transmission of COVID-19. Respondents with £100 savings or less were  
52 a fifth less likely to have adopted social distancing measures compared to those with  
53 £25,000 or more in savings (43·5% vs. 48·4%; aRR:0·83; 95% CI:0·73,0·95) (Table 2).  
54  
55  
56  
57  
58  
59  
60

**Table 1. Demographics, socio-economic characteristics and COVID-19 risk perceptions, N=2,108**

| Characteristic                                             | No.  | Weighted % |
|------------------------------------------------------------|------|------------|
| <b>Demographic and socio-economic</b>                      |      |            |
| <b>Age (years)</b>                                         |      |            |
| 18-24                                                      | 218  | 11.1       |
| 25-34                                                      | 294  | 14.4       |
| 35-44                                                      | 396  | 19.3       |
| 45-54                                                      | 355  | 17.5       |
| 55-69                                                      | 519  | 24.2       |
| 70 or above                                                | 326  | 13.5       |
| <b>Sex</b>                                                 |      |            |
| Male                                                       | 987  | 48.0       |
| Female                                                     | 1094 | 50.7       |
| Prefer not to say                                          | 27   | 1.3        |
| <b>Ethnicity</b>                                           |      |            |
| White                                                      | 1985 | 93.9       |
| Asian/Asian British                                        | 48   | 2.4        |
| Black / African / Caribbean / Black British                | 20   | 1.0        |
| Other ethnic group, including mixed/multiple ethnic groups | 39   | 1.9        |
| Prefer not to say                                          | 16   | 0.77       |
| <b>Marital status</b>                                      |      |            |
| Married, civil partnership, or living as married           | 1283 | 60.3       |
| Separated, divorced, or widowed                            | 270  | 12.2       |
| Never married                                              | 545  | 27.1       |
| Prefer not to say                                          | 10   | 0.45       |
| <b>Area of residence</b>                                   |      |            |
| London                                                     | 239  | 13.1       |
| North                                                      | 522  | 23.3       |
| Midlands                                                   | 531  | 25.2       |
| South                                                      | 485  | 22.5       |
| N. Ireland, Scotland, Wales                                | 331  | 15.9       |
| <b>Education</b>                                           |      |            |
| No formal qualification                                    | 121  | 5.5        |
| Secondary-level qualification                              | 859  | 42.1       |
| Post-secondary-level, below bachelor                       | 148  | 6.9        |
| Bachelor-level or above                                    | 664  | 30.8       |
| Other technical, professional or higher qualification      | 245  | 11.2       |
| Don't Know                                                 | 32   | 1.6        |
| Prefer not to say                                          | 39   | 2.0        |
| <b>Employment status</b>                                   |      |            |
| Working full time                                          | 889  | 43.4       |
| Working part time                                          | 292  | 14.1       |
| Full time student                                          | 112  | 5.6        |
| Retired                                                    | 553  | 23.6       |
| Unemployed or not working                                  | 207  | 10.5       |
| Other                                                      | 55   | 2.8        |
| <b>Household income</b>                                    |      |            |
| <£20,000                                                   | 440  | 20.7       |
| £20,000 to £29,999                                         | 355  | 16.8       |
| £30,000-£49,999                                            | 472  | 22.4       |
| £50,000 and over                                           | 429  | 20.6       |
| Don't know                                                 | 103  | 5.1        |

|                                                                               |      |      |
|-------------------------------------------------------------------------------|------|------|
| Prefer not to say                                                             | 309  | 14.4 |
| <b>Savings</b>                                                                |      |      |
| Less than £100                                                                | 278  | 13.6 |
| £100 to £999                                                                  | 242  | 11.8 |
| £1,000 to £4,999                                                              | 305  | 14.5 |
| £5,000 to £24,999                                                             | 359  | 16.6 |
| £25,000 or more                                                               | 359  | 16.6 |
| Prefer not to say                                                             | 565  | 26.9 |
| <b>Housing tenure</b>                                                         |      |      |
| Own – outright                                                                | 681  | 30.4 |
| Own – mortgage/shared ownership                                               | 639  | 30.8 |
| Rent – private landlord                                                       | 319  | 15.6 |
| Rent – local authority/housing association                                    | 219  | 10.7 |
| Live with parents, family or friends                                          | 215  | 10.7 |
| Other                                                                         | 35   | 1.8  |
| <b>COVID-19 risk perceptions</b>                                              |      |      |
| <b>Level of worry about the current COVID-19 outbreak in the UK</b>           |      |      |
| Worried                                                                       | 1640 | 77.4 |
| Not worried                                                                   | 454  | 21.9 |
| Don't know                                                                    | 14   | 0.74 |
| <b>Perceived susceptibility<sup>a</sup></b>                                   |      |      |
| Likely                                                                        | 979  | 47.5 |
| Neither likely or unlikely                                                    | 547  | 26.2 |
| Unlikely                                                                      | 337  | 15.9 |
| Don't know                                                                    | 220  | 10.5 |
| <b>Perceived severity<sup>b</sup></b>                                         |      |      |
| I would expect it to be life-threatening                                      | 103  | 4.7  |
| I would expect it to be severe (e.g. may need care and treatment in hospital) | 306  | 14.2 |
| I would expect it to be moderate (e.g. may need self-care and rest in bed)    | 1180 | 56.9 |
| I would expect it to be mild (e.g. can go about daily tasks normally)         | 351  | 17.2 |
| I would expect to have no symptoms                                            | 33   | 1.7  |
| Don't know                                                                    | 110  | 5.3  |

<sup>a</sup>Under the UK government's current preventive measures (at the time of the study), how likely or unlikely do you think it is you will be infected with the coronavirus (COVID-19) at any point in the future?

<sup>b</sup>Please imagine you were infected with coronavirus (i.e. COVID-19), which of the following do you think would best apply?

**Figure 1. Perceived effectiveness and actual adoption of preventative measures to prevent transmission of COVID-19; N=2,108**



Table 2. Social distancing behaviour and ability to work from home by a range of sociodemographic factors, N=2,108

|                                                  | Social distancing measures being taken yes vs no <sup>a</sup> |            |                            |                            | Able to work from home yes vs no (N=1,149) <sup>d</sup> |            |                          |                      |
|--------------------------------------------------|---------------------------------------------------------------|------------|----------------------------|----------------------------|---------------------------------------------------------|------------|--------------------------|----------------------|
|                                                  | N                                                             | Weighted % | Unadjusted RR (95% CI)     | Adjusted RR (95% CI)       | N                                                       | Weighted % | Unadjusted RR (95% CI)   | Adjusted RR (95% CI) |
| <b>Social distancing</b>                         |                                                               |            |                            |                            |                                                         |            |                          |                      |
| Yes                                              | 969                                                           | 45.2       |                            |                            |                                                         |            |                          |                      |
| No                                               | 1,139                                                         | 54.8       |                            |                            |                                                         |            |                          |                      |
| <b>Ability to work from home</b>                 |                                                               |            |                            |                            |                                                         |            |                          |                      |
| Yes                                              |                                                               |            |                            |                            | 540                                                     | 44.3       |                          |                      |
| No                                               |                                                               |            |                            |                            | 609                                                     | 53.0       |                          |                      |
| Don't Know                                       |                                                               |            |                            |                            | 32                                                      | 2.7        |                          |                      |
| <b>Age</b>                                       |                                                               |            |                            |                            |                                                         |            |                          |                      |
| 18-34                                            | 202                                                           | 38.4       | Ref                        | Ref <sup>b</sup>           | 154                                                     | 48.0       | Ref                      | Ref <sup>e</sup>     |
| 35-49                                            | 229                                                           | 40.8       | 1.1 (0.91-1.2)             | 0.86 (0.74-1.0)            | 220                                                     | 48.0       | 1.0 (0.86-1.2)           | 0.98 (0.94-1.3)      |
| 50-69                                            | 329                                                           | 46.4       | <b>1.2 (1.1-1.4)**</b>     | 0.81 (0.73-1.0)            | 151                                                     | 39.9       | <b>0.83 (0.70-0.99)*</b> | 0.90 (0.81-1.1)      |
| 70 or older                                      | 209                                                           | 64.2       | <b>1.7 (1.5-1.9)***</b>    | <b>1.2 (1.1-1.5)*</b>      | 15                                                      | 53.9       | 1.1 (0.78-1.6)           | 1.1 (0.96-1.7)       |
| <b>Sex</b>                                       |                                                               |            |                            |                            |                                                         |            |                          |                      |
| Male                                             | 436                                                           | 42.9       | Ref                        | Ref <sup>b</sup>           | 280                                                     | 46.1       | Ref                      | Ref <sup>e</sup>     |
| Female                                           | 519                                                           | 47.4       | <b>1.1 (1.0-1.2)*</b>      | 1.0 (0.88-1.2)             | 254                                                     | 44.8       | 0.97 (0.85-1.1)          | 0.98 (0.86-1.2)      |
| <b>Ethnicity</b>                                 |                                                               |            |                            |                            |                                                         |            |                          |                      |
| White                                            | 919                                                           | 45.5       | Ref                        | -                          | 506                                                     | 45.1       | Ref                      | Ref <sup>e</sup>     |
| Black, Asian and minority ethnic                 | 45                                                            | 42.1       | 0.92 (0.73-1.2)            |                            | 31                                                      | 54.2       | 1.2 (0.94-1.5)           | 1.0 (0.98-1.1)       |
| <b>Marital status</b>                            |                                                               |            |                            |                            |                                                         |            |                          |                      |
| Married, civil partnership, or living as married | 628                                                           | 48.4       | Ref                        | Ref <sup>b</sup>           | 366                                                     | 47.2       | Ref                      | -                    |
| Separated, divorced, or widowed                  | 121                                                           | 44.1       | 0.91 (0.79-1.1)            | <b>0.75 (0.64-0.87)***</b> | 43                                                      | 39.5       | 0.84 (0.65-1.1)          |                      |
| Never married                                    | 214                                                           | 38.4       | <b>0.79 (0.70-0.90)***</b> | <b>0.74 (0.63-0.88)**</b>  | 128                                                     | 43.5       | 0.92 (0.79-1.1)          |                      |
| <b>Area of residence</b>                         |                                                               |            |                            |                            |                                                         |            |                          |                      |
| London                                           | 111                                                           | 45.2       | Ref                        | -                          | 76                                                      | 54.0       | Ref                      | Ref <sup>e</sup>     |
| North of England                                 | 220                                                           | 41.6       | 0.92 (0.77-1.1)            |                            | 129                                                     | 44.7       | 0.83(0.67-1.0)           | 1.0 (0.76-1.2)       |
| Midlands and East of England                     | 249                                                           | 46.0       | 1.0 (0.86-1.2)             |                            | 123                                                     | 44.4       | 0.82 (0.67-1.0)          | 1.0 (0.75-1.1)       |
| South of England                                 | 221                                                           | 45.0       | 0.99 (0.84-1.2)            |                            | 151                                                     | 49.0       | 0.91 (0.75-1.1)          | 1.0 (0.88-1.4)       |

|                                                 |     |      |                            |                            |     |      |                            |                            |
|-------------------------------------------------|-----|------|----------------------------|----------------------------|-----|------|----------------------------|----------------------------|
| N. Ireland, Scotland, Wales                     | 168 | 49.9 | 1.1 (0.92-1.3)             |                            | 61  | 35.2 | <b>0.65 (0.50-0.84)**</b>  | 0.76 (0.59-1.0)            |
| <b>Education</b>                                |     |      |                            |                            |     |      |                            |                            |
| Degree or above                                 | 321 | 48.0 | Ref                        | -                          | 289 | 62.6 | Ref                        | Ref <sup>f</sup>           |
| Post-secondary                                  | 186 | 46.7 | 0.97 (0.85-1.1)            |                            | 105 | 47.7 | <b>0.76 (0.65-0.89)**</b>  | <b>0.68 (0.59-0.79)***</b> |
| Secondary or below                              | 436 | 43.7 | 0.91 (0.82-1.0)            |                            | 137 | 29.4 | <b>0.47 (0.40-0.55)***</b> | <b>0.45 (0.39-0.53)***</b> |
| <b>Employment status</b>                        |     |      |                            |                            |     |      |                            |                            |
| Working full time                               | 344 | 38.6 | Ref                        | Ref <sup>b</sup>           | 439 | 48.9 | Ref                        | Ref <sup>f</sup>           |
| Working part time                               | 136 | 46.8 | <b>1.2 (1.0-1.4)*</b>      | 1.0 (0.86-1.2)             | 101 | 35.0 | <b>0.71 (0.60-0.85)***</b> | 0.93 (0.84-1.2)            |
| Full time student                               | 43  | 36.3 | 0.94 (0.73-1.2)            | 1.0 (0.71-1.5)             | N/A | N/A  | N/A                        | N/A                        |
| Retired                                         | 331 | 59.7 | <b>1.5 (1.4-1.7)***</b>    | 1.1 (0.90-1.3)             | N/A | N/A  | N/A                        | N/A                        |
| Unemployed / Not working                        | 95  | 45.4 | 1.2 (0.99-1.4)             | 1.1 (0.90-1.4)             | N/A | N/A  | N/A                        | N/A                        |
| <b>Household income</b>                         |     |      |                            |                            |     |      |                            |                            |
| £50,000 and over                                | 178 | 41.0 | Ref                        | Ref <sup>c</sup>           | 241 | 67.3 | Ref                        | Ref <sup>g</sup>           |
| £30,000 to £49,999                              | 211 | 43.8 | 1.1 (0.92-1.2)             | 1.0 (0.87-1.2)             | 131 | 42.6 | <b>0.63 (0.54-0.74)***</b> | <b>0.55 (0.47-0.63)***</b> |
| £20,000 to £29,999                              | 173 | 48.5 | <b>1.2 (1.0-1.4)*</b>      | 1.1 (0.89-1.3)             | 64  | 30.7 | <b>0.46 (0.37-0.57)***</b> | <b>0.41 (0.33-0.52)***</b> |
| <£20,000                                        | 218 | 49.0 | <b>1.2 (1.0-1.4)*</b>      | 1.0 (0.87-1.2)             | 31  | 22.7 | <b>0.34 (0.24-0.47)***</b> | <b>0.33 (0.24-0.45)***</b> |
| <b>Savings</b>                                  |     |      |                            |                            |     |      |                            |                            |
| £25,000 or more                                 | 177 | 48.4 | Ref                        | Ref <sup>c</sup>           | 100 | 59.9 | Ref                        | Ref <sup>g</sup>           |
| £5,000 to £24,999                               | 177 | 48.7 | 1.0 (0.86-1.2)             | 1.1 (0.93-1.3)             | 131 | 57.6 | 0.96 (0.81-1.1)            | 0.90 (0.76-1.1)            |
| £1,000 to £4,999                                | 126 | 40.7 | 0.84 (0.71-1.0)            | <b>0.76 (0.67-0.87)***</b> | 89  | 43.7 | <b>0.73 (0.59-0.90)**</b>  | <b>0.67 (0.54-0.83)***</b> |
| £100 to £999                                    | 91  | 37.4 | <b>0.77 (0.63-0.94)*</b>   | <b>0.73 (0.61-0.87)***</b> | 67  | 40.1 | <b>0.67 (0.53-0.84)**</b>  | <b>0.64 (0.50-0.81)***</b> |
| Less than £100                                  | 122 | 43.5 | 0.90 (0.76-1.1)            | <b>0.83 (0.73-0.95)***</b> | 54  | 33.1 | <b>0.55 (0.43-0.71)***</b> | <b>0.51 (0.39-0.67)***</b> |
| <b>Housing tenure</b>                           |     |      |                            |                            |     |      |                            |                            |
| Own outright                                    | 377 | 55.0 | Ref                        | Ref <sup>c</sup>           | 93  | 41.0 | Ref                        | Ref <sup>g</sup>           |
| Own with mortgage/shared ownership              | 261 | 40.8 | <b>0.74 (0.66-0.83)***</b> | 0.95 (0.82-1.1)            | 293 | 55.0 | <b>1.3 (1.1- 1.6)**</b>    | 1.0 (0.73-1.5)             |
| Rented from private landlord                    | 145 | 45.0 | <b>0.82 (0.71-0.94)**</b>  | 1.1 (0.90-1.3)             | 85  | 39.8 | 0.97 (0.77-1.2)            | 0.92 (0.83-1.1)            |
| Rented from local authority/housing association | 94  | 42.2 | <b>0.77 (0.65-0.91)**</b>  | 0.90 (0.75-1.1)            | 16  | 18.2 | <b>0.44 (0.27-0.72)**</b>  | <b>0.45 (0.28-0.73)**</b>  |
| Live with parents, family, or friends           | 78  | 35.4 | <b>0.64 (0.53-0.78)***</b> | 0.93 (0.70-1.2)            | 46  | 43.6 | 1.1 (0.81-1.4)             | 0.79 (0.65-1.0)            |

<sup>a</sup>Those that report avoiding crowded areas AND social events; <sup>b</sup>Mutually adjusted for age, sex, marital status, employment status, household income, savings and housing tenure; <sup>c</sup>Adjusted for age, sex, marital status and employment status. <sup>d</sup>Excluding those who responded "Don't know"; <sup>e</sup>Mutually adjusted for age, sex, ethnicity, UK area of residence, education, employment status, household income, savings and housing tenure; <sup>f</sup>Adjusted for age, sex, ethnicity, UK area of residence and housing tenure; <sup>g</sup>Adjusted for age, sex, ethnicity and UK area of residence. \*p<.05, \*\*p<.01, \*\*\*p<.001

### Ability to work from home

Overall, 44.3% of respondents reported being able to work from home (i.e. permitted by their employer and have the necessary equipment to do their job from home).

Respondents who held post-secondary but below degree-level (47.7%; aRR:0.68; 95% CI:0.59,0.79) and secondary or below level (29.4%; aRR:0.45; 95% CI:0.39,0.53) education qualifications were less likely to be able to work from home compared with those educated to degree level (62.6%) (Table 2). As with educational level, there was a household income and savings gradient with ability to work from home. Those with the lowest household income (<£20,000) were three times less likely to be able to work from home compared to those with household incomes of £50,000 and above (22.7% vs. 67.3%; aRR:0.33; 95% CI:0.24,0.45). Respondents with £100 savings or less were half as likely to be able to work from home compared to those with £25,000 or more in savings (33.1% vs. 59.9%; aRR:0.51; 95% CI:0.39,0.67) (Table 2). Compared with those who owned their home outright, those renting accommodation from a local authority or housing association were less likely to be able to work from home (18.2% vs. 41.0%; aRR:0.45; 95% CI:0.28,0.73).

### Willingness and ability to self-isolate

Overall, perceived ability (87.0%) and willingness (87.6%) to self-isolate for 7 days if asked by a healthcare professional were high.

In terms of socio-demographic associations, there was no effect of sex on perceived ability to self-isolate (Table 3). However, women were somewhat more willing to do so than men (94.9% vs. 91.8%; aRR:1.1; 95% CI:1.0,1.2). Respondents from ethnic minority backgrounds perceived themselves to be less able to self-isolate than respondents from white backgrounds (84.8% vs. 92.1%, aRR:0.89; 95% CI:0.79 to 1.0), although they were equally willing to do so (Table 3).

Some indicators of socioeconomic status were significantly associated with perceived ability and willingness to self-isolate. Respondents who held post-secondary but below degree-level education qualifications were less willing to self-isolate (90.9% vs. 94.9% aRR:0.95; 95% CI:0.92,0.99) than respondents educated to degree level (Table 3). Those with household incomes below £20,000 were less likely to be able to self-isolate compared with those on

Table 3. Ability and willingness to self-isolate by sociodemographic factors

|                                                  | Able to self-isolate yes vs no (N=2,002) <sup>a</sup> |            |                          |                         | Willing to self-isolate yes vs no (N=1,978) <sup>a</sup> |            |                          |                       |
|--------------------------------------------------|-------------------------------------------------------|------------|--------------------------|-------------------------|----------------------------------------------------------|------------|--------------------------|-----------------------|
|                                                  | N                                                     | Weighted % | Unadjusted RR (95% CI)   | Adjusted RR (95% CI)    | N                                                        | Weighted % | Unadjusted RR (95% CI)   | Adjusted RR (95% CI)  |
| <b>Self-isolation ability/willingness</b>        |                                                       |            |                          |                         |                                                          |            |                          |                       |
| Yes, I would                                     | 1,834                                                 | 87.0       |                          |                         | 1,847                                                    | 87.6       |                          |                       |
| No, I wouldn't                                   | 168                                                   | 8.0        |                          |                         | 131                                                      | 6.2        |                          |                       |
| Don't know                                       | 106                                                   | 5.0        |                          |                         | 130                                                      | 6.2        |                          |                       |
| <b>Age</b>                                       |                                                       |            |                          |                         |                                                          |            |                          |                       |
| 18-34                                            | 466                                                   | 90.8       | Ref                      | Ref <sup>b</sup>        | 457                                                      | 91.6       | Ref                      | Ref <sup>d</sup>      |
| 35-49                                            | 494                                                   | 90.0       | 0.99 (0.95-1.1)          | 1.0 (0.96-1.1)          | 508                                                      | 94.2       | 1.0 (0.99-1.1)           | 1.0 (0.98-1.1)        |
| 50-69                                            | 614                                                   | 92.2       | 1.0 (0.98-1.1)           | 1.0 (0.97-1.1)          | 627                                                      | 93.6       | 1.0 (0.99-1.1)           | 1.0 (0.96-1.1)        |
| 70 or older                                      | 262                                                   | 94.9       | <b>1.1 (1.0-1.2)*</b>    | 1.0 (0.96-1.1)          | 255                                                      | 94.4       | 1.0 (0.99-1.1)           | 1.0 (0.96-1.1)        |
| <b>Sex</b>                                       |                                                       |            |                          |                         |                                                          |            |                          |                       |
| Male                                             | 878                                                   | 90.7       | Ref                      | Ref <sup>b</sup>        | 878                                                      | 91.8       | Ref                      | Ref <sup>d</sup>      |
| Female                                           | 957                                                   | 92.5       | 1.0 (0.99-1.1)           | 1.0 (0.98-1.1)          | 969                                                      | 94.9       | <b>1.1 (1.0-1.2)**</b>   | <b>1.1 (1.0-1.2)*</b> |
| <b>Ethnicity</b>                                 |                                                       |            |                          |                         |                                                          |            |                          |                       |
| White                                            | 1,737                                                 | 92.1       | Ref                      | Ref <sup>b</sup>        | 1,751                                                    | 93.7       | Ref                      | Ref <sup>d</sup>      |
| Black, Asian and minority ethnic                 | 89                                                    | 84.8       | <b>0.92 (0.84-0.99)*</b> | <b>0.89 (0.79-1.0)*</b> | 86                                                       | 87.8       | 0.94 (0.87-1.0)          | 0.96 (0.87-1.1)       |
| <b>Marital status</b>                            |                                                       |            |                          |                         |                                                          |            |                          |                       |
| Married, civil partnership, or living as married | 1,128                                                 | 92.3       | Ref                      | -                       | 1,143                                                    | 94.5       | Ref                      | Ref <sup>d</sup>      |
| Separated, divorced, or widowed                  | 215                                                   | 90.7       | 0.98 (0.94-1.2)          |                         | 219                                                      | 92.8       | 0.98 (0.95-1.1)          | 0.98 (0.93-1.1)       |
| Never married                                    | 482                                                   | 90.3       | 0.97 (0.95-1.1)          |                         | 477                                                      | 91.0       | <b>0.96 (0.93-0.99)*</b> | 0.99 (0.95-1.1)       |
| <b>Area of residence</b>                         |                                                       |            |                          |                         |                                                          |            |                          |                       |
| London                                           | 241                                                   | 91.6       | Ref                      | -                       | 243                                                      | 92.7       | Ref                      | -                     |
| North of England                                 | 427                                                   | 91.2       | 0.99 (0.95-1.1)          |                         | 430                                                      | 93.7       | 1.0 (0.97-1.1)           |                       |
| Midlands and East of England                     | 465                                                   | 93.0       | 1.0 (0.97-1.2)           |                         | 465                                                      | 93.9       | 1.0 (0.97-1.1)           |                       |
| South of England                                 | 408                                                   | 89.5       | 0.98 (0.93-1.1)          |                         | 411                                                      | 92.2       | 0.99 (0.95-1.0)          |                       |
| N. Ireland, Scotland, Wales                      | 294                                                   | 92.7       | 1.0 (0.96-1.2)           |                         | 297                                                      | 94.3       | 1.0 (0.97-1.1)           |                       |
| <b>Education</b>                                 |                                                       |            |                          |                         |                                                          |            |                          |                       |
| Degree or above                                  | 584                                                   | 93.1       | Ref                      | -                       | 591                                                      | 94.9       | Ref                      | Ref <sup>e</sup>      |

|                                                 |     |      |                            |                            |     |      |                          |                           |
|-------------------------------------------------|-----|------|----------------------------|----------------------------|-----|------|--------------------------|---------------------------|
| Post-secondary                                  | 332 | 90.2 | 0.97 (0.93-1.1)            |                            | 329 | 90.9 | <b>0.96 (0.92-0.99)*</b> | <b>0.95 (0.92-0.99)*</b>  |
| Secondary or below                              | 863 | 91.3 | 0.98 (0.95-1.1)            |                            | 873 | 93.6 | 0.98 (0.96-1.0)          | 1.0 (0.97-1.0)            |
| <b>Employment status</b>                        |     |      |                            |                            |     |      |                          |                           |
| Working full time                               | 799 | 91.4 | Ref                        | Ref <sup>b</sup>           | 804 | 93.6 | Ref                      | -                         |
| Working part time                               | 255 | 90.4 | 0.99 (0.95-1.0)            | 0.98 (0.93-1.0)            | 263 | 92.9 | 0.99 (0.96-1.0)          |                           |
| Full time student                               | 105 | 93.8 | 1.0 (0.97-1.1)             | 1.0 (0.94-1.1)             | 97  | 89.0 | 0.95 (0.88-1.0)          |                           |
| Retired                                         | 450 | 95.1 | <b>1.1 (1.0-1.2)**</b>     | 1.0 (0.96-1.1)             | 444 | 94.7 | 1.0 (0.98-1.1)           |                           |
| Unemployed or not working                       | 185 | 89.8 | 0.98 (0.93-1.0)            | 1.0 (0.93-1.1)             | 191 | 94.1 | 1.0 (0.96-1.1)           |                           |
| <b>Household income</b>                         |     |      |                            |                            |     |      |                          |                           |
| £50,000 and over                                | 405 | 95.5 | Ref                        | Ref <sup>c</sup>           | 393 | 94.7 | Ref                      | -                         |
| £30,000 to £49,999                              | 417 | 90.7 | <b>0.95 (0.92-0.98)**</b>  | <b>0.95 (0.92-0.98)**</b>  | 424 | 93.6 | 0.99 (0.95-1.2)          |                           |
| £20,000 to £29,999                              | 311 | 92.6 | 0.97 (0.94-1.1)            | 0.96 (0.93-1.0)            | 308 | 91.9 | 0.97 (0.93-1.1)          |                           |
| <£20,000                                        | 363 | 88.3 | <b>0.93 (0.89-0.96)***</b> | <b>0.92 (0.88-0.96)***</b> | 383 | 93.0 | 0.98 (0.95-1.1)          |                           |
| <b>Savings</b>                                  |     |      |                            |                            |     |      |                          |                           |
| £25,000 or more                                 | 329 | 95.6 | Ref                        | Ref <sup>c</sup>           | 318 | 94.1 | Ref                      | Ref <sup>f</sup>          |
| £5,000 to £24,999                               | 319 | 95.2 | 1.0 (0.96-1.1)             | 1.0 (0.97-1.1)             | 317 | 95.8 | 1.0 (0.98-1.1)           | 1.0 (0.98-1.1)            |
| £1,000 to £4,999                                | 274 | 92.3 | 0.96 (0.93-1.1)            | 0.99 (0.95-1.0)            | 272 | 92.8 | 0.98 (0.94-1.1)          | 0.99 (0.96-1.0)           |
| £100 to £999                                    | 217 | 90.0 | <b>0.94 (0.90-0.98)*</b>   | 0.97 (0.92-1.1)            | 221 | 94.8 | 1.0 (0.97-1.1)           | 1.0 (0.96-1.1)            |
| Less than £100                                  | 232 | 84.4 | <b>0.88 (0.83-0.93)***</b> | <b>0.90 (0.85-0.96)**</b>  | 250 | 90.9 | 0.96 (0.92-1.0)          | 0.96 (0.91-1.1)           |
| <b>Housing tenure</b>                           |     |      |                            |                            |     |      |                          |                           |
| Own outright                                    | 576 | 92.1 | Ref                        | Ref <sup>c</sup>           | 575 | 95.0 | Ref                      | Ref <sup>g</sup>          |
| Own with mortgage/shared ownership              | 571 | 89.1 | 0.98 (0.95-1.0)            | 1.0 (0.96-1.1)             | 584 | 95.0 | 1.0 (0.97-1.0)           | 1.0 (0.97-1.1)            |
| Rented from private landlord                    | 277 |      | <b>0.95 (0.91-0.99)*</b>   | 0.97 (0.92-1.0)            | 297 | 94.3 | 0.99 (0.96-1.0)          | 1.0 (0.95-1.1)            |
| Rented from local authority/housing association | 188 | 87.9 |                            |                            | 188 | 90.0 | <b>0.94 (0.90-0.99)*</b> | <b>0.94 (0.89-0.99)**</b> |
| Live with parents, family, or friends           | 197 | 92.9 | <b>0.94 (0.89-0.99)*</b>   | 0.97 (0.91-1.0)            | 178 | 88.1 | <b>0.92 (0.88-0.98)*</b> | 0.95 (0.89-1.0)           |

<sup>a</sup>Excluding those who responded "Don't know"; <sup>b</sup>Mutually adjusted for age, gender, ethnicity, employment status, household income, savings, and housing tenure; <sup>c</sup>Adjusted for age, gender, ethnicity, and employment status; <sup>d</sup>Mutually adjusted for age, gender, ethnicity, marital status, education, savings, and housing tenure; <sup>e</sup>Adjusted for age, gender, ethnicity, marital status, and housing tenure; <sup>f</sup>Adjusted for age, gender, ethnicity, and marital status; <sup>g</sup>Adjusted for age, gender, ethnicity, marital status, and education; \*p<.05, \*\*p<.01, \*\*\*p<.001

1  
2  
3 household incomes of £50,000 and above (88.3% vs. 95.5%; aRR:0.92; 95% CI:0.88,0.96).  
4  
5 Similarly, respondents with less than £100 in savings were less likely to be able to self-isolate  
6  
7 compared with those with savings of £25,000 or more (84.8% vs. 95.6%; aRR:0.90; 95%  
8  
9 CI:0.85,0.96). There was no effect on willingness to self-isolate by household income or  
10  
11 amount of savings (Table 3).  
12

13  
14 Those in accommodation rented from a private landlord, local authority, or housing  
15  
16 association were less likely to report being able to self-isolate, although this association was  
17  
18 no longer significant when other sociodemographic factors were adjusted for. In terms of  
19  
20 willingness to self-isolate, respondents renting accommodation from a local authority or  
21  
22 housing association were less likely to be willing to self-isolate compared with those who  
23  
24 owned their home outright (aRR:0.94; 95% CI:0.89,0.99) (Table 3).  
25

## 26 Discussion

27  
28 This study reports on the perceptions and behaviour of the UK adult population in the two  
29  
30 days following the UK Government's introduction of recommendations on social distancing  
31  
32 on March 16 2020 [6]. We found high levels of self-reported behaviour change. Notably, the  
33  
34 most-adopted measures, washing hands more frequently with soap and water, using hand  
35  
36 sanitiser, and covering nose and mouth when sneezing or coughing, prominently featured in  
37  
38 national public health campaigns from relatively early on in the epidemic [4], and mirrors  
39  
40 results seen in previous pandemics [29]. However, there were marked differences between  
41  
42 the perceived effectiveness and adoption of NPIs. This suggests that lack of knowledge on  
43  
44 what measures are effective against COVID-19 is not a key driver of compliance in the UK  
45  
46 population. In contrast, a similar study conducted in Hong Kong showed comparatively high  
47  
48 perceived effectiveness and adoption of preventive measures [24].  
49

50  
51 Our results highlighted significant differences across demographic and socioeconomic strata  
52  
53 for social distancing behaviour, ability to work from home, and the ability and willingness of  
54  
55 people to self-isolate. There was a strong association between socioeconomic deprivation  
56  
57 and ability to adopt NPIs. Although willingness to self-isolate was high overall, those from  
58  
59 more disadvantaged backgrounds were less likely to be able to work from home or self-  
60  
isolate if needed, suggesting the existence of structural barriers to adopting preventive  
behaviours in these groups. Specifically, our study found that those with less savings were  
the group least likely to adopt NPIs overall. As such, the barriers for this group appear the

1  
2  
3 greatest. This is not surprising, as these individuals are likely to have less cushioning to  
4 withstand financial losses as a result of any NPIs that have a direct or indirect impact on  
5 employment or earnings.  
6  
7

8  
9  
10 The strength of this study is in the representative sample of the UK adult population, the  
11 ability to achieve our sample size quickly, and the timeliness in relation to changing  
12 government recommendations. However, social distancing measures were only brought in  
13 two days before the survey. Therefore, there may have not been enough time for people to  
14 fully implement these measures prior to their participation in the study. But many  
15 employers had already begun allowing staff to work from home in the week prior to the UK  
16 Government's announcement, and ability and willingness to self-isolate do not measure  
17 behaviour change directly but intent. So, we believe our study does indeed measure  
18 attitudes and behaviours based on the most recent advice at the time of the survey. Social  
19 desirability bias is also possible given that participants were asked whether they were  
20 complying with government restrictions. However, this is less of an issue with online surveys  
21 where respondents are assured anonymity and answer questions in the privacy of their own  
22 home without any live human interaction. In addition, our sampling approach is prone to  
23 selection bias, for example by excluding participants without internet access and non-English  
24 speakers, and sampling from a panel of individuals who have specifically opted in to  
25 participate in online research activities. As in almost all population surveys, our study had  
26 unequal participation, with lower response among people from minority ethnic groups and  
27 older age groups. We re-weighted the sample to account for such differential response,  
28 although this may not have overcome unknown participation biases. Furthermore, surveys  
29 collecting self-report data are generally subject to limitations including honesty,  
30 introspective ability, and interpretation of the questions. The survey tool consisted of  
31 predominantly closed-ended questions. Thus, we were unable to explore responses in more  
32 depth.  
33  
34  
35  
36  
37  
38  
39  
40  
41  
42  
43  
44  
45  
46  
47  
48  
49

50 Our findings highlight the stark choices faced by those in lower socioeconomic groups and  
51 suggest that unless the government intervenes to support these individuals, the impact of  
52 this epidemic will likely be felt unequally in our society. Not only this, but if a large  
53 proportion of the population continues to work while unwell, low compliance will render the  
54 various forms of social distancing less effective, as low-income workers are forced to choose  
55 between financial and physical health. Indeed, this behaviour has already been observed in  
56  
57  
58  
59  
60

1  
2  
3 the workplace in previous pandemics: workers without access to paid sick leave were more  
4 likely to work while unwell than those with paid sick leave [30]. A study in China after the  
5 H7N9 epidemic found that only 7% of people reported willingness to self-quarantine [31].  
6  
7 Also, during the Middle East Respiratory Syndrome (MERS) outbreak in South Korea in 2015,  
8  
9 there was heterogeneous uptake of preventive interventions [32].  
10  
11  
12

13 In the absence of a vaccine and treatments over the short-term, high compliance with social  
14 distancing, self-isolation and household quarantine is paramount to reduce transmission and  
15 the impact of COVID-19. NPI compliance, risk perception and behaviour are not consistent  
16 across cultures, social status or time. Indeed, previous studies have shown that perceptions  
17 and behaviours often change over time [29]. Therefore, current modelling projections of the  
18 impact of NPIs on morbidity and mortality are always provisional [7]. Future COVID-19  
19 models should explore the variation captured in this and previous studies to better estimate  
20 the impact of differential uptake of NPIs in the UK and beyond. It is also important to  
21 monitor behaviour throughout the epidemic to know when to implement further public  
22 health messaging, and when further or alternative government actions might be required, to  
23 mitigate falling compliance.  
24  
25  
26  
27  
28  
29  
30  
31  
32

### 33 **Conclusions and policy implications**

34 Our findings highlight that those most economically disadvantaged in society are less able to  
35 comply with certain NPIs, likely in part due to their financial situation. Whilst one approach  
36 may be to better tailor public health messaging to this subpopulation, this must be done  
37 alongside considered fiscal and monetary policy to mitigate the financial costs of following  
38 government public health advice. Therefore, it is imperative that the UK Government, and  
39 governments around the world, quickly develop and implement policies to support the most  
40 vulnerable, in a bid to minimise the long-term social and economic harm caused by COVID-  
41 19. Government policy should recognise the disparity in impact across socioeconomic  
42 groups, particularly across the labour market, and should aim to support workers equitably  
43 across the income spectrum. This would likely help increase compliance across the  
44 population to the levels required to suppress transmission and thereby reduce the strain on  
45 national health services, both in the UK and abroad. Although the UK Government has since  
46 announced a range of measures to support public services, individuals, and businesses, in  
47 part to facilitate compliance with current lockdown measures [33], it is uncertain how long  
48  
49  
50  
51  
52  
53  
54  
55  
56  
57  
58  
59  
60



1  
2  
3 these protections will be in place for and whether they will continue once lockdown  
4 restrictions are lifted.  
5  
6  
7

### 8 **Acknowledgments**

9  
10 The survey was conducted by YouGov on behalf of the Patient Experience Research Centre,  
11 School of Public Health, Imperial College London. Questions were developed by the authors,  
12 and YouGov provided suggestions to improve clarity and understandability.  
13  
14  
15

16 We thank Prof. Kin On Kwok, Ms. Wan In Wei, Prof. Samuel Yeung Shan Wong and the  
17 research team in the Division of Infectious Diseases of JC School of Public Health and Primary  
18 Care, The Chinese University of Hong Kong, Hong Kong Special Administrative Region, China  
19 for permission to use their survey instrument and translating it into English.  
20  
21  
22  
23  
24

### 25 **Contributors**

26 CJA, LB, RR, PP and HW designed the study. CJA, JWE and CV analysed the data and  
27 performed the statistical analyses. CJA, LB, RR, CV and HW drafted the initial manuscript. All  
28 authors reviewed the drafted manuscript for critical content and approved the final version.  
29 The corresponding author attests that all listed authors meet authorship criteria and that no  
30 others meeting the criteria have been omitted. CJA and HW are the guarantors.  
31  
32  
33  
34  
35  
36

### 37 **Declaration of interests**

38 The authors declare that they have no know competing financial interests or personal  
39 relationships that could have appeared to influence the work reported in this paper.  
40  
41  
42  
43

### 44 **Funding**

45 The study was supported by Imperial NIHR Research Capability Funding (Award No. P81291).  
46 Professor Helen Ward is a National Institute for Health Research (NIHR) Senior Investigator  
47 (Award No. P75372). The views expressed in this article are those of the authors and not  
48 necessarily those of the NHS, the NIHR, or the Department of Health.  
49  
50  
51  
52

### 53 **Data sharing**

54 The survey instrument is freely available to download from the School of Public Health,  
55 Imperial College London COVID-19 resources webpage: [https://www.imperial.ac.uk/mrc-  
56 global-infectious-disease-analysis/news--wuhan-coronavirus/covid-19-resources/  
57  
58  
59  
60](https://www.imperial.ac.uk/mrc-global-infectious-disease-analysis/news--wuhan-coronavirus/covid-19-resources/)

The data used for the analyses are available from the corresponding author on request.

## References

1. World\_Health\_Organisation. Rolling updates on coronavirus disease (COVID-19) 2020 [Available from: <https://www.who.int/emergencies/diseases/novel-coronavirus-2019/events-as-they-happen>].
2. ECDC. Coronavirus disease 2019 (COVID-19) pandemic: increased transmission in the EU/EEA and the UK – seventh update Stockholm; 2020 25 March 2020
3. Public\_Health\_England. Weekly Coronavirus Disease 2019 (COVID-19) Surveillance Report: Summary of COVID-19 surveillance systems 2020 [Available from: [https://assets.publishing.service.gov.uk/government/uploads/system/uploads/attachment\\_data/file/888254/COVID19\\_Epidemiological\\_Summary\\_w22\\_Final.pdf](https://assets.publishing.service.gov.uk/government/uploads/system/uploads/attachment_data/file/888254/COVID19_Epidemiological_Summary_w22_Final.pdf)].
4. Russell P. New Coronavirus: UK Public Health Campaign Launched. Medscape. 2020.
5. Department\_of\_Health\_and\_Social\_Care. Coronavirus (COVID-19) action plan 2020 [Available from: <https://www.gov.uk/government/publications/coronavirus-action-plan>].
6. UK\_Government. PM statement on coronavirus: 16 March 2020 2020 [Available from: <https://www.gov.uk/government/speeches/pm-statement-on-coronavirus-16-march-2020>].
7. Ferguson NM, Laydon D, Nedjati-Gilani G, et al. Impact of non-pharmaceutical interventions (NPIs) to reduce COVID19 mortality and healthcare demand. 2020.
8. Cowling BJ, Ng DMW, Ip DKM, et al. Community psychological and behavioral responses through the first wave of the 2009 influenza A(H1N1) pandemic in Hong Kong. *The Journal of Infectious Diseases*. 2010;202(6):867-76.
9. Agüero F, Adell MN, Pérez Giménez A, López Medina MJ, García Continente X. Adoption of preventive measures during and after the 2009 influenza A (H1N1) virus pandemic peak in Spain. *Prev Med*. 2011;53(3):203-6.
10. Rubin GJ, Amlôt R, Page L, Wessely S. Public perceptions, anxiety, and behaviour change in relation to the swine flu outbreak: cross sectional telephone survey. *BMJ*. 2009;339:b2651.
11. Rubin GJ, Potts HW, Michie S. The impact of communications about swine flu (influenza A H1N1v) on public responses to the outbreak: results from 36 national telephone surveys in the UK. *Health technology assessment (Winchester, England)*. 2010;14(34):183-266.

- 1  
2  
3  
4  
5  
6  
7  
8  
9  
10  
11  
12  
13  
14  
15  
16  
17  
18  
19  
20  
21  
22  
23  
24  
25  
26  
27  
28  
29  
30  
31  
32  
33  
34  
35  
36  
37  
38  
39  
40  
41  
42  
43  
44  
45  
46  
47  
48  
49  
50  
51  
52  
53  
54  
55  
56  
57  
58  
59  
60
12. Lau JTF, Griffiths S, Choi KC, Tsui HY. Avoidance behaviors and negative psychological responses in the general population in the initial stage of the H1N1 pandemic in Hong Kong. *BMC Infectious Diseases*. 2010;10(1):139.
  13. Eastwood K, Durrheim D, Francis JL, et al. Knowledge about pandemic influenza and compliance with containment measures among Australians. *Bull World Health Organ*. 2009;87(8):588-94.
  14. Lohiniva AL, Sane J, Sibenberg K, Puumalainen T, Salminen M. Understanding coronavirus disease (COVID-19) risk perceptions among the public to enhance risk communication efforts: a practical approach for outbreaks, Finland, February 2020. *Euro Surveill*. 2020;25(13).(doi):10.2807/1560-7917.ES.2020.25.13.2000317.
  15. Gesser-Edelsburg A, Cohen R, Hijazi R, Abed Elhadi Shahbari N. Analysis of Public Perception of the Israeli Government's Early Emergency Instructions Regarding COVID-19: Online Survey Study. *J Med Internet Res*. 2020;22(5):e19370. doi: 10.2196/.
  16. Olapegba PO, Ayandele O. Survey data of COVID-19-related Knowledge, Risk Perceptions and Precautionary Behavior among Nigerians. *Data Brief*. 2020;8(105685):105685.
  17. Motta Zanin G, Gentile E, Parisi A, Spasiano D. A Preliminary Evaluation of the Public Risk Perception Related to the COVID-19 Health Emergency in Italy. *Int J Environ Res Public Health*. 2020;17(9).(pii):ijerph17093024. doi: 10.3390/ijerph.
  18. Kin On K, Kin Kit L, Henry Ho Hin C, et al. Community Responses during Early Phase of COVID-19 Epidemic, Hong Kong. *Emerging Infectious Disease journal*. 2020;26(7).
  19. McFadden SM, Malik AA, Aguolu OG, Willebrand KS, Omer SB. Perceptions of the adult US population regarding the novel coronavirus outbreak. *PLoS One*. 2020;15(4):e0231808. doi: 10.1371/journal.pone.. eCollection 2020.
  20. Husnayain A, Shim E, Fuad A, Su EC-Y. Understanding the Community Risk Perceptions of the COVID-19 Outbreak in South Korea: Infodemiology Study. *J Med Internet Res*. 2020;22(9):e19788.
  21. Atchison CJ, Bowman L, Eaton JW, et al. Report 10: Public Response to UK Government Recommendations on COVID-19: Population Survey, 17-18 March 2020 2020.
  22. YouGov. ESOMAR28: 28 questions to help online research buyers 14 March 2020. Available from: [http://doc.ukdataservice.ac.uk/doc/7647/mrdoc/pdf/7647\\_methodology\\_esomar\\_28.pdf](http://doc.ukdataservice.ac.uk/doc/7647/mrdoc/pdf/7647_methodology_esomar_28.pdf).
  23. Office\_for\_National\_Statistics. UK 2011 census data [Available from: <https://www.ons.gov.uk/census/2011census>].

- 1  
2  
3 24. Kwok KO, Li KK, Chan HHH, et al. Community responses during the early phase of the  
4 COVID-19 epidemic in Hong Kong: risk perception, information exposure and preventive  
5 measures. medRxiv. 2020.  
6  
7  
8 25. Fenton K, Pawson E, de Souza-Thomas L. Beyond the Data: Understanding the  
9 Impact of COVID-19 on BAME Communities. PHE. Online report. 2020 [Available from:  
10 [https://assets.publishing.service.gov.uk/government/uploads/system/uploads/attachment](https://assets.publishing.service.gov.uk/government/uploads/system/uploads/attachment_data/file/892376/COVID_stakeholder_engagement_synthesis_beyond_the_data.pdf)  
11 [data/file/892376/COVID\\_stakeholder\\_engagement\\_synthesis\\_beyond\\_the\\_data.pdf](https://assets.publishing.service.gov.uk/government/uploads/system/uploads/attachment_data/file/892376/COVID_stakeholder_engagement_synthesis_beyond_the_data.pdf).  
12  
13  
14 26. Ranganathan P, Pramesh CS, Aggarwal R. Common pitfalls in statistical analysis:  
15 Logistic regression. *Perspect Clin Res*. 2017;8(3):148-51.  
16  
17 27. Rothman KJ. No adjustments are needed for multiple comparisons. *Epidemiology*  
18 (Cambridge, Mass). 1990;1(1):43-6.  
19  
20 28. Feise RJ. Do multiple outcome measures require p-value adjustment? *BMC Medical*  
21 *Research Methodology*. 2002;2(1):8.  
22  
23 29. Bults M, Beaujean DJ, Richardus JH, Voeten HA. Perceptions and behavioral  
24 responses of the general public during the 2009 influenza A (H1N1) pandemic: a systematic  
25 review. *Disaster Med Public Health Prep*. 2015;9(2):207-19. doi: 10.1017/dmp.2014.160.  
26  
27 30. Ahmed F, Zviedrite N, Uzicanin A. Effectiveness of workplace social distancing  
28 measures in reducing influenza transmission: a systematic review. *BMC Public Health*.  
29 2018;18(1):518. doi: 10.1186/s12889-018-5446-1.  
30  
31 31. Goodwin R, Sun S. Public perceptions and reactions to H7N9 in Mainland China. *J*  
32 *Infect*. 2013;67(5):458-62. doi: 10.1016/j.jinf.2013.06.014. Epub Jul 5.  
33  
34 32. Jang WM, Cho S, Jang DH, et al. Preventive Behavioral Responses to the 2015 Middle  
35 East Respiratory Syndrome Coronavirus Outbreak in Korea. *Int J Environ Res Public Health*.  
36 2019;16(12).(pii):ijerph16122161. doi: 10.3390/ijerph.  
37  
38 33. UK\_Government. Support for those affected by Covid-19 2020 [Available from:  
39 <https://www.gov.uk/government/publications/support-for-those-affected-by-covid-19>.  
40  
41  
42  
43  
44  
45  
46  
47  
48  
49  
50  
51  
52  
53  
54  
55  
56  
57  
58  
59  
60

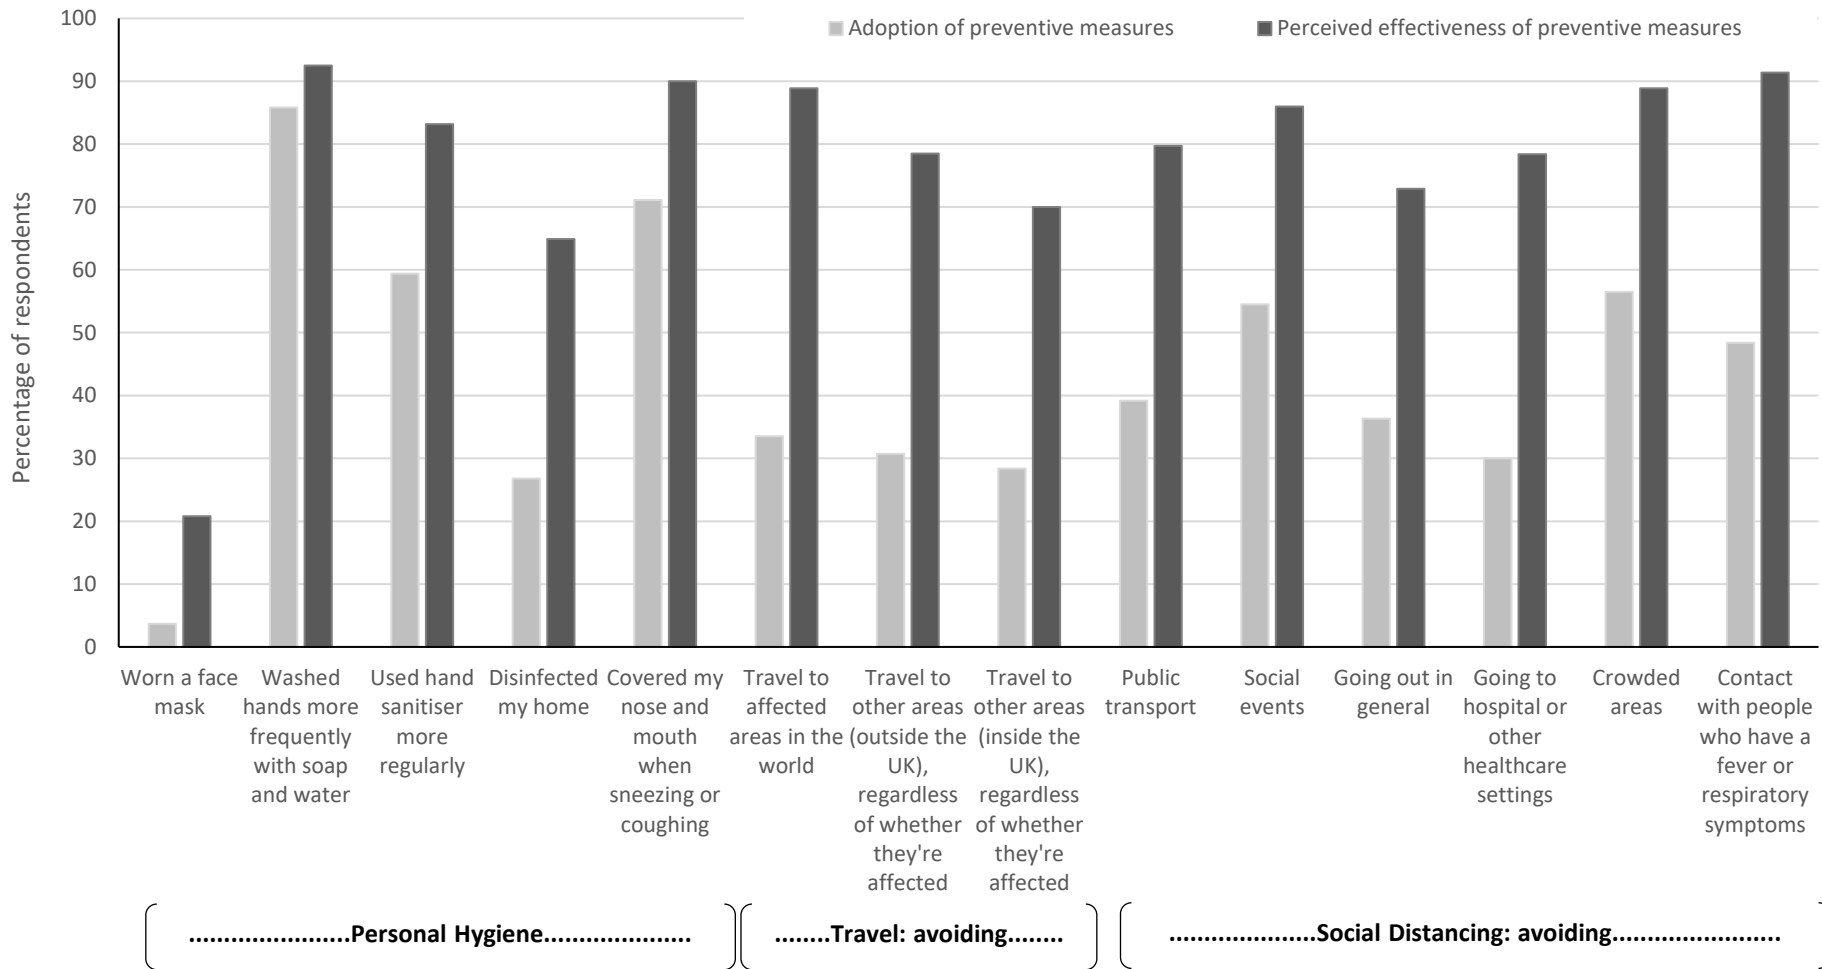

## Sample – Weighting Strategy

The weighting approach used rim weighting to adjust to population estimates of: age by sex; UK geographical region counts; ethnic group.

The age by sex and region counts were extracted from the ONS mid-year population estimates (1), and the ethnic group counts from the Labour Force Survey (Annual Population Survey) (2). To allow for the different sources of population estimates, the rim weighting was carried out on the proportions rather than population totals.

Age was grouped into seven categories: 18 to 24; 25 to 34; 35 to 44; 45 to 54; 55 to 64; 65 to 74; 75 or older. So the age and sex groups had 14 categories.

The reported ethnicity was grouped into nine categories: white; mixed / multiple ethnic groups; Indian; Pakistani; Bangladeshi; Chinese; any other Asian background; black African / Caribbean / other; and any other ethnic group or missing.

The rim weighting was carried out in two stages. At the first stage, the sample was weighted to region counts and age by sex groups only. This put the sample back into the correct proportion for UK geographical regions which corrects for the differential non-response. In the same stage, the age and sex groups were also adjusted to make sure that the final weighted profile was as close to the population as possible.

The second stage of rim weighting adjusted to all four measures, using the first stage weights as the starting weights. The adjustment factor between the first and second stage weights were trimmed at the 1<sup>st</sup> and 99<sup>th</sup> percentiles to dampen the extreme weights which improves efficiency. The final weights were calculated as the first stage weights multiplied by the trimmed adjustment factor for the second stage.

## Sample profile

|                             | Population of United Kingdom Profile | COMPLETED SURVEY - UNWEIGHTED (%) | COMPLETED SURVEY - WEIGHTED (%) |
|-----------------------------|--------------------------------------|-----------------------------------|---------------------------------|
| <b>GENDER</b>               |                                      |                                   |                                 |
| Male                        | 48.9%                                | 47.4%                             | 48.6%                           |
| Female                      | 51.1%                                | 52.6%                             | 51.4%                           |
|                             |                                      |                                   |                                 |
| <b>AGE</b>                  |                                      |                                   |                                 |
| 18 to 24                    | 10.9%                                | 10.3%                             | 11.1%                           |
| 25 to 34                    | 17.3%                                | 14.0%                             | 14.4%                           |
| 35 to 44                    | 16.1%                                | 18.8%                             | 19.3%                           |
| 45 to 54                    | 17.5%                                | 16.8%                             | 17.5%                           |
| 55 to 64                    | 15.0%                                | 13.7%                             | 14.6%                           |
| 65 to 74                    | 12.6%                                | 20.5%                             | 17.9%                           |
| 75+                         | 10.5%                                | 6.0%                              | 5.2%                            |
|                             |                                      |                                   |                                 |
| <b>REGION</b>               |                                      |                                   |                                 |
| North East                  | 4.0%                                 | 4.7%                              | 4.4%                            |
| North West                  | 11.0%                                | 11.7%                             | 10.9%                           |
| Yorkshire & Humber          | 8.2%                                 | 8.4%                              | 8.0%                            |
| East Midlands               | 7.2%                                 | 7.5%                              | 7.7%                            |
| West Midlands               | 8.9%                                 | 8.3%                              | 8.4%                            |
| East of England             | 9.3%                                 | 9.4%                              | 9.1%                            |
| London                      | 13.4%                                | 11.3%                             | 13.1%                           |
| South East                  | 13.7%                                | 13.1                              | 13.0%                           |
| South West                  | 8.4%                                 | 9.9%                              | 9.6%                            |
| N. Ireland, Scotland, Wales | 15.7%                                | 15.7%                             | 15.9%                           |

|                                       |       |       |       |
|---------------------------------------|-------|-------|-------|
|                                       |       |       |       |
| <b>ETHNICITY</b>                      |       |       |       |
| White                                 | 86.3% | 94.2% | 93.9% |
| Mixed/Multiple ethnic groups          | 1.1%  | 1.6%  | 1.7%  |
| Indian                                | 2.9%  | 1.0%  | 1.1%  |
| Pakistani                             | 1.9%  | 0.52% | 0.54% |
| Bangladeshi                           | 0.8%  | 0.14% | 0.15% |
| Chinese                               | 0.5%  | 0.43% | 0.46% |
| Any other Asian background            | 1.2%  | 0.14% | 0.16% |
| Black/African/Caribbean/Black British | 3.3%  | 0.95% | 1.0%  |
| Other ethnic group / DK               | 1.9%  | 1.0%  | 1.0%  |

**REFERENCES**

- Office for National Statistics. Population estimates for the UK, England and Wales, Scotland and Northern Ireland: mid-2019 2020 [Available from: [www.ons.gov.uk/releases/populationestimatesfortheukenglandandwalescotlandandnorthernirelandmid2019](http://www.ons.gov.uk/releases/populationestimatesfortheukenglandandwalescotlandandnorthernirelandmid2019)].
- Office for National Statistics. Annual Population Survey/Labour Force Survey 2020 [Available from: <https://www.nomisweb.co.uk/sources/aps>].



STROBE Statement—Checklist of items that should be included in reports of *cross-sectional studies*

|                              | Item No | Recommendation                                                                                                                                                                                                                                                                                                                                                                                                   |
|------------------------------|---------|------------------------------------------------------------------------------------------------------------------------------------------------------------------------------------------------------------------------------------------------------------------------------------------------------------------------------------------------------------------------------------------------------------------|
| <b>Title and abstract</b>    | 1       | (a) Indicate the study's design with a commonly used term in the title or the abstract<br><b>PAGE 1 and 2</b><br>(b) Provide in the abstract an informative and balanced summary of what was done and what was found <b>PAGE 2</b>                                                                                                                                                                               |
| <b>Introduction</b>          |         |                                                                                                                                                                                                                                                                                                                                                                                                                  |
| Background/rationale         | 2       | Explain the scientific background and rationale for the investigation being reported<br><b>PAGE 4</b>                                                                                                                                                                                                                                                                                                            |
| Objectives                   | 3       | State specific objectives, including any prespecified hypotheses <b>PAGE 4</b>                                                                                                                                                                                                                                                                                                                                   |
| <b>Methods</b>               |         |                                                                                                                                                                                                                                                                                                                                                                                                                  |
| Study design                 | 4       | Present key elements of study design early in the paper <b>PAGE 5-6</b>                                                                                                                                                                                                                                                                                                                                          |
| Setting                      | 5       | Describe the setting, locations, and relevant dates, including periods of recruitment, exposure, follow-up, and data collection <b>PAGE 5-6</b>                                                                                                                                                                                                                                                                  |
| Participants                 | 6       | (a) Give the eligibility criteria, and the sources and methods of selection of participants <b>PAGE 5-6</b>                                                                                                                                                                                                                                                                                                      |
| Variables                    | 7       | Clearly define all outcomes, exposures, predictors, potential confounders, and effect modifiers. Give diagnostic criteria, if applicable <b>PAGE 5-7</b>                                                                                                                                                                                                                                                         |
| Data sources/<br>measurement | 8*      | For each variable of interest, give sources of data and details of methods of assessment (measurement). Describe comparability of assessment methods if there is more than one group <b>PAGE 5-6</b>                                                                                                                                                                                                             |
| Bias                         | 9       | Describe any efforts to address potential sources of bias <b>PAGE 5 and 7</b>                                                                                                                                                                                                                                                                                                                                    |
| Study size                   | 10      | Explain how the study size was arrived at <b>PAGE 5</b>                                                                                                                                                                                                                                                                                                                                                          |
| Quantitative variables       | 11      | Explain how quantitative variables were handled in the analyses. If applicable, describe which groupings were chosen and why <b>PAGE 7</b>                                                                                                                                                                                                                                                                       |
| Statistical methods          | 12      | (a) Describe all statistical methods, including those used to control for confounding<br><b>PAGE 7</b><br>(b) Describe any methods used to examine subgroups and interactions <b>PAGE 7</b><br>(c) Explain how missing data were addressed <b>N/A</b><br>(d) If applicable, describe analytical methods taking account of sampling strategy<br><b>PAGE 7</b><br>(e) Describe any sensitivity analyses <b>N/A</b> |
| <b>Results</b>               |         |                                                                                                                                                                                                                                                                                                                                                                                                                  |
| Participants                 | 13*     | (a) Report numbers of individuals at each stage of study—eg numbers potentially eligible, examined for eligibility, confirmed eligible, included in the study, completing follow-up, and analysed <b>PAGE 8</b><br>(b) Give reasons for non-participation at each stage <b>N/A</b><br>(c) Consider use of a flow diagram <b>N/A</b>                                                                              |
| Descriptive data             | 14*     | (a) Give characteristics of study participants (eg demographic, clinical, social) and information on exposures and potential confounders <b>PAGE 8-15</b><br>(b) Indicate number of participants with missing data for each variable of interest<br><b>Tables 1-3</b>                                                                                                                                            |
| Outcome data                 | 15*     | Report numbers of outcome events or summary measures <b>PAGE 8-15</b>                                                                                                                                                                                                                                                                                                                                            |
| Main results                 | 16      | (a) Give unadjusted estimates and, if applicable, confounder-adjusted estimates and their precision (eg, 95% confidence interval). Make clear which confounders were adjusted for and why they were included <b>PAGE 11-15; Tables 2-3</b>                                                                                                                                                                       |

(b) Report category boundaries when continuous variables were categorized **PAGE 8-15; Tables 1-3**

(c) If relevant, consider translating estimates of relative risk into absolute risk for a meaningful time period **N/A**

|                          |    |                                                                                                                                                                                              |
|--------------------------|----|----------------------------------------------------------------------------------------------------------------------------------------------------------------------------------------------|
| Other analyses           | 17 | Report other analyses done—eg analyses of subgroups and interactions, and sensitivity analyses <b>PAGE 10-15; Tables 2-3</b>                                                                 |
| <b>Discussion</b>        |    |                                                                                                                                                                                              |
| Key results              | 18 | Summarise key results with reference to study objectives <b>PAGE 16</b>                                                                                                                      |
| Limitations              | 19 | Discuss limitations of the study, taking into account sources of potential bias or imprecision. Discuss both direction and magnitude of any potential bias <b>PAGE 17</b>                    |
| Interpretation           | 20 | Give a cautious overall interpretation of results considering objectives, limitations, multiplicity of analyses, results from similar studies, and other relevant evidence <b>PAGE 16-18</b> |
| Generalisability         | 21 | Discuss the generalisability (external validity) of the study results <b>PAGE 17-18</b>                                                                                                      |
| <b>Other information</b> |    |                                                                                                                                                                                              |
| Funding                  | 22 | Give the source of funding and the role of the funders for the present study and, if applicable, for the original study on which the present article is based <b>PAGE 19</b>                 |

\*Give information separately for exposed and unexposed groups.

**Note:** An Explanation and Elaboration article discusses each checklist item and gives methodological background and published examples of transparent reporting. The STROBE checklist is best used in conjunction with this article (freely available on the Web sites of PLoS Medicine at <http://www.plosmedicine.org/>, Annals of Internal Medicine at <http://www.annals.org/>, and Epidemiology at <http://www.epidem.com/>). Information on the STROBE Initiative is available at [www.strobe-statement.org](http://www.strobe-statement.org).
