# Supplementary material for: Early perceptions and behavioural responses during the COVID-19 pandemic: a cross-sectional survey of UK adults
Source: PubMed Central journal article supplement — BMJ Open. 2021 Jan 4;11(1):e043577. doi: 10.1136/bmjopen-2020-043577 (PMC7783373; doi:10.1136/bmjopen-2020-043577), 2021-01-04
Supplement: bmjopen-2020-043577supp001.pdf [file bmjopen-2020-043577supp001.pdf]

## Sample – Weighting Strategy

The weighting approach used rim weighting to adjust to population estimates of: age by sex; UK geographical region counts; ethnic group.

The age by sex and region counts were extracted from the ONS mid-year population estimates (1), and the ethnic group counts from the Labour Force Survey (Annual Population Survey) (2). To allow for the different sources of population estimates, the rim weighting was carried out on the proportions rather than population totals.

Age was grouped into seven categories: 18 to 24; 25 to 34; 35 to 44; 45 to 54; 55 to 64; 65 to 74; 75 or older. So the age and sex groups had 14 categories.

The reported ethnicity was grouped into nine categories: white; mixed / multiple ethnic groups; Indian; Pakistani; Bangladeshi; Chinese; any other Asian background; black African / Caribbean / other; and any other ethnic group or missing.

The rim weighting was carried out in two stages. At the first stage, the sample was weighted to region counts and age by sex groups only. This put the sample back into the correct proportion for UK geographical regions which corrects for the differential non-response. In the same stage, the age and sex groups were also adjusted to make sure that the final weighted profile was as close to the population as possible.

The second stage of rim weighting adjusted to all four measures, using the first stage weights as the starting weights. The adjustment factor between the first and second stage weights were trimmed at the 1<sup>st</sup> and 99<sup>th</sup> percentiles to dampen the extreme weights which improves efficiency. The final weights were calculated as the first stage weights multiplied by the trimmed adjustment factor for the second stage.

## Sample profile

|                             | Population of United Kingdom Profile | COMPLETED SURVEY - UNWEIGHTED (%) | COMPLETED SURVEY - WEIGHTED (%) |
|-----------------------------|--------------------------------------|-----------------------------------|---------------------------------|
| <b>GENDER</b>               |                                      |                                   |                                 |
| Male                        | 48.9%                                | 47.4%                             | 48.6%                           |
| Female                      | 51.1%                                | 52.6%                             | 51.4%                           |
|                             |                                      |                                   |                                 |
| <b>AGE</b>                  |                                      |                                   |                                 |
| 18 to 24                    | 10.9%                                | 10.3%                             | 11.1%                           |
| 25 to 34                    | 17.3%                                | 14.0%                             | 14.4%                           |
| 35 to 44                    | 16.1%                                | 18.8%                             | 19.3%                           |
| 45 to 54                    | 17.5%                                | 16.8%                             | 17.5%                           |
| 55 to 64                    | 15.0%                                | 13.7%                             | 14.6%                           |
| 65 to 74                    | 12.6%                                | 20.5%                             | 17.9%                           |
| 75+                         | 10.5%                                | 6.0%                              | 5.2%                            |
|                             |                                      |                                   |                                 |
| <b>REGION</b>               |                                      |                                   |                                 |
| North East                  | 4.0%                                 | 4.7%                              | 4.4%                            |
| North West                  | 11.0%                                | 11.7%                             | 10.9%                           |
| Yorkshire & Humber          | 8.2%                                 | 8.4%                              | 8.0%                            |
| East Midlands               | 7.2%                                 | 7.5%                              | 7.7%                            |
| West Midlands               | 8.9%                                 | 8.3%                              | 8.4%                            |
| East of England             | 9.3%                                 | 9.4%                              | 9.1%                            |
| London                      | 13.4%                                | 11.3%                             | 13.1%                           |
| South East                  | 13.7%                                | 13.1                              | 13.0%                           |
| South West                  | 8.4%                                 | 9.9%                              | 9.6%                            |
| N. Ireland, Scotland, Wales | 15.7%                                | 15.7%                             | 15.9%                           |

|                                       |       |       |       |
|---------------------------------------|-------|-------|-------|
|                                       |       |       |       |
| <b>ETHNICITY</b>                      |       |       |       |
| White                                 | 86.3% | 94.2% | 93.9% |
| Mixed/Multiple ethnic groups          | 1.1%  | 1.6%  | 1.7%  |
| Indian                                | 2.9%  | 1.0%  | 1.1%  |
| Pakistani                             | 1.9%  | 0.52% | 0.54% |
| Bangladeshi                           | 0.8%  | 0.14% | 0.15% |
| Chinese                               | 0.5%  | 0.43% | 0.46% |
| Any other Asian background            | 1.2%  | 0.14% | 0.16% |
| Black/African/Caribbean/Black British | 3.3%  | 0.95% | 1.0%  |
| Other ethnic group / DK               | 1.9%  | 1.0%  | 1.0%  |

## REFERENCES

1. Office for National Statistics. Population estimates for the UK, England and Wales, Scotland and Northern Ireland: mid-2019 2020 [Available from: [www.ons.gov.uk/releases/populationestimatesfortheukenglandandwalesscotlandandnorthernirelandmid2019](http://www.ons.gov.uk/releases/populationestimatesfortheukenglandandwalesscotlandandnorthernirelandmid2019)].
2. Office for National Statistics. Annual Population Survey/Labour Force Survey 2020 [Available from: <https://www.nomisweb.co.uk/sources/aps>].
